# Supplementary material for: Physiological, transcriptomic, and metabolomic analyses reveal zinc oxide nanoparticles modulate plant growth in tomato
Source: Royal Society of Chemistry journal article supplement (doi:10.1039/d0en00723d), 2020-01-01
Supplement: d0en00723d2.xlsx [file d0en00723d2.xlsx]

## Sheet: NP_leaf
Table S2. Differentially expressed genes in the leaves and roots of tomato seedlings.
Gene ID	log2 (NP_leaf/control_leaf)	Q value (control_leaf-vs-NP_leaf)	Kegg Orthology	GO	Nr
Solyc12g035225.1	9.08165	2.14689e-52	K21437//ankyrin repeat domain-containing protein 13;K10398//kinesin family member 11;K11866//STAM-binding protein [EC:3.4.19.12]+ko04144//Endocytosis;K04733//interleukin-1 receptor-associated kinase 4 [EC:2.7.11.1];K20799//BRISC complex subunit Abro1		XP_010314161.1|1.1e-188|PREDICTED: zinc finger BED domain-containing protein RICESLEEPER 1-like isoform X1 [Solanum lycopersicum]
Solyc03g005530.1	7.92819	2.63024e-27	K08176//MFS transporter, PHS family, inorganic phosphate transporter	GO:0051179//localization;GO:0006817//phosphate ion transport;GO:0006811//ion transport;GO:0051234//establishment of localization;GO:0006820//anion transport;GO:0006810//transport;GO:0015698//inorganic anion transport;GO:0016021//integral component of membrane;GO:0031224//intrinsic component of membrane;GO:0016020//membrane;GO:0044425//membrane part;GO:0022804//active transmembrane transporter act…	AIU41747.1|4.3e-285|phosphorus transporter PT2 [Lycium barbarum]
Solyc12g035223.1	7.55113	5.66063e-22
Solyc08g079970.1	7.24371	2.22171e-18	K15333//tRNA guanosine-2'-O-methyltransferase [EC:2.1.1.34];K12619//5'-3' exoribonuclease 2 [EC:3.1.13.-]+ko03018//RNA degradation+ko03008//Ribosome biogenesis in eukaryotes	GO:0004252//serine-type endopeptidase activity;GO:0140096//catalytic activity, acting on a protein;GO:0016787//hydrolase activity;GO:0070011//peptidase activity, acting on L-amino acid peptides;GO:0004175//endopeptidase activity;GO:0008236//serine-type peptidase activity;GO:0017171//serine hydrolase activity;GO:0003824//catalytic activity;GO:0008233//peptidase activity;	XP_019070630.1|0.0e+00|PREDICTED: subtilisin-like protease SBT1.7 [Solanum lycopersicum]
Solyc01g073810.2	7.2118	4.82913e-18	K17609//nucleoredoxin [EC:1.8.1.8]	GO:0043169//cation binding;GO:0043167//ion binding;GO:0046872//metal ion binding;GO:0005488//binding;	XP_019068254.1|3.0e-154|PREDICTED: uncharacterized protein LOC101249296 [Solanum lycopersicum]
Solyc10g076220.2	7.05903	2.69208e-46	K00430//peroxidase [EC:1.11.1.7]+ko01100//Metabolic pathways+ko01110//Biosynthesis of secondary metabolites+ko00940//Phenylpropanoid biosynthesis		OVA03712.1|1.6e-250|Plant peroxidase [Macleaya cordata]
Solyc03g119950.1	6.86406	1.01206e-14	K22733//magnesium transporter	GO:0016070//RNA metabolic process;GO:0006996//organelle organization;GO:0009987//cellular process;GO:0006139//nucleobase-containing compound metabolic process;GO:0008152//metabolic process;GO:0009314//response to radiation;GO:0043412//macromolecule modification;GO:1901360//organic cyclic compound metabolic process;GO:0044260//cellular macromolecule metabolic process;GO:0043170//macromolecule meta…	XP_004235725.1|0.0e+00|PREDICTED: pentatricopeptide repeat-containing protein At1g15510, chloroplastic [Solanum lycopersicum]
Solyc11g028175.1	6.80246	3.39155e-14	K19984//exocyst complex component 5;K21437//ankyrin repeat domain-containing protein 13;K10398//kinesin family member 11;K04733//interleukin-1 receptor-associated kinase 4 [EC:2.7.11.1];K11866//STAM-binding protein [EC:3.4.19.12]+ko04144//Endocytosis	GO:0046983//protein dimerization activity;GO:1901363//heterocyclic compound binding;GO:0003677//DNA binding;GO:0097159//organic cyclic compound binding;GO:0005515//protein binding;GO:0003676//nucleic acid binding;GO:0005488//binding;	XP_009767846.1|4.2e-174|PREDICTED: zinc finger BED domain-containing protein RICESLEEPER 1-like [Nicotiana sylvestris]
Solyc04g049445.1	6.67666	3.49581e-13			XP_015161087.1|3.9e-31|PREDICTED: uncharacterized protein LOC107057701 [Solanum tuberosum]
Solyc00g247300.3	6.47329	1.06678e-11	K20562//biphenyl-4-hydroxylase	GO:0016021//integral component of membrane;GO:0016020//membrane;GO:0031224//intrinsic component of membrane;GO:0044425//membrane part;GO:0003824//catalytic activity;GO:0046872//metal ion binding;GO:0048037//cofactor binding;GO:0097159//organic cyclic compound binding;GO:0046914//transition metal ion binding;GO:0046906//tetrapyrrole binding;GO:0005488//binding;GO:1901363//heterocyclic compound bin…	XP_004253509.1|1.9e-286|PREDICTED: cytochrome P450 CYP736A12-like [Solanum lycopersicum]
Solyc12g010233.1	6.47021	2.51211e-25	K19984//exocyst complex component 5;K10398//kinesin family member 11;K21437//ankyrin repeat domain-containing protein 13;K04733//interleukin-1 receptor-associated kinase 4 [EC:2.7.11.1];K03283//heat shock 70kDa protein 1/2/6/8+ko03040//Spliceosome+ko04144//Endocytosis+ko04141//Protein processing in endoplasmic reticulum		XP_015081314.1|2.8e-109|PREDICTED: zinc finger BED domain-containing protein RICESLEEPER 2-like [Solanum pennellii]
Solyc03g031590.3	6.1697	8.77332e-10		GO:0009987//cellular process;GO:0050801//ion homeostasis;GO:0065007//biological regulation;GO:0019725//cellular homeostasis;GO:0055082//cellular chemical homeostasis;GO:0042592//homeostatic process;GO:0065008//regulation of biological quality;GO:0048878//chemical homeostasis;GO:0006873//cellular ion homeostasis;GO:0016021//integral component of membrane;GO:0044425//membrane part;GO:0005623//cell;…	XP_004234470.1|7.6e-216|PREDICTED: S-type anion channel SLAH1-like [Solanum lycopersicum]
Solyc08g079930.2	6.14059	2.28978e-51	K15333//tRNA guanosine-2'-O-methyltransferase [EC:2.1.1.34];K12619//5'-3' exoribonuclease 2 [EC:3.1.13.-]+ko03018//RNA degradation+ko03008//Ribosome biogenesis in eukaryotes;K13199//plasminogen activator inhibitor 1 RNA-binding protein;K13124//mitogen-activated protein kinase organizer 1;K14568//rRNA small subunit pseudouridine methyltransferase Nep1 [EC:2.1.1.260]+ko03008//Ribosome biogenesis in…	GO:0003824//catalytic activity;GO:0004175//endopeptidase activity;GO:0008233//peptidase activity;GO:0070011//peptidase activity, acting on L-amino acid peptides;GO:0140096//catalytic activity, acting on a protein;GO:0004252//serine-type endopeptidase activity;GO:0008236//serine-type peptidase activity;GO:0017171//serine hydrolase activity;GO:0016787//hydrolase activity;	XP_019070611.1|0.0e+00|PREDICTED: subtilisin-like protease SBT1.7 [Solanum lycopersicum]
Solyc12g040580.1	6.01221	6.42904e-09	K00033//6-phosphogluconate dehydrogenase [EC:1.1.1.44 1.1.1.343]+ko00030//Pentose phosphate pathway+ko01100//Metabolic pathways+ko01110//Biosynthesis of secondary metabolites+ko01200//Carbon metabolism+ko00480//Glutathione metabolism	GO:0043436//oxoacid metabolic process;GO:0019682//glyceraldehyde-3-phosphate metabolic process;GO:0051186//cofactor metabolic process;GO:0051156//glucose 6-phosphate metabolic process;GO:1901564//organonitrogen compound metabolic process;GO:0019752//carboxylic acid metabolic process;GO:0019520//aldonic acid metabolic process;GO:0046496//nicotinamide nucleotide metabolic process;GO:0006098//pentos…	XP_004237068.1|2.3e-60|PREDICTED: 6-phosphogluconate dehydrogenase, decarboxylating 3-like [Solanum lycopersicum]
Solyc07g009020.2	6.0035	1.48497e-16		GO:0006952//defense response;GO:0050896//response to stimulus;GO:0006950//response to stress;	XP_015170881.1|2.9e-52|PREDICTED: defensin D1-like [Solanum tuberosum]
Solyc07g052530.3	5.84064	4.60286e-08	K00430//peroxidase [EC:1.11.1.7]+ko01100//Metabolic pathways+ko01110//Biosynthesis of secondary metabolites+ko00940//Phenylpropanoid biosynthesis	GO:0071669//plant-type cell wall organization or biogenesis;GO:0042743//hydrogen peroxide metabolic process;GO:0044248//cellular catabolic process;GO:0042737//drug catabolic process;GO:0050896//response to stimulus;GO:0016043//cellular component organization;GO:0006979//response to oxidative stress;GO:0042744//hydrogen peroxide catabolic process;GO:0051187//cofactor catabolic process;GO:0008152//…	XP_004243459.1|1.1e-185|PREDICTED: peroxidase 3-like [Solanum lycopersicum]
Solyc01g015250.1	5.82867	5.25314e-08
Solyc01g106610.2	5.75467	3.88527e-14	K13449//pathogenesis-related protein 1+ko04016//MAPK signaling pathway - plant+ko04626//Plant-pathogen interaction+ko04075//Plant hormone signal transduction	GO:0005576//extracellular region;	NP_001234128.2|3.5e-104|pathogenesis-related protein 1A1 precursor [Solanum lycopersicum]
Solyc01g104740.3	5.74705	1.24185e-07	K03627//putative transcription factor	GO:0003677//DNA binding;GO:0043565//sequence-specific DNA binding;GO:0003676//nucleic acid binding;GO:0097159//organic cyclic compound binding;GO:1901363//heterocyclic compound binding;GO:0005488//binding;	NP_001234468.2|1.3e-74|ethylene-responsive transcriptional coactivator [Solanum lycopersicum]
Solyc02g069200.3	5.71541	8.68172e-14	K14709//solute carrier family 39 (zinc transporter), member 1/2/3	GO:0072511//divalent inorganic cation transport;GO:0098655//cation transmembrane transport;GO:0098660//inorganic ion transmembrane transport;GO:0006812//cation transport;GO:0051234//establishment of localization;GO:0051179//localization;GO:0006811//ion transport;GO:0071577//zinc ion transmembrane transport;GO:0055085//transmembrane transport;GO:0006810//transport;GO:0006829//zinc ion transport;GO…	NP_001234248.1|1.6e-194|iron-regulated transporter 1 precursor [Solanum lycopersicum]
Solyc07g008980.3	5.70968	1.64087e-51		GO:0006950//response to stress;GO:0050896//response to stimulus;GO:0006952//defense response;	XP_019256581.1|9.4e-33|PREDICTED: defensin-like protein 19 [Nicotiana attenuata]
Solyc03g113570.1	5.62222	4.2899e-07		GO:0005576//extracellular region;GO:0044464//cell part;GO:0030312//external encapsulating structure;GO:0005623//cell;GO:0071944//cell periphery;GO:0005618//cell wall;GO:0046872//metal ion binding;GO:0005488//binding;GO:0046914//transition metal ion binding;GO:0043169//cation binding;GO:0045735//nutrient reservoir activity;GO:0043167//ion binding;GO:0030145//manganese ion binding;	XP_004236166.1|2.8e-121|PREDICTED: germin-like protein subfamily T member 2 [Solanum lycopersicum]
Solyc07g008130.3	5.60828	1.39143e-24	K03006//DNA-directed RNA polymerase II subunit RPB1 [EC:2.7.7.6]+ko03020//RNA polymerase;K04733//interleukin-1 receptor-associated kinase 4 [EC:2.7.11.1]	GO:0016021//integral component of membrane;GO:0044425//membrane part;GO:0016020//membrane;GO:0031224//intrinsic component of membrane;GO:0003824//catalytic activity;GO:0016491//oxidoreductase activity;GO:0009055//electron transfer activity;	XP_015081721.1|2.6e-97|PREDICTED: umecyanin-like [Solanum pennellii]
Solyc07g009230.3	5.54236	3.19653e-113		GO:0006950//response to stress;GO:0006952//defense response;GO:0050896//response to stimulus;	XP_009598086.1|2.2e-32|PREDICTED: defensin Lc-def-like [Nicotiana tomentosiformis]
Solyc07g009435.1	5.53649	2.00152e-23			XP_004242862.1|1.3e-59|PREDICTED: uncharacterized protein LOC101247440 [Solanum lycopersicum]
Solyc12g055700.2	5.46713	1.76512e-06			XP_004252626.1|6.2e-54|PREDICTED: uncharacterized protein LOC101252260 [Solanum lycopersicum]
Solyc01g067860.3	5.44534	2.13091e-06	K00430//peroxidase [EC:1.11.1.7]+ko01100//Metabolic pathways+ko01110//Biosynthesis of secondary metabolites+ko00940//Phenylpropanoid biosynthesis		XP_010320973.2|4.4e-187|PREDICTED: uncharacterized protein LOC101247458 [Solanum lycopersicum]
Solyc08g078930.1	5.41363	2.26694e-11	K11855//ubiquitin carboxyl-terminal hydrolase 36/42 [EC:3.4.19.12]		XP_006355479.1|4.4e-69|PREDICTED: 14 kDa proline-rich protein DC2.15-like [Solanum tuberosum]
Solyc07g009040.3	5.3704	1.34688e-34			XP_015170870.1|6.7e-52|PREDICTED: defensin D1-like isoform X1 [Solanum tuberosum]
Solyc05g055520.1	5.35206	4.62413e-06	K11584//serine/threonine-protein phosphatase 2A regulatory subunit B'+ko03015//mRNA surveillance pathway	GO:0050794//regulation of cellular process;GO:0009987//cellular process;GO:0007154//cell communication;GO:0050789//regulation of biological process;GO:0065007//biological regulation;GO:0051716//cellular response to stimulus;GO:0050896//response to stimulus;GO:0007165//signal transduction;GO:0023052//signaling;GO:1903293//phosphatase complex;GO:0008287//protein serine/threonine phosphatase complex…	XP_015076495.1|8.9e-25|PREDICTED: serine/threonine protein phosphatase 2A 57 kDa regulatory subunit B' beta isoform-like [Solanum pennellii]
Solyc11g018530.2	5.34804	1.26896e-20	K21398//natural resistance-associated macrophage protein 2	GO:0031224//intrinsic component of membrane;GO:0044425//membrane part;GO:0016020//membrane;GO:0016021//integral component of membrane;GO:0005215//transporter activity;	XP_006351140.1|5.7e-297|PREDICTED: metal transporter Nramp5-like [Solanum tuberosum]
Solyc07g009090.3	5.34099	1.71382e-27		GO:0050896//response to stimulus;GO:0006952//defense response;GO:0006950//response to stress;	XP_010323359.1|6.5e-51|PREDICTED: defensin D1-like isoform X3 [Solanum lycopersicum]
Solyc04g011490.3	5.31409	6.2771e-06		GO:0071944//cell periphery;GO:0016020//membrane;GO:0044464//cell part;GO:0044425//membrane part;GO:0005886//plasma membrane;GO:0031224//intrinsic component of membrane;GO:0005623//cell;GO:0016021//integral component of membrane;GO:0051536//iron-sulfur cluster binding;GO:0048037//cofactor binding;GO:0051540//metal cluster binding;GO:0005488//binding;	XP_004236749.1|4.7e-83|PREDICTED: CASP-like protein PIMP1 [Solanum lycopersicum]
Solyc02g069190.3	5.27104	1.43532e-19	K14709//solute carrier family 39 (zinc transporter), member 1/2/3	GO:0034220//ion transmembrane transport;GO:0006810//transport;GO:0072511//divalent inorganic cation transport;GO:0055085//transmembrane transport;GO:0098662//inorganic cation transmembrane transport;GO:0098655//cation transmembrane transport;GO:0006811//ion transport;GO:0006812//cation transport;GO:0070838//divalent metal ion transport;GO:0098660//inorganic ion transmembrane transport;GO:0006829/…	NP_001234252.1|6.1e-179|iron-regulated transporter 2 precursor [Solanum lycopersicum]
Solyc05g053610.2	5.17806	1.04704e-18	K05681//ATP-binding cassette, subfamily G (WHITE), member 2+ko02010//ABC transporters	GO:0006810//transport;GO:0051234//establishment of localization;GO:0051179//localization;GO:0031224//intrinsic component of membrane;GO:0016020//membrane;GO:0016021//integral component of membrane;GO:0044425//membrane part;GO:0036094//small molecule binding;GO:0043167//ion binding;GO:0017111//nucleoside-triphosphatase activity;GO:0032559//adenyl ribonucleotide binding;GO:0016462//pyrophosphatase …	XP_009779532.1|0.0e+00|PREDICTED: pleiotropic drug resistance protein 1-like isoform X1 [Nicotiana sylvestris]
Solyc06g073055.1	5.17803	1.74952e-05	K14664//IAA-amino acid hydrolase [EC:3.5.1.-]	GO:0008152//metabolic process;GO:0016787//hydrolase activity;GO:0003824//catalytic activity;	XP_015077718.1|3.1e-40|PREDICTED: IAA-amino acid hydrolase ILR1-like 5 [Solanum pennellii]
Solyc04g025750.3	5.0917	3.21266e-05	K17500//integrin-linked kinase-associated serine/threonine phosphatase 2C [EC:3.1.3.16]	GO:0016020//membrane;GO:0016021//integral component of membrane;GO:0031224//intrinsic component of membrane;GO:0044425//membrane part;GO:0022857//transmembrane transporter activity;GO:0005215//transporter activity;	XP_015073199.1|1.0e-199|PREDICTED: WAT1-related protein At1g70260-like [Solanum pennellii]
Solyc04g081860.3	5.0917	3.21266e-05	K00430//peroxidase [EC:1.11.1.7]+ko01100//Metabolic pathways+ko01110//Biosynthesis of secondary metabolites+ko00940//Phenylpropanoid biosynthesis	GO:0042743//hydrogen peroxide metabolic process;GO:0071554//cell wall organization or biogenesis;GO:0016043//cellular component organization;GO:0050896//response to stimulus;GO:0072593//reactive oxygen species metabolic process;GO:0042737//drug catabolic process;GO:0006950//response to stress;GO:0044237//cellular metabolic process;GO:0009987//cellular process;GO:0051186//cofactor metabolic proces…	XP_004238381.1|4.6e-178|PREDICTED: peroxidase 64-like [Solanum lycopersicum]
Solyc07g045040.3	5.0917	3.21266e-05	K05278//flavonol synthase [EC:1.14.20.6]+ko01100//Metabolic pathways+ko01110//Biosynthesis of secondary metabolites+ko00941//Flavonoid biosynthesis;K05658//ATP-binding cassette, subfamily B (MDR/TAP), member 1 [EC:7.6.2.2]+ko02010//ABC transporters	GO:0046872//metal ion binding;GO:0016491//oxidoreductase activity;GO:0043167//ion binding;GO:0043169//cation binding;GO:0005488//binding;GO:0003824//catalytic activity;	XP_004243610.1|4.2e-202|PREDICTED: protein SRG1-like [Solanum lycopersicum]
Solyc08g077910.3	5.08711	3.11547e-22	K20628//expansin;K00030//isocitrate dehydrogenase (NAD+) [EC:1.1.1.41]+ko00020//Citrate cycle (TCA cycle)+ko01230//Biosynthesis of amino acids+ko01100//Metabolic pathways+ko01110//Biosynthesis of secondary metabolites+ko01210//2-Oxocarboxylic acid metabolism+ko01200//Carbon metabolism	GO:0005576//extracellular region;	XP_004245822.1|5.1e-148|PREDICTED: expansin-like B1 [Solanum lycopersicum]
Solyc00g072400.3	5.0548	3.99912e-46	K00430//peroxidase [EC:1.11.1.7]+ko01100//Metabolic pathways+ko01110//Biosynthesis of secondary metabolites+ko00940//Phenylpropanoid biosynthesis	GO:0008152//metabolic process;GO:0051187//cofactor catabolic process;GO:0044248//cellular catabolic process;GO:0009056//catabolic process;GO:0051186//cofactor metabolic process;GO:0050896//response to stimulus;GO:0006950//response to stress;GO:0042737//drug catabolic process;GO:0017144//drug metabolic process;GO:0072593//reactive oxygen species metabolic process;GO:0009987//cellular process;GO:00…	XP_004253400.1|2.8e-181|PREDICTED: peroxidase 70 [Solanum lycopersicum]
Solyc10g076243.1	5.0548	3.99912e-46	K00430//peroxidase [EC:1.11.1.7]+ko01100//Metabolic pathways+ko01110//Biosynthesis of secondary metabolites+ko00940//Phenylpropanoid biosynthesis	GO:0008152//metabolic process;GO:0009987//cellular process;GO:0044248//cellular catabolic process;GO:0051187//cofactor catabolic process;GO:0051186//cofactor metabolic process;GO:0042744//hydrogen peroxide catabolic process;GO:0050896//response to stimulus;GO:0042743//hydrogen peroxide metabolic process;GO:0044237//cellular metabolic process;GO:0006950//response to stress;GO:0006979//response to …	XP_004253400.1|2.8e-181|PREDICTED: peroxidase 70 [Solanum lycopersicum]
Solyc05g052420.2	5.00924	9.05147e-09	K14496//abscisic acid receptor PYR/PYL family+ko04016//MAPK signaling pathway - plant+ko04075//Plant hormone signal transduction		XP_004239955.1|5.1e-118|PREDICTED: abscisic acid receptor PYL4-like [Solanum lycopersicum]
Solyc07g005595.1	5.00329	5.81009e-05	K05391//cyclic nucleotide gated channel, plant+ko04626//Plant-pathogen interaction	GO:0042391//regulation of membrane potential;GO:0065007//biological regulation;GO:0065008//regulation of biological quality;GO:0016020//membrane;GO:0031226//intrinsic component of plasma membrane;GO:0016021//integral component of membrane;GO:0044425//membrane part;GO:0005887//integral component of plasma membrane;GO:0044459//plasma membrane part;GO:0031224//intrinsic component of membrane;GO:0071…	XP_006343649.1|5.3e-55|PREDICTED: probable cyclic nucleotide-gated ion channel 5 [Solanum tuberosum]
Solyc07g009060.3	4.98355	1.68299e-23		GO:0006952//defense response;GO:0050896//response to stimulus;GO:0006950//response to stress;	XP_004242838.1|6.5e-52|PREDICTED: defensin D1-like [Solanum lycopersicum]
Solyc06g059880.3	4.92178	9.65026e-05	K01652//acetolactate synthase I/II/III large subunit [EC:2.2.1.6]+ko00290//Valine, leucine and isoleucine biosynthesis+ko00770//Pantothenate and CoA biosynthesis+ko01230//Biosynthesis of amino acids+ko01100//Metabolic pathways+ko00650//Butanoate metabolism+ko01110//Biosynthesis of secondary metabolites+ko01210//2-Oxocarboxylic acid metabolism+ko00660//C5-Branched dibasic acid metabolism	GO:0009097//isoleucine biosynthetic process;GO:0009081//branched-chain amino acid metabolic process;GO:0006549//isoleucine metabolic process;GO:1901564//organonitrogen compound metabolic process;GO:0009987//cellular process;GO:0009058//biosynthetic process;GO:1901607//alpha-amino acid biosynthetic process;GO:0006573//valine metabolic process;GO:0008652//cellular amino acid biosynthetic process;GO…	XP_016575201.1|0.0e+00|PREDICTED: acetolactate synthase 2, chloroplastic-like [Capsicum annuum]
Solyc09g005410.2	4.8834	0.000122059			XP_019071062.1|7.7e-60|PREDICTED: MLP-like protein 34 [Solanum lycopersicum]
Solyc08g076110.2	4.87783	0.000126101			XP_010325593.1|7.5e-32|PREDICTED: protein AE7 isoform X2 [Solanum lycopersicum]
Solyc10g083880.2	4.87665	1.11446e-29	K09873//aquaporin TIP	GO:0006810//transport;GO:0034220//ion transmembrane transport;GO:0055085//transmembrane transport;GO:0051234//establishment of localization;GO:0051179//localization;GO:0006811//ion transport;GO:0031224//intrinsic component of membrane;GO:0005737//cytoplasm;GO:0044425//membrane part;GO:0031226//intrinsic component of plasma membrane;GO:0044459//plasma membrane part;GO:0044446//intracellular organe…	XP_004249473.1|1.5e-137|PREDICTED: aquaporin TIP1-1 [Solanum lycopersicum]
Solyc02g071950.1	4.82867	8.32841e-08			OIT36252.1|7.5e-21|hypothetical protein A4A49_04389 [Nicotiana attenuata]
Solyc11g072200.2	4.82867	0.000167839	K18054//2'-deoxymugineic-acid 2'-dioxygenase / mugineic-acid 3-dioxygenase [EC:1.14.11.24 1.14.11.25]	GO:0005488//binding;GO:0043167//ion binding;GO:0016491//oxidoreductase activity;GO:0046872//metal ion binding;GO:0043169//cation binding;GO:0003824//catalytic activity;GO:0051213//dioxygenase activity;	XP_004251246.1|9.5e-205|PREDICTED: hyoscyamine 6-dioxygenase-like [Solanum lycopersicum]
Solyc01g102380.4	4.81356	3.22268e-106		GO:0051179//localization;GO:0050789//regulation of biological process;GO:0010497//plasmodesmata-mediated intercellular transport;GO:0006810//transport;GO:0051234//establishment of localization;GO:0050793//regulation of developmental process;GO:0051239//regulation of multicellular organismal process;GO:2000026//regulation of multicellular organismal development;GO:0009987//cellular process;GO:2000…	NP_001233861.1|5.1e-123|germin-like protein precursor [Solanum lycopersicum]
Solyc08g079980.1	4.75467	1.09172e-13	K15333//tRNA guanosine-2'-O-methyltransferase [EC:2.1.1.34];K12619//5'-3' exoribonuclease 2 [EC:3.1.13.-]+ko03018//RNA degradation+ko03008//Ribosome biogenesis in eukaryotes;K13199//plasminogen activator inhibitor 1 RNA-binding protein;K14568//rRNA small subunit pseudouridine methyltransferase Nep1 [EC:2.1.1.260]+ko03008//Ribosome biogenesis in eukaryotes;K13124//mitogen-activated protein kinase …	GO:0008233//peptidase activity;GO:0008236//serine-type peptidase activity;GO:0140096//catalytic activity, acting on a protein;GO:0003824//catalytic activity;GO:0004175//endopeptidase activity;GO:0004252//serine-type endopeptidase activity;GO:0070011//peptidase activity, acting on L-amino acid peptides;GO:0016787//hydrolase activity;GO:0017171//serine hydrolase activity;	XP_019070598.1|0.0e+00|PREDICTED: subtilisin-like protease SBT1.7 [Solanum lycopersicum]
Solyc01g111933.1	4.75061	0.000261483	K10418//dynein light chain LC8-type	GO:0017048//Rho GTPase binding;GO:0019899//enzyme binding;GO:0098772//molecular function regulator;GO:0005515//protein binding;GO:0017016//Ras GTPase binding;GO:0051020//GTPase binding;GO:0005488//binding;GO:0005085//guanyl-nucleotide exchange factor activity;GO:0005088//Ras guanyl-nucleotide exchange factor activity;GO:0005089//Rho guanyl-nucleotide exchange factor activity;GO:0031267//small GTP…	XP_004231073.1|1.6e-71|PREDICTED: rop guanine nucleotide exchange factor 1 [Solanum lycopersicum]
Solyc06g054600.2	4.7496	0.000262906	K13832//3-dehydroquinate dehydratase / shikimate dehydrogenase [EC:4.2.1.10 1.1.1.25]+ko01230//Biosynthesis of amino acids+ko01100//Metabolic pathways+ko01110//Biosynthesis of secondary metabolites+ko00400//Phenylalanine, tyrosine and tryptophan biosynthesis;K15308//tristetraprolin;K23048//RING finger protein unkempt		XP_019069849.1|3.2e-62|PREDICTED: zinc finger CCCH domain-containing protein 32-like [Solanum lycopersicum]
Solyc09g008590.3	4.72913	0.000293901			XP_004246908.2|8.7e-83|PREDICTED: pistil-specific extensin-like protein [Solanum lycopersicum]
Solyc07g009080.3	4.68021	1.02999e-28		GO:0050896//response to stimulus;GO:0006952//defense response;GO:0006950//response to stress;	XP_004242840.1|1.7e-40|PREDICTED: defensin D1-like isoform X2 [Solanum lycopersicum]
Solyc07g009070.3	4.65231	1.95178e-23		GO:0006952//defense response;GO:0006950//response to stress;GO:0050896//response to stimulus;	XP_004242839.1|2.1e-52|PREDICTED: defensin D1-like isoform X1 [Solanum lycopersicum]
Solyc08g075830.3	4.65133	9.8649e-13	K00430//peroxidase [EC:1.11.1.7]+ko01100//Metabolic pathways+ko01110//Biosynthesis of secondary metabolites+ko00940//Phenylpropanoid biosynthesis	GO:0044237//cellular metabolic process;GO:0072593//reactive oxygen species metabolic process;GO:0071555//cell wall organization;GO:0051186//cofactor metabolic process;GO:0006950//response to stress;GO:0016043//cellular component organization;GO:0071840//cellular component organization or biogenesis;GO:0042737//drug catabolic process;GO:0071554//cell wall organization or biogenesis;GO:0051187//cof…	XP_004245974.1|1.1e-184|PREDICTED: peroxidase 27-like [Solanum lycopersicum]
Solyc10g080510.1	4.62222	7.79444e-07	K04733//interleukin-1 receptor-associated kinase 4 [EC:2.7.11.1]	GO:0016020//membrane;GO:0044425//membrane part;GO:0031224//intrinsic component of membrane;GO:0016021//integral component of membrane;GO:0097159//organic cyclic compound binding;GO:0032559//adenyl ribonucleotide binding;GO:0017076//purine nucleotide binding;GO:1901363//heterocyclic compound binding;GO:1901265//nucleoside phosphate binding;GO:0032553//ribonucleotide binding;GO:0097367//carbohydrat…	NP_001307923.1|0.0e+00|clade XII lectin receptor kinase [Solanum lycopersicum]
Solyc10g084600.2	4.62222	0.000513618	K01513//ectonucleotide pyrophosphatase/phosphodiesterase family member 1/3 [EC:3.1.4.1 3.6.1.9]+ko00740//Riboflavin metabolism+ko00230//Purine metabolism+ko00770//Pantothenate and CoA biosynthesis+ko01100//Metabolic pathways+ko00760//Nicotinate and nicotinamide metabolism+ko00500//Starch and sucrose metabolism+ko00240//Pyrimidine metabolism;K14317//nuclear pore complex protein Nup214+ko03013//RNA…		XP_004249525.1|9.4e-56|PREDICTED: MATH and LRR domain-containing protein PFE0570w-like [Solanum lycopersicum]
Solyc03g121200.3	4.62222	0.000513618
Solyc06g073480.3	4.62222	0.000513618			XP_019069870.1|0.0e+00|PREDICTED: BTB/POZ domain-containing protein At5g17580-like [Solanum lycopersicum]
Solyc04g007750.3	4.58474	1.24397e-17		GO:0006950//response to stress;GO:0050896//response to stimulus;GO:0006952//defense response;GO:0009607//response to biotic stimulus;	XP_004237029.1|5.6e-82|PREDICTED: kirola-like [Solanum lycopersicum]
Solyc03g117700.2	4.54119	0.000766652	K01381//saccharopepsin [EC:3.4.23.25];K22683//aspartyl protease family protein [EC:3.4.23.-]	GO:0016787//hydrolase activity;GO:0004175//endopeptidase activity;GO:0140096//catalytic activity, acting on a protein;GO:0070001//aspartic-type peptidase activity;GO:0008233//peptidase activity;GO:0004190//aspartic-type endopeptidase activity;GO:0003824//catalytic activity;GO:0070011//peptidase activity, acting on L-amino acid peptides;	XP_004235884.1|6.0e-222|PREDICTED: aspartyl protease family protein At5g10770-like [Solanum lycopersicum]
Solyc07g009030.3	4.51082	1.95201e-45			XP_015081705.1|3.0e-51|PREDICTED: defensin D1-like [Solanum pennellii]
Solyc12g096620.1	4.50674	2.41575e-06	K01206//alpha-L-fucosidase [EC:3.2.1.51]+ko00511//Other glycan degradation	GO:0016788//hydrolase activity, acting on ester bonds;GO:0016787//hydrolase activity;GO:0003824//catalytic activity;	XP_010314861.1|1.2e-225|PREDICTED: acetylajmalan esterase-like [Solanum lycopersicum]
Solyc06g075970.3	4.50674	0.000903742		GO:0031224//intrinsic component of membrane;GO:0016021//integral component of membrane;GO:0016020//membrane;GO:0044425//membrane part;	XP_004241239.1|0.0e+00|PREDICTED: uncharacterized protein LOC101251992 [Solanum lycopersicum]
Solyc09g089780.3	4.50674	0.000903742	K13229//2,4-dihydroxy-1,4-benzoxazin-3-one-glucoside dioxygenase [EC:1.14.11.59]+ko00402//Benzoxazinoid biosynthesis;K06892//feruloyl-CoA ortho-hydroxylase [EC:1.14.11.-]+ko01110//Biosynthesis of secondary metabolites+ko00940//Phenylpropanoid biosynthesis	GO:0043169//cation binding;GO:0043167//ion binding;GO:0016491//oxidoreductase activity;GO:0005488//binding;GO:0046872//metal ion binding;GO:0003824//catalytic activity;	XP_004247707.1|2.3e-201|PREDICTED: deacetoxyvindoline 4-hydroxylase [Solanum lycopersicum]
Solyc10g080410.2	4.50674	0.000903742	K14431//transcription factor TGA+ko04075//Plant hormone signal transduction	GO:0034641//cellular nitrogen compound metabolic process;GO:0008152//metabolic process;GO:0018130//heterocycle biosynthetic process;GO:0016070//RNA metabolic process;GO:0006351//transcription, DNA-templated;GO:0006139//nucleobase-containing compound metabolic process;GO:0006725//cellular aromatic compound metabolic process;GO:0009058//biosynthetic process;GO:0044260//cellular macromolecule metabo…	XP_010312148.1|2.7e-63|PREDICTED: transcription factor TGA2.2-like isoform X1 [Solanum lycopersicum]
Solyc02g071560.3	4.48249	1.76117e-26	K15333//tRNA guanosine-2'-O-methyltransferase [EC:2.1.1.34];K13199//plasminogen activator inhibitor 1 RNA-binding protein;K12619//5'-3' exoribonuclease 2 [EC:3.1.13.-]+ko03018//RNA degradation+ko03008//Ribosome biogenesis in eukaryotes;K14568//rRNA small subunit pseudouridine methyltransferase Nep1 [EC:2.1.1.260]+ko03008//Ribosome biogenesis in eukaryotes	GO:0070011//peptidase activity, acting on L-amino acid peptides;GO:0008233//peptidase activity;GO:0017171//serine hydrolase activity;GO:0004252//serine-type endopeptidase activity;GO:0003824//catalytic activity;GO:0008236//serine-type peptidase activity;GO:0016787//hydrolase activity;GO:0140096//catalytic activity, acting on a protein;GO:0004175//endopeptidase activity;	XP_004232982.1|0.0e+00|PREDICTED: subtilisin-like protease SBT5.6 [Solanum lycopersicum]
Solyc12g088970.1	4.44534	6.46737e-16	K23136//fraxetin 5-hydroxylase [EC:1.14.14.164]	GO:0008152//metabolic process;GO:0019748//secondary metabolic process;GO:0009058//biosynthetic process;GO:0044550//secondary metabolite biosynthetic process;GO:0031224//intrinsic component of membrane;GO:0044425//membrane part;GO:0016020//membrane;GO:0016021//integral component of membrane;GO:0020037//heme binding;GO:0005506//iron ion binding;GO:0046914//transition metal ion binding;GO:0048037//c…	XP_004252778.1|7.9e-311|PREDICTED: cytochrome P450 82C4-like [Solanum lycopersicum]
Solyc11g069900.2	4.44534	5.25321e-11			OIS96546.1|6.2e-11|hypothetical protein A4A49_31951 [Nicotiana attenuata]
Solyc01g109390.3	4.38121	7.48478e-06	K02605//origin recognition complex subunit 3		XP_004230985.1|1.5e-53|PREDICTED: putative lipid-transfer protein DIR1 [Solanum lycopersicum]
Solyc03g043710.1	4.38121	7.48478e-06	K04733//interleukin-1 receptor-associated kinase 4 [EC:2.7.11.1]	GO:0016020//membrane;GO:0031224//intrinsic component of membrane;GO:0016021//integral component of membrane;GO:0044425//membrane part;GO:0016301//kinase activity;GO:0030554//adenyl nucleotide binding;GO:0032555//purine ribonucleotide binding;GO:0016773//phosphotransferase activity, alcohol group as acceptor;GO:0004672//protein kinase activity;GO:0016772//transferase activity, transferring phospho…	AKV93716.1|0.0e+00|clade IX lectin receptor kinase [Solanum lycopersicum]
Solyc12g098540.2	4.38121	7.48478e-06	K14641//apyrase [EC:3.6.1.5]+ko00230//Purine metabolism+ko00240//Pyrimidine metabolism	GO:0003824//catalytic activity;GO:0016787//hydrolase activity;	XP_004252980.1|4.0e-265|PREDICTED: apyrase [Solanum lycopersicum]
Solyc01g066970.2	4.34804	2.86294e-10	K14416//elongation factor 1 alpha-like protein+ko03015//mRNA surveillance pathway		XP_004229231.1|1.9e-55|PREDICTED: flowering-promoting factor 1-like protein 3 [Solanum lycopersicum]
Solyc06g005620.3	4.31409	1.31475e-05	K14709//solute carrier family 39 (zinc transporter), member 1/2/3	GO:0051179//localization;GO:0006812//cation transport;GO:0072511//divalent inorganic cation transport;GO:0070838//divalent metal ion transport;GO:0098660//inorganic ion transmembrane transport;GO:0006811//ion transport;GO:0006810//transport;GO:0006829//zinc ion transport;GO:0071577//zinc ion transmembrane transport;GO:0000041//transition metal ion transport;GO:0030001//metal ion transport;GO:0051…	NP_001309762.1|1.5e-191|zinc transporter precursor [Solanum lycopersicum]
Solyc02g071410.3	4.2927	2.35964e-08	K05658//ATP-binding cassette, subfamily B (MDR/TAP), member 1 [EC:7.6.2.2]+ko02010//ABC transporters;K05278//flavonol synthase [EC:1.14.20.6]+ko01100//Metabolic pathways+ko01110//Biosynthesis of secondary metabolites+ko00941//Flavonoid biosynthesis;K06892//feruloyl-CoA ortho-hydroxylase [EC:1.14.11.-]+ko01110//Biosynthesis of secondary metabolites+ko00940//Phenylpropanoid biosynthesis	GO:0016491//oxidoreductase activity;GO:0043167//ion binding;GO:0043169//cation binding;GO:0046872//metal ion binding;GO:0003824//catalytic activity;GO:0005488//binding;	XP_019067810.1|3.8e-206|PREDICTED: protein SRG1-like [Solanum lycopersicum]
Solyc01g015080.3	4.24371	5.50725e-43	K00430//peroxidase [EC:1.11.1.7]+ko01100//Metabolic pathways+ko01110//Biosynthesis of secondary metabolites+ko00940//Phenylpropanoid biosynthesis	GO:0009056//catabolic process;GO:0006979//response to oxidative stress;GO:0008152//metabolic process;GO:0072593//reactive oxygen species metabolic process;GO:0051187//cofactor catabolic process;GO:0042744//hydrogen peroxide catabolic process;GO:0009987//cellular process;GO:0006950//response to stress;GO:0042737//drug catabolic process;GO:0044237//cellular metabolic process;GO:0050896//response to…	XP_004228346.1|3.1e-187|PREDICTED: peroxidase N [Solanum lycopersicum]
Solyc08g078910.1	4.24371	2.30908e-05	K11855//ubiquitin carboxyl-terminal hydrolase 36/42 [EC:3.4.19.12]		XP_004245750.1|7.9e-71|PREDICTED: 14 kDa proline-rich protein DC2.15-like [Solanum lycopersicum]
Solyc09g090010.3	4.24371	2.30908e-05		GO:0044464//cell part;GO:0005618//cell wall;GO:0071944//cell periphery;GO:0005576//extracellular region;GO:0005623//cell;GO:0030312//external encapsulating structure;GO:0046914//transition metal ion binding;GO:0005488//binding;GO:0045735//nutrient reservoir activity;GO:0030145//manganese ion binding;GO:0043167//ion binding;GO:0043169//cation binding;GO:0046872//metal ion binding;	XP_004247722.1|8.0e-124|PREDICTED: germin-like protein subfamily 1 member 19 [Solanum lycopersicum]
Solyc01g008410.2	4.23508	3.21898e-10	K19613//leucine-rich repeat protein SHOC2;K13420//LRR receptor-like serine/threonine-protein kinase FLS2 [EC:2.7.11.1]+ko04016//MAPK signaling pathway - plant+ko04626//Plant-pathogen interaction	GO:0016020//membrane;GO:0016021//integral component of membrane;GO:0044425//membrane part;GO:0031224//intrinsic component of membrane;	AAV41387.1|5.0e-220|Hcr9-Avr4-chl1 [Solanum chilense]
Solyc05g052670.1	4.20939	5.83216e-76	K22889//trichothecene 3-O-acetyltransferase [EC:2.3.1.-]	GO:0016747//transferase activity, transferring acyl groups other than amino-acyl groups;GO:0016746//transferase activity, transferring acyl groups;GO:0003824//catalytic activity;GO:0016740//transferase activity;	XP_004239936.1|3.1e-271|PREDICTED: BAHD acyltransferase DCR-like [Solanum lycopersicum]
Solyc05g046000.3	4.20718	2.74208e-09	K00430//peroxidase [EC:1.11.1.7]+ko01100//Metabolic pathways+ko01110//Biosynthesis of secondary metabolites+ko00940//Phenylpropanoid biosynthesis	GO:0051186//cofactor metabolic process;GO:0006950//response to stress;GO:0072593//reactive oxygen species metabolic process;GO:0044248//cellular catabolic process;GO:0017144//drug metabolic process;GO:0071554//cell wall organization or biogenesis;GO:0045229//external encapsulating structure organization;GO:0009056//catabolic process;GO:0071555//cell wall organization;GO:0042744//hydrogen peroxide…	XP_004240143.1|2.8e-177|PREDICTED: peroxidase 27-like [Solanum lycopersicum]
Solyc10g085940.1	4.1697	4.08051e-05		GO:0016301//kinase activity;GO:0003824//catalytic activity;GO:0016772//transferase activity, transferring phosphorus-containing groups;GO:0016740//transferase activity;	XP_004249832.1|1.5e-136|PREDICTED: probable membrane-associated kinase regulator 3 [Solanum lycopersicum]
Solyc06g005470.3	4.16279	6.5483e-217		GO:0005488//binding;GO:0043167//ion binding;GO:0046872//metal ion binding;GO:0043169//cation binding;	Q43515.1|2.4e-45|RecName: Full=Metallothionein-like protein type 2
Solyc01g079960.2	4.14302	1.72014e-05	K22683//aspartyl protease family protein [EC:3.4.23.-]	GO:0006508//proteolysis;GO:0030163//protein catabolic process;GO:0043170//macromolecule metabolic process;GO:1901564//organonitrogen compound metabolic process;GO:0071704//organic substance metabolic process;GO:0019538//protein metabolic process;GO:1901575//organic substance catabolic process;GO:0008152//metabolic process;GO:0009056//catabolic process;GO:0006807//nitrogen compound metabolic proce…	XP_004229432.1|5.8e-258|PREDICTED: basic 7S globulin-like [Solanum lycopersicum]
Solyc04g051360.3	4.12918	1.59922e-73	K12900//FUS-interacting serine-arginine-rich protein 1+ko03040//Spliceosome;K09286//EREBP-like factor	GO:0044260//cellular macromolecule metabolic process;GO:0006351//transcription, DNA-templated;GO:0044237//cellular metabolic process;GO:0034654//nucleobase-containing compound biosynthetic process;GO:0010467//gene expression;GO:0018130//heterocycle biosynthetic process;GO:0046483//heterocycle metabolic process;GO:0006807//nitrogen compound metabolic process;GO:0009058//biosynthetic process;GO:190…	XP_004237483.1|3.8e-174|PREDICTED: ethylene-responsive transcription factor ABR1-like [Solanum lycopersicum]
Solyc12g005790.2	4.11949	5.90281e-05	K00430//peroxidase [EC:1.11.1.7]+ko01100//Metabolic pathways+ko01110//Biosynthesis of secondary metabolites+ko00940//Phenylpropanoid biosynthesis	GO:0045229//external encapsulating structure organization;GO:0042743//hydrogen peroxide metabolic process;GO:0016043//cellular component organization;GO:0042744//hydrogen peroxide catabolic process;GO:0009987//cellular process;GO:0071555//cell wall organization;GO:0009056//catabolic process;GO:0051187//cofactor catabolic process;GO:0071669//plant-type cell wall organization or biogenesis;GO:00427…	XP_004251512.1|7.0e-183|PREDICTED: peroxidase 27-like [Solanum lycopersicum]
Solyc10g084120.2	4.10169	1.05346e-60	K09872//aquaporin PIP	GO:0006811//ion transport;GO:0051234//establishment of localization;GO:0034220//ion transmembrane transport;GO:0055085//transmembrane transport;GO:0006810//transport;GO:0051179//localization;GO:0044425//membrane part;GO:0016021//integral component of membrane;GO:0005623//cell;GO:0031226//intrinsic component of plasma membrane;GO:0005887//integral component of plasma membrane;GO:0044459//plasma me…	NP_001274308.1|2.8e-161|aquaporin PIP2-1-like [Solanum lycopersicum]
Solyc08g068660.1	4.0917	7.17221e-05	K22427//phenylalanine decarboxylase [EC:4.1.1.53]+ko00360//Phenylalanine metabolism	GO:0044281//small molecule metabolic process;GO:0009987//cellular process;GO:0019752//carboxylic acid metabolic process;GO:0071704//organic substance metabolic process;GO:0044237//cellular metabolic process;GO:0008152//metabolic process;GO:0006082//organic acid metabolic process;GO:0043436//oxoacid metabolic process;GO:0036094//small molecule binding;GO:0019842//vitamin binding;GO:0016831//carbox…	XP_004245427.1|7.0e-32|PREDICTED: histidine decarboxylase-like [Solanum lycopersicum]
Solyc01g109140.3	4.0917	7.17221e-05	K17874//9-divinyl ether synthase [EC:4.2.1.121]	GO:0044238//primary metabolic process;GO:0071704//organic substance metabolic process;GO:1901615//organic hydroxy compound metabolic process;GO:0006629//lipid metabolic process;GO:0008202//steroid metabolic process;GO:0008152//metabolic process;GO:0016125//sterol metabolic process;GO:1901360//organic cyclic compound metabolic process;GO:0016836//hydro-lyase activity;GO:0043167//ion binding;GO:190…	NP_001234527.1|3.1e-280|9-divinyl ether synthase [Solanum lycopersicum]
Solyc06g073585.1	4.0917	7.17221e-05	K22547//arsenate reductase [EC:1.20.4.1]		XP_010322964.2|1.5e-20|PREDICTED: rhodanese-like domain-containing protein 19, mitochondrial isoform X1 [Solanum lycopersicum]
Solyc01g080960.3	4.0917	7.17221e-05	K23047//E3 ubiquitin-protein ligase UNKL [EC:2.3.2.27]	GO:0043226//organelle;GO:0043229//intracellular organelle;GO:0043231//intracellular membrane-bounded organelle;GO:0005634//nucleus;GO:0005623//cell;GO:0044464//cell part;GO:0044424//intracellular part;GO:0043227//membrane-bounded organelle;GO:0005622//intracellular;GO:0043565//sequence-specific DNA binding;GO:0140110//transcription regulator activity;GO:0003677//DNA binding;GO:1990837//sequence-s…	XP_004229513.1|1.1e-117|PREDICTED: AT-hook motif nuclear-localized protein 23 [Solanum lycopersicum]
Solyc05g005850.3	4.0917	7.17221e-05	K17500//integrin-linked kinase-associated serine/threonine phosphatase 2C [EC:3.1.3.16]		XP_019069437.1|1.7e-193|PREDICTED: WAT1-related protein At1g21890-like [Solanum lycopersicum]
Solyc08g061920.2	4.08608	7.46387e-05	K00279//cytokinin dehydrogenase [EC:1.5.99.12]+ko00908//Zeatin biosynthesis	GO:0034754//cellular hormone metabolic process;GO:0065007//biological regulation;GO:0009987//cellular process;GO:0042445//hormone metabolic process;GO:0006725//cellular aromatic compound metabolic process;GO:0008152//metabolic process;GO:0006807//nitrogen compound metabolic process;GO:1901564//organonitrogen compound metabolic process;GO:0044237//cellular metabolic process;GO:0009308//amine metab…	NP_001307268.1|3.9e-311|cytokinin oxidase/dehydrogenase 3 precursor [Solanum lycopersicum]
Solyc07g009050.3	4.07612	5.729e-20		GO:0050896//response to stimulus;GO:0006950//response to stress;GO:0006952//defense response;	XP_015081884.1|7.0e-49|PREDICTED: defensin D1-like [Solanum pennellii]
Solyc07g009100.3	4.05186	5.25728e-25		GO:0006950//response to stress;GO:0050896//response to stimulus;GO:0006952//defense response;	XP_004242842.1|6.6e-52|PREDICTED: defensin D1-like isoform X1 [Solanum lycopersicum]
Solyc02g087090.3	4.02332	1.18666e-07	K10529//alpha-dioxygenase [EC:1.-.-.-]+ko00592//alpha-Linolenic acid metabolism	GO:0006950//response to stress;GO:0050896//response to stimulus;GO:0006979//response to oxidative stress;GO:0004601//peroxidase activity;GO:0051213//dioxygenase activity;GO:0048037//cofactor binding;GO:0046906//tetrapyrrole binding;GO:1901363//heterocyclic compound binding;GO:0016491//oxidoreductase activity;GO:0097159//organic cyclic compound binding;GO:0005488//binding;GO:0020037//heme binding;…	NP_001234414.1|2.8e-235|alpha-DOX2 [Solanum lycopersicum]
Solyc06g067860.3	4.00924	0.000126116	K04124//gibberellin 3beta-dioxygenase [EC:1.14.11.15]+ko00904//Diterpenoid biosynthesis+ko01110//Biosynthesis of secondary metabolites;K05282//gibberellin-44 dioxygenase [EC:1.14.11.12]+ko00904//Diterpenoid biosynthesis+ko01100//Metabolic pathways+ko01110//Biosynthesis of secondary metabolites	GO:0051213//dioxygenase activity;GO:0043169//cation binding;GO:0005488//binding;GO:0043167//ion binding;GO:0003824//catalytic activity;GO:0046872//metal ion binding;GO:0016491//oxidoreductase activity;	XP_004241717.1|3.1e-185|PREDICTED: probable 2-oxoglutarate-dependent dioxygenase AOP1 [Solanum lycopersicum]
Solyc06g074990.2	4.00924	0.000126116	K02575//MFS transporter, NNP family, nitrate/nitrite transporter+ko00910//Nitrogen metabolism	GO:0051234//establishment of localization;GO:0006810//transport;GO:0055085//transmembrane transport;GO:0051179//localization;GO:0044425//membrane part;GO:0031224//intrinsic component of membrane;GO:0016021//integral component of membrane;GO:0016020//membrane;	XP_016577863.1|5.5e-267|PREDICTED: high-affinity nitrate transporter 2.1-like [Capsicum annuum]
Solyc04g010270.1	4.00924	0.000126116	K10775//phenylalanine ammonia-lyase [EC:4.3.1.24]+ko01100//Metabolic pathways+ko01110//Biosynthesis of secondary metabolites+ko00940//Phenylpropanoid biosynthesis+ko00360//Phenylalanine metabolism;K01870//isoleucyl-tRNA synthetase [EC:6.1.1.5]+ko00970//Aminoacyl-tRNA biosynthesis;K22020//mucin-19	GO:0048046//apoplast;GO:0005576//extracellular region;GO:0003824//catalytic activity;GO:0016853//isomerase activity;	XP_004236764.1|5.4e-232|PREDICTED: dirigent protein 24-like [Solanum lycopersicum]
Solyc05g050510.3	4.00924	0.000126116		GO:0044425//membrane part;GO:0031224//intrinsic component of membrane;GO:0016021//integral component of membrane;GO:0016020//membrane;GO:0046872//metal ion binding;GO:0043169//cation binding;GO:0005488//binding;GO:0043167//ion binding;	XP_004240076.1|6.8e-62|PREDICTED: protein yippee-like At4g27745 [Solanum lycopersicum]
Solyc09g057960.1	3.94261	5.76809e-28	K04733//interleukin-1 receptor-associated kinase 4 [EC:2.7.11.1]	GO:0050896//response to stimulus;GO:0009628//response to abiotic stimulus;GO:0080167//response to karrikin;	XP_004247276.1|2.8e-152|PREDICTED: cysteine-rich repeat secretory protein 55-like [Solanum lycopersicum]
Solyc07g055670.1	3.92178	4.00162e-17	K04733//interleukin-1 receptor-associated kinase 4 [EC:2.7.11.1]	GO:0009856//pollination;GO:0032501//multicellular organismal process;GO:0044706//multi-multicellular organism process;GO:0009875//pollen-pistil interaction;GO:0051704//multi-organism process;GO:0009987//cellular process;GO:0000003//reproduction;GO:0007154//cell communication;GO:0048544//recognition of pollen;GO:0008037//cell recognition;GO:0022414//reproductive process;GO:0031224//intrinsic compo…	XP_019070502.1|4.5e-133|PREDICTED: G-type lectin S-receptor-like serine/threonine-protein kinase SD2-5 [Solanum lycopersicum]
Solyc03g111880.3	3.92178	0.000222302	K00512//steroid 17alpha-monooxygenase / 17alpha-hydroxyprogesterone deacetylase [EC:1.14.14.19 1.14.14.32]+ko01100//Metabolic pathways	GO:0044425//membrane part;GO:0016020//membrane;GO:0016021//integral component of membrane;GO:0031224//intrinsic component of membrane;GO:0046914//transition metal ion binding;GO:0016705//oxidoreductase activity, acting on paired donors, with incorporation or reduction of molecular oxygen;GO:0046872//metal ion binding;GO:0046906//tetrapyrrole binding;GO:1901363//heterocyclic compound binding;GO:00…	XP_004236286.2|0.0e+00|PREDICTED: LOW QUALITY PROTEIN: uncharacterized protein LOC101249540 [Solanum lycopersicum]
Solyc01g090610.3	3.90652	6.94607e-17	K04125//gibberellin 2beta-dioxygenase [EC:1.14.11.13]+ko00904//Diterpenoid biosynthesis+ko01110//Biosynthesis of secondary metabolites	GO:0043167//ion binding;GO:0043169//cation binding;GO:0016491//oxidoreductase activity;GO:0003824//catalytic activity;GO:0046872//metal ion binding;GO:0005488//binding;	XP_004229768.1|3.8e-185|PREDICTED: 2-oxoglutarate-dependent dioxygenase AOP2 [Solanum lycopersicum]
Solyc04g074030.3	3.88386	9.4007e-233	K20718//LRR receptor-like serine/threonine-protein kinase ERECTA [EC:2.7.11.1]+ko04016//MAPK signaling pathway - plant;K00924//kinase [EC:2.7.1.-]	GO:0044425//membrane part;GO:0016020//membrane;GO:0031224//intrinsic component of membrane;GO:0016021//integral component of membrane;GO:0000166//nucleotide binding;GO:0032553//ribonucleotide binding;GO:0035639//purine ribonucleoside triphosphate binding;GO:0030554//adenyl nucleotide binding;GO:0043168//anion binding;GO:0032555//purine ribonucleotide binding;GO:0016301//kinase activity;GO:0016772…	XP_010320166.2|0.0e+00|PREDICTED: LOW QUALITY PROTEIN: MDIS1-interacting receptor like kinase 2-like [Solanum lycopersicum]
Solyc01g102900.3	3.86931	1.61545e-22	K00384//thioredoxin reductase (NADPH) [EC:1.8.1.9]+ko00450//Selenocompound metabolism	GO:0030312//external encapsulating structure;GO:0044464//cell part;GO:0005618//cell wall;GO:0005576//extracellular region;GO:0071944//cell periphery;GO:0005623//cell;GO:0045735//nutrient reservoir activity;GO:0043167//ion binding;GO:0046914//transition metal ion binding;GO:0043169//cation binding;GO:0030145//manganese ion binding;GO:0005488//binding;GO:0046872//metal ion binding;	XP_004230404.1|4.1e-128|PREDICTED: putative germin-like protein 2-1 [Solanum lycopersicum]
Solyc02g064970.3	3.84913	3.54971e-43	K00430//peroxidase [EC:1.11.1.7]+ko01100//Metabolic pathways+ko01110//Biosynthesis of secondary metabolites+ko00940//Phenylpropanoid biosynthesis	GO:0017144//drug metabolic process;GO:0050896//response to stimulus;GO:0042744//hydrogen peroxide catabolic process;GO:0071840//cellular component organization or biogenesis;GO:0044248//cellular catabolic process;GO:0042737//drug catabolic process;GO:0045229//external encapsulating structure organization;GO:0071669//plant-type cell wall organization or biogenesis;GO:0051186//cofactor metabolic pr…	XP_015065176.1|3.4e-194|PREDICTED: peroxidase 25 [Solanum pennellii]
Solyc09g092700.3	3.83746	9.5005e-05			XP_004247909.1|1.6e-63|PREDICTED: glycine-rich cell wall structural protein-like [Solanum lycopersicum]
Solyc01g006310.3	3.82867	0.000390763	K00430//peroxidase [EC:1.11.1.7]+ko01100//Metabolic pathways+ko01110//Biosynthesis of secondary metabolites+ko00940//Phenylpropanoid biosynthesis	GO:0044237//cellular metabolic process;GO:0006950//response to stress;GO:0072593//reactive oxygen species metabolic process;GO:0051186//cofactor metabolic process;GO:0044248//cellular catabolic process;GO:0051187//cofactor catabolic process;GO:0042743//hydrogen peroxide metabolic process;GO:0042737//drug catabolic process;GO:0042744//hydrogen peroxide catabolic process;GO:0009987//cellular proces…	XP_004228694.1|1.9e-188|PREDICTED: peroxidase N-like isoform X1 [Solanum lycopersicum]
Solyc04g007030.3	3.82347	9.57237e-52	K13457//disease resistance protein RPM1+ko04626//Plant-pathogen interaction	GO:0009987//cellular process;GO:0006952//defense response;GO:0051716//cellular response to stimulus;GO:0007165//signal transduction;GO:0050789//regulation of biological process;GO:0023052//signaling;GO:0007154//cell communication;GO:0006950//response to stress;GO:0065007//biological regulation;GO:0050794//regulation of cellular process;GO:0050896//response to stimulus;GO:0005886//plasma membrane;…	XP_004236959.1|0.0e+00|PREDICTED: putative late blight resistance protein homolog R1A-3 [Solanum lycopersicum]
Solyc01g105650.3	3.81253	2.02214e-56	K05278//flavonol synthase [EC:1.14.20.6]+ko01100//Metabolic pathways+ko01110//Biosynthesis of secondary metabolites+ko00941//Flavonoid biosynthesis	GO:0003824//catalytic activity;GO:0043169//cation binding;GO:0046872//metal ion binding;GO:0005488//binding;GO:0043167//ion binding;GO:0016491//oxidoreductase activity;	XP_004230628.1|6.0e-210|PREDICTED: protein DMR6-LIKE OXYGENASE 2-like [Solanum lycopersicum]
Solyc01g089855.1	3.81224	1.24766e-19			XP_010325181.1|1.8e-51|PREDICTED: histone-lysine N-methyltransferase SETD1B [Solanum lycopersicum]
Solyc10g086100.2	3.80279	2.11462e-44		GO:0050896//response to stimulus;GO:0009611//response to wounding;GO:0006950//response to stress;GO:0061134//peptidase regulator activity;GO:0004857//enzyme inhibitor activity;GO:0030234//enzyme regulator activity;GO:0098772//molecular function regulator;GO:0061135//endopeptidase regulator activity;GO:0030414//peptidase inhibitor activity;GO:0004866//endopeptidase inhibitor activity;GO:0004867//s…	XP_004249682.1|6.4e-46|PREDICTED: trypsin inhibitor 1-like [Solanum lycopersicum]
Solyc08g062340.3	3.79707	1.24522e-12	K13993//HSP20 family protein+ko04141//Protein processing in endoplasmic reticulum		NP_001234130.2|9.0e-82|cytosolic class II small heat shock protein HCT2 [Solanum lycopersicum]
Solyc08g016582.1	3.73243	1.0513e-14			XP_015078157.1|5.0e-149|PREDICTED: uncharacterized protein LOC107021961 [Solanum pennellii]
Solyc06g062450.3	3.72913	1.39767e-06	K04733//interleukin-1 receptor-associated kinase 4 [EC:2.7.11.1];K16224//senescence-induced receptor-like serine/threonine-protein kinase+ko04016//MAPK signaling pathway - plant+ko04626//Plant-pathogen interaction	GO:0016740//transferase activity;GO:0003824//catalytic activity;GO:0016301//kinase activity;GO:0016772//transferase activity, transferring phosphorus-containing groups;	XP_004241948.1|9.4e-214|PREDICTED: putative leucine-rich repeat receptor-like protein kinase At2g19210 [Solanum lycopersicum]
Solyc08g074690.3	3.72913	1.39767e-06	K00422//polyphenol oxidase [EC:1.10.3.1]+ko00350//Tyrosine metabolism+ko01100//Metabolic pathways+ko00950//Isoquinoline alkaloid biosynthesis+ko01110//Biosynthesis of secondary metabolites	GO:0046148//pigment biosynthetic process;GO:0042440//pigment metabolic process;GO:0008152//metabolic process;GO:0043167//ion binding;GO:0005488//binding;GO:0004097//catechol oxidase activity;GO:0016491//oxidoreductase activity;GO:0043169//cation binding;GO:0016682//oxidoreductase activity, acting on diphenols and related substances as donors, oxygen as acceptor;GO:0016679//oxidoreductase activity…	XP_004246041.1|0.0e+00|PREDICTED: polyphenol oxidase E, chloroplastic-like [Solanum lycopersicum]
Solyc04g080250.3	3.72913	0.00068782	K01520//dUTP pyrophosphatase [EC:3.6.1.23]+ko01100//Metabolic pathways+ko00240//Pyrimidine metabolism	GO:1901137//carbohydrate derivative biosynthetic process;GO:0006725//cellular aromatic compound metabolic process;GO:0009176//pyrimidine deoxyribonucleoside monophosphate metabolic process;GO:0009130//pyrimidine nucleoside monophosphate biosynthetic process;GO:0006796//phosphate-containing compound metabolic process;GO:0018130//heterocycle biosynthetic process;GO:0009394//2'-deoxyribonucleotide m…	XP_004238249.1|5.0e-79|PREDICTED: deoxyuridine 5'-triphosphate nucleotidohydrolase [Solanum lycopersicum]
Solyc01g009935.1	3.72913	0.00068782	K14488//SAUR family protein+ko04075//Plant hormone signal transduction	GO:0050896//response to stimulus;GO:0042221//response to chemical;GO:0010033//response to organic substance;GO:0009719//response to endogenous stimulus;GO:0009733//response to auxin;GO:0009725//response to hormone;	XP_015087132.1|1.2e-75|PREDICTED: indole-3-acetic acid-induced protein ARG7-like [Solanum pennellii]
Solyc10g081390.1	3.72913	0.00068782
Solyc04g011750.3	3.70112	9.79528e-70			XP_004236724.1|1.5e-53|PREDICTED: histone H3.v1-like [Solanum lycopersicum]
Solyc04g055150.1	3.67666	0.000913014			XP_015073116.1|5.1e-65|PREDICTED: uncharacterized protein LOC107017388 [Solanum pennellii]
Solyc09g014720.2	3.66986	4.09778e-21	K04733//interleukin-1 receptor-associated kinase 4 [EC:2.7.11.1]	GO:0009987//cellular process;GO:0007166//cell surface receptor signaling pathway;GO:0050789//regulation of biological process;GO:0065007//biological regulation;GO:0007165//signal transduction;GO:0050794//regulation of cellular process;GO:0007154//cell communication;GO:0050896//response to stimulus;GO:0023052//signaling;GO:0051716//cellular response to stimulus;GO:0031224//intrinsic component of m…	XP_004246830.2|0.0e+00|PREDICTED: wall-associated receptor kinase 2-like [Solanum lycopersicum]
Solyc06g073165.1	3.63497	1.29278e-130	K06699//proteasome activator subunit 4+ko03050//Proteasome		XP_004241419.1|9.4e-240|PREDICTED: BURP domain-containing protein 16-like [Solanum lycopersicum]
Solyc01g105630.3	3.62222	4.3242e-06	K02183//calmodulin+ko04016//MAPK signaling pathway - plant+ko04626//Plant-pathogen interaction+ko04070//Phosphatidylinositol signaling system	GO:0043167//ion binding;GO:0005488//binding;GO:0005509//calcium ion binding;GO:0046872//metal ion binding;GO:0043169//cation binding;	XP_004230637.1|8.0e-77|PREDICTED: calmodulin [Solanum lycopersicum]
Solyc05g055320.3	3.62222	4.3242e-06	K00430//peroxidase [EC:1.11.1.7]+ko01100//Metabolic pathways+ko01110//Biosynthesis of secondary metabolites+ko00940//Phenylpropanoid biosynthesis	GO:0071554//cell wall organization or biogenesis;GO:0044237//cellular metabolic process;GO:0045229//external encapsulating structure organization;GO:0009664//plant-type cell wall organization;GO:0071840//cellular component organization or biogenesis;GO:0006950//response to stress;GO:0042744//hydrogen peroxide catabolic process;GO:0050896//response to stimulus;GO:0009056//catabolic process;GO:0072…	XP_004239722.1|1.8e-191|PREDICTED: peroxidase 5-like [Solanum lycopersicum]
Solyc07g052540.3	3.60828	4.97445e-06	K00430//peroxidase [EC:1.11.1.7]+ko01100//Metabolic pathways+ko01110//Biosynthesis of secondary metabolites+ko00940//Phenylpropanoid biosynthesis	GO:0006950//response to stress;GO:0042743//hydrogen peroxide metabolic process;GO:0045229//external encapsulating structure organization;GO:0071669//plant-type cell wall organization or biogenesis;GO:0071555//cell wall organization;GO:0044237//cellular metabolic process;GO:0044248//cellular catabolic process;GO:0072593//reactive oxygen species metabolic process;GO:0009056//catabolic process;GO:00…	XP_004243458.1|5.9e-186|PREDICTED: peroxidase 3-like [Solanum lycopersicum]
Solyc04g007050.3	3.57999	4.60448e-20	K13457//disease resistance protein RPM1+ko04626//Plant-pathogen interaction	GO:0006950//response to stress;GO:0006952//defense response;GO:0050896//response to stimulus;GO:0005488//binding;GO:0032559//adenyl ribonucleotide binding;GO:0097159//organic cyclic compound binding;GO:0032555//purine ribonucleotide binding;GO:1901363//heterocyclic compound binding;GO:0000166//nucleotide binding;GO:0043531//ADP binding;GO:0043168//anion binding;GO:1901265//nucleoside phosphate bi…	XP_010319429.1|0.0e+00|PREDICTED: putative late blight resistance protein homolog R1A-10 [Solanum lycopersicum]
Solyc02g068670.2	3.56563	1.67608e-10	K15503//serine/threonine-protein phosphatase 6 regulatory ankyrin repeat subunit B;K09420//transcriptional activator Myb	GO:0031224//intrinsic component of membrane;GO:0016021//integral component of membrane;GO:0016020//membrane;GO:0044425//membrane part;	XP_010317038.1|0.0e+00|PREDICTED: ankyrin repeat-containing protein At5g02620-like [Solanum lycopersicum]
Solyc07g039570.3	3.53649	2.94193e-10	K13422//transcription factor MYC2+ko04016//MAPK signaling pathway - plant+ko04075//Plant hormone signal transduction	GO:0005515//protein binding;GO:0005488//binding;GO:0046983//protein dimerization activity;	XP_010324053.1|1.0e-289|PREDICTED: putative transcription factor bHLH041 [Solanum lycopersicum]
Solyc01g102890.3	3.52949	1.85444e-09	K00384//thioredoxin reductase (NADPH) [EC:1.8.1.9]+ko00450//Selenocompound metabolism	GO:0005623//cell;GO:0005576//extracellular region;GO:0044464//cell part;GO:0005618//cell wall;GO:0071944//cell periphery;GO:0030312//external encapsulating structure;GO:0046872//metal ion binding;GO:0043167//ion binding;GO:0005488//binding;GO:0046914//transition metal ion binding;GO:0045735//nutrient reservoir activity;GO:0030145//manganese ion binding;GO:0043169//cation binding;	XP_004230403.1|1.9e-126|PREDICTED: putative germin-like protein 2-1 [Solanum lycopersicum]
Solyc11g040030.2	3.52921	0.000266	K00817//histidinol-phosphate aminotransferase [EC:2.6.1.9]+ko01230//Biosynthesis of amino acids+ko00960//Tropane, piperidine and pyridine alkaloid biosynthesis+ko00350//Tyrosine metabolism+ko01100//Metabolic pathways+ko00340//Histidine metabolism+ko01110//Biosynthesis of secondary metabolites+ko00400//Phenylalanine, tyrosine and tryptophan biosynthesis+ko00360//Phenylalanine metabolism	GO:0018130//heterocycle biosynthetic process;GO:0008152//metabolic process;GO:1901564//organonitrogen compound metabolic process;GO:0006807//nitrogen compound metabolic process;GO:0044281//small molecule metabolic process;GO:1901576//organic substance biosynthetic process;GO:0046483//heterocycle metabolic process;GO:0044249//cellular biosynthetic process;GO:0009058//biosynthetic process;GO:001975…	XP_020098060.1|2.8e-38|histidinol-phosphate aminotransferase, chloroplastic-like [Ananas comosus]
Solyc05g007630.3	3.44534	2.31673e-05	K14497//protein phosphatase 2C [EC:3.1.3.16]+ko04016//MAPK signaling pathway - plant+ko04075//Plant hormone signal transduction;K07198//5'-AMP-activated protein kinase, catalytic alpha subunit [EC:2.7.11.11];K13453//disease resistance protein+ko04626//Plant-pathogen interaction;K13457//disease resistance protein RPM1+ko04626//Plant-pathogen interaction	GO:0009987//cellular process;GO:0006952//defense response;GO:0050794//regulation of cellular process;GO:0023052//signaling;GO:0050789//regulation of biological process;GO:0051716//cellular response to stimulus;GO:0065007//biological regulation;GO:0007154//cell communication;GO:0006950//response to stress;GO:0050896//response to stimulus;GO:0007165//signal transduction;GO:0005623//cell;GO:0016020/…	XP_004239389.1|0.0e+00|PREDICTED: putative late blight resistance protein homolog R1B-23 isoform X1 [Solanum lycopersicum]
Solyc08g079920.2	3.44513	2.11441e-13	K15333//tRNA guanosine-2'-O-methyltransferase [EC:2.1.1.34];K12619//5'-3' exoribonuclease 2 [EC:3.1.13.-]+ko03018//RNA degradation+ko03008//Ribosome biogenesis in eukaryotes;K13199//plasminogen activator inhibitor 1 RNA-binding protein;K14568//rRNA small subunit pseudouridine methyltransferase Nep1 [EC:2.1.1.260]+ko03008//Ribosome biogenesis in eukaryotes;K13124//mitogen-activated protein kinase …	GO:0017171//serine hydrolase activity;GO:0004252//serine-type endopeptidase activity;GO:0070011//peptidase activity, acting on L-amino acid peptides;GO:0140096//catalytic activity, acting on a protein;GO:0008236//serine-type peptidase activity;GO:0004175//endopeptidase activity;GO:0003824//catalytic activity;GO:0016787//hydrolase activity;GO:0008233//peptidase activity;	NP_001308000.1|0.0e+00|subtilisin-like protease precursor [Solanum lycopersicum]
Solyc11g010400.2	3.44444	0.000413011	K18054//2'-deoxymugineic-acid 2'-dioxygenase / mugineic-acid 3-dioxygenase [EC:1.14.11.24 1.14.11.25]	GO:0005488//binding;GO:0003824//catalytic activity;GO:0051213//dioxygenase activity;GO:0016491//oxidoreductase activity;GO:0043169//cation binding;GO:0046872//metal ion binding;GO:0043167//ion binding;	XP_004250129.1|5.1e-188|PREDICTED: hyoscyamine 6-dioxygenase [Solanum lycopersicum]
Solyc01g108860.3	3.43079	6.04229e-28	K05282//gibberellin-44 dioxygenase [EC:1.14.11.12]+ko00904//Diterpenoid biosynthesis+ko01100//Metabolic pathways+ko01110//Biosynthesis of secondary metabolites;K06892//feruloyl-CoA ortho-hydroxylase [EC:1.14.11.-]+ko01110//Biosynthesis of secondary metabolites+ko00940//Phenylpropanoid biosynthesis;K05278//flavonol synthase [EC:1.14.20.6]+ko01100//Metabolic pathways+ko01110//Biosynthesis of second…	GO:0016491//oxidoreductase activity;GO:0003824//catalytic activity;GO:0043169//cation binding;GO:0043167//ion binding;GO:0046872//metal ion binding;GO:0005488//binding;	XP_004230828.1|1.6e-207|PREDICTED: protein DMR6-LIKE OXYGENASE 2 [Solanum lycopersicum]
Solyc08g006645.1	3.38914	0.000833835
Solyc00g026160.3	3.38121	4.05783e-05	K00521//ferric-chelate reductase [EC:1.16.1.7]	GO:0044425//membrane part;GO:0016021//integral component of membrane;GO:0016020//membrane;GO:0031224//intrinsic component of membrane;GO:0016491//oxidoreductase activity;GO:0003824//catalytic activity;	XP_004253331.2|2.5e-270|PREDICTED: ferric reduction oxidase 4 [Solanum lycopersicum]
Solyc03g007580.2	3.38121	4.05783e-05	K16302//metal transporter CNNM	GO:0044425//membrane part;GO:0016021//integral component of membrane;GO:0031224//intrinsic component of membrane;GO:0016020//membrane;	XP_004234192.1|4.5e-186|PREDICTED: DUF21 domain-containing protein At5g52790 [Solanum lycopersicum]
Solyc01g102910.3	3.36656	1.21545e-07	K00384//thioredoxin reductase (NADPH) [EC:1.8.1.9]+ko00450//Selenocompound metabolism	GO:0071944//cell periphery;GO:0030312//external encapsulating structure;GO:0005618//cell wall;GO:0005623//cell;GO:0044464//cell part;GO:0005576//extracellular region;GO:0005488//binding;GO:0043167//ion binding;GO:0030145//manganese ion binding;GO:0045735//nutrient reservoir activity;GO:0043169//cation binding;GO:0046872//metal ion binding;GO:0046914//transition metal ion binding;	XP_004230405.1|2.8e-128|PREDICTED: germin-like protein subfamily 1 member 14 [Solanum lycopersicum]
Solyc01g099500.1	3.3486	6.34752e-07	K10900//werner syndrome ATP-dependent helicase [EC:3.6.4.12]		XP_010312973.1|2.1e-40|PREDICTED: ATP-dependent DNA helicase Q-like SIM isoform X9 [Solanum lycopersicum]
Solyc10g047170.2	3.31409	7.05427e-05	K17470//sulfate transporter 1, high-affinity	GO:0031224//intrinsic component of membrane;GO:0016020//membrane;GO:0016021//integral component of membrane;GO:0044425//membrane part;GO:0005886//plasma membrane;GO:0005623//cell;GO:0071944//cell periphery;GO:0044464//cell part;GO:0015318//inorganic molecular entity transmembrane transporter activity;GO:0005215//transporter activity;GO:0015103//inorganic anion transmembrane transporter activity;G…	NP_001275426.1|0.0e+00|high affinity sulfate transporter type 1 [Solanum tuberosum]
Solyc03g113580.1	3.25965	6.10441e-17		GO:0030312//external encapsulating structure;GO:0044464//cell part;GO:0005623//cell;GO:0005576//extracellular region;GO:0071944//cell periphery;GO:0005618//cell wall;GO:0030145//manganese ion binding;GO:0046872//metal ion binding;GO:0043167//ion binding;GO:0045735//nutrient reservoir activity;GO:0046914//transition metal ion binding;GO:0005488//binding;GO:0043169//cation binding;	XP_004236167.1|4.7e-121|PREDICTED: germin-like protein subfamily T member 2 [Solanum lycopersicum]
Solyc04g012050.3	3.25777	2.29636e-93	K09286//EREBP-like factor;K12900//FUS-interacting serine-arginine-rich protein 1+ko03040//Spliceosome	GO:0044271//cellular nitrogen compound biosynthetic process;GO:0009987//cellular process;GO:0009058//biosynthetic process;GO:0044260//cellular macromolecule metabolic process;GO:0016070//RNA metabolic process;GO:0009059//macromolecule biosynthetic process;GO:0008152//metabolic process;GO:1901576//organic substance biosynthetic process;GO:0032774//RNA biosynthetic process;GO:0044238//primary metab…	XP_004237144.1|5.1e-229|PREDICTED: ethylene-responsive transcription factor ABR1-like [Solanum lycopersicum]
Solyc03g096540.3	3.25128	3.29286e-34			XP_004235260.1|5.0e-104|PREDICTED: PLAT domain-containing protein 3-like [Solanum lycopersicum]
Solyc12g006760.1	3.25018	0.000116227			OIT01608.1|1.1e-23|hypothetical protein A4A49_04990 [Nicotiana attenuata]
Solyc02g071070.3	3.24371	2.32638e-06		GO:0051179//localization;GO:0098771//inorganic ion homeostasis;GO:0042592//homeostatic process;GO:0006885//regulation of pH;GO:0006812//cation transport;GO:0050801//ion homeostasis;GO:0055080//cation homeostasis;GO:0065008//regulation of biological quality;GO:0051234//establishment of localization;GO:0006811//ion transport;GO:0006810//transport;GO:0055067//monovalent inorganic cation homeostasis;…	XP_004233089.1|0.0e+00|PREDICTED: cation/H(+) antiporter 18-like [Solanum lycopersicum]
Solyc04g071770.3	3.23731	1.15379e-195	K12900//FUS-interacting serine-arginine-rich protein 1+ko03040//Spliceosome;K09286//EREBP-like factor	GO:0009987//cellular process;GO:0010467//gene expression;GO:0006139//nucleobase-containing compound metabolic process;GO:1901360//organic cyclic compound metabolic process;GO:0071704//organic substance metabolic process;GO:0009059//macromolecule biosynthetic process;GO:1901362//organic cyclic compound biosynthetic process;GO:0016070//RNA metabolic process;GO:0046483//heterocycle metabolic process…	XP_004237817.1|1.8e-261|PREDICTED: ethylene-responsive transcription factor ABR1-like [Solanum lycopersicum]
Solyc01g108220.3	3.20322	1.63581e-25	K09843//(+)-abscisic acid 8'-hydroxylase [EC:1.14.14.137]+ko00906//Carotenoid biosynthesis	GO:0010817//regulation of hormone levels;GO:0016132//brassinosteroid biosynthetic process;GO:0065008//regulation of biological quality;GO:0048878//chemical homeostasis;GO:0016125//sterol metabolic process;GO:0071704//organic substance metabolic process;GO:0042445//hormone metabolic process;GO:1901576//organic substance biosynthetic process;GO:1901617//organic hydroxy compound biosynthetic process…	XP_019067426.1|2.3e-29|PREDICTED: abscisic acid 8'-hydroxylase 4 isoform X3 [Solanum lycopersicum]
Solyc03g006930.2	3.1697	0.000211483	K14497//protein phosphatase 2C [EC:3.1.3.16]+ko04016//MAPK signaling pathway - plant+ko04075//Plant hormone signal transduction		XP_010317458.2|9.7e-197|PREDICTED: probable protein phosphatase 2C 75 isoform X1 [Solanum lycopersicum]
Solyc10g076550.1	3.1481	5.61495e-131	K04733//interleukin-1 receptor-associated kinase 4 [EC:2.7.11.1]	GO:0016020//membrane;GO:0031224//intrinsic component of membrane;GO:0044425//membrane part;GO:0016021//integral component of membrane;GO:0097159//organic cyclic compound binding;GO:0030247//polysaccharide binding;GO:1901363//heterocyclic compound binding;GO:0036094//small molecule binding;GO:0035639//purine ribonucleoside triphosphate binding;GO:0140096//catalytic activity, acting on a protein;GO…	XP_019071529.1|3.8e-233|PREDICTED: LOW QUALITY PROTEIN: wall-associated receptor kinase 2-like [Solanum lycopersicum]
Solyc02g087070.3	3.13342	7.04352e-06	K10529//alpha-dioxygenase [EC:1.-.-.-]+ko00592//alpha-Linolenic acid metabolism	GO:0006979//response to oxidative stress;GO:0006950//response to stress;GO:0050896//response to stimulus;GO:1901363//heterocyclic compound binding;GO:0048037//cofactor binding;GO:0097159//organic cyclic compound binding;GO:0016209//antioxidant activity;GO:0051213//dioxygenase activity;GO:0046906//tetrapyrrole binding;GO:0016684//oxidoreductase activity, acting on peroxide as acceptor;GO:0004601//…	NP_001234410.2|0.0e+00|alpha-DOX1 [Solanum lycopersicum]
Solyc07g008600.1	3.13001	2.40484e-150	K13466//EIX receptor 1/2+ko04626//Plant-pathogen interaction;K19613//leucine-rich repeat protein SHOC2	GO:0044425//membrane part;GO:0016021//integral component of membrane;GO:0016020//membrane;GO:0031224//intrinsic component of membrane;	XP_004242808.2|0.0e+00|PREDICTED: probable leucine-rich repeat receptor-like protein kinase At2g33170 [Solanum lycopersicum]
Solyc09g005000.1	3.12136	7.13956e-76	K04733//interleukin-1 receptor-associated kinase 4 [EC:2.7.11.1]	GO:0031224//intrinsic component of membrane;GO:0016020//membrane;GO:0044425//membrane part;GO:0016021//integral component of membrane;GO:0008144//drug binding;GO:0030246//carbohydrate binding;GO:0016301//kinase activity;GO:0017076//purine nucleotide binding;GO:0005524//ATP binding;GO:1901265//nucleoside phosphate binding;GO:0035639//purine ribonucleoside triphosphate binding;GO:0016773//phosphotr…	NP_001307848.1|0.0e+00|lectin-domain containing receptor kinase VI.3-like precursor [Solanum lycopersicum]
Solyc09g011270.3	3.1116	2.64608e-13	K03283//heat shock 70kDa protein 1/2/6/8+ko03040//Spliceosome+ko04144//Endocytosis+ko04141//Protein processing in endoplasmic reticulum;K17609//nucleoredoxin [EC:1.8.1.8]		XP_019071040.1|1.7e-112|PREDICTED: uncharacterized protein LOC101250920 [Solanum lycopersicum]
Solyc05g052650.2	3.11085	0.000577933	K22889//trichothecene 3-O-acetyltransferase [EC:2.3.1.-]	GO:0016746//transferase activity, transferring acyl groups;GO:0003824//catalytic activity;GO:0016740//transferase activity;GO:0016747//transferase activity, transferring acyl groups other than amino-acyl groups;	XP_004239937.1|7.7e-58|PREDICTED: BAHD acyltransferase DCR-like [Solanum lycopersicum]
Solyc01g109900.3	3.0917	5.14643e-19			XP_010315317.1|2.1e-39|PREDICTED: uncharacterized protein LOC101246971 isoform X2 [Solanum lycopersicum]
Solyc05g012180.3	3.0917	1.28901e-08	K13544//pheophorbidase [EC:3.1.1.82]+ko00860//Porphyrin and chlorophyll metabolism+ko01110//Biosynthesis of secondary metabolites	GO:0003824//catalytic activity;GO:0016787//hydrolase activity;	XP_004239042.1|9.0e-242|PREDICTED: putative methylesterase 11, chloroplastic [Solanum lycopersicum]
Solyc10g049280.2	3.0917	3.93116e-07	K14611//solute carrier family 23 (nucleobase transporter), member 1/2	GO:0051234//establishment of localization;GO:0006810//transport;GO:0051179//localization;GO:0055085//transmembrane transport;GO:0044425//membrane part;GO:0016020//membrane;GO:0031224//intrinsic component of membrane;GO:0016021//integral component of membrane;GO:0005215//transporter activity;	XP_016506773.1|1.5e-254|PREDICTED: nucleobase-ascorbate transporter 4-like isoform X1 [Nicotiana tabacum]
Solyc03g097560.3	3.08689	0.000376773	K15382//solute carrier family 50 (sugar transporter)	GO:0008643//carbohydrate transport;GO:0006810//transport;GO:0051234//establishment of localization;GO:0071702//organic substance transport;GO:0051179//localization;GO:0071944//cell periphery;GO:0031224//intrinsic component of membrane;GO:0044464//cell part;GO:0016020//membrane;GO:0016021//integral component of membrane;GO:0044425//membrane part;GO:0005886//plasma membrane;GO:0005623//cell;GO:0051…	XP_004235340.1|4.1e-163|PREDICTED: bidirectional sugar transporter SWEET14 [Solanum lycopersicum]
Solyc04g074000.3	3.08261	0	K17422//large subunit ribosomal protein L41;K00924//kinase [EC:2.7.1.-];K13420//LRR receptor-like serine/threonine-protein kinase FLS2 [EC:2.7.11.1]+ko04016//MAPK signaling pathway - plant+ko04626//Plant-pathogen interaction	GO:0044425//membrane part;GO:0031224//intrinsic component of membrane;GO:0016020//membrane;GO:0016021//integral component of membrane;GO:0017076//purine nucleotide binding;GO:0043168//anion binding;GO:0035639//purine ribonucleoside triphosphate binding;GO:0008144//drug binding;GO:0016772//transferase activity, transferring phosphorus-containing groups;GO:0016773//phosphotransferase activity, alco…	XP_010320167.1|0.0e+00|PREDICTED: MDIS1-interacting receptor like kinase 2-like [Solanum lycopersicum]
Solyc12g006110.2	3.05106	1.34338e-12	K19519//transforming growth factor-beta-induced protein	GO:0044425//membrane part;GO:0031224//intrinsic component of membrane;GO:0016021//integral component of membrane;GO:0016020//membrane;	XP_004251538.1|3.4e-193|PREDICTED: fasciclin-like arabinogalactan protein 2 [Solanum lycopersicum]
Solyc01g100440.2	3.0322	1.38318e-16			XP_010313497.1|2.4e-305|PREDICTED: uncharacterized protein LOC104644784 isoform X1 [Solanum lycopersicum]
Solyc12g097080.2	3.02131	7.04894e-11	K00799//glutathione S-transferase [EC:2.5.1.18]+ko00480//Glutathione metabolism	GO:0006749//glutathione metabolic process;GO:0071704//organic substance metabolic process;GO:0009987//cellular process;GO:0044248//cellular catabolic process;GO:0042221//response to chemical;GO:0006790//sulfur compound metabolic process;GO:0009407//toxin catabolic process;GO:0009636//response to toxic substance;GO:0043603//cellular amide metabolic process;GO:0006518//peptide metabolic process;GO:…	XP_004253010.1|5.6e-126|PREDICTED: probable glutathione S-transferase [Solanum lycopersicum]
Solyc02g081510.2	3.01985	2.11241e-14	K04733//interleukin-1 receptor-associated kinase 4 [EC:2.7.11.1]		XP_019067609.1|4.4e-139|PREDICTED: rust resistance kinase Lr10-like [Solanum lycopersicum]
Solyc04g078880.3	3.01499	1.20217e-05		GO:0044425//membrane part;GO:0031224//intrinsic component of membrane;GO:0016021//integral component of membrane;GO:0016020//membrane;	XP_004238154.1|2.3e-126|PREDICTED: uncharacterized protein LOC101253889 [Solanum lycopersicum]
Solyc00g020545.1	3.00924	0.000627499	K00521//ferric-chelate reductase [EC:1.16.1.7]	GO:0031224//intrinsic component of membrane;GO:0016020//membrane;GO:0016021//integral component of membrane;GO:0044425//membrane part;GO:0003824//catalytic activity;GO:0016491//oxidoreductase activity;	XP_004253309.1|5.7e-124|PREDICTED: ferric reduction oxidase 4-like, partial [Solanum lycopersicum]
Solyc04g009640.3	2.96563	1.45862e-107	K13420//LRR receptor-like serine/threonine-protein kinase FLS2 [EC:2.7.11.1]+ko04016//MAPK signaling pathway - plant+ko04626//Plant-pathogen interaction	GO:0031224//intrinsic component of membrane;GO:0044425//membrane part;GO:0016020//membrane;GO:0016021//integral component of membrane;GO:1901363//heterocyclic compound binding;GO:0036094//small molecule binding;GO:0005488//binding;GO:0140096//catalytic activity, acting on a protein;GO:0003824//catalytic activity;GO:0004674//protein serine/threonine kinase activity;GO:0097367//carbohydrate derivat…	XP_004237164.2|0.0e+00|PREDICTED: receptor kinase-like protein Xa21 [Solanum lycopersicum]
Solyc12g098400.2	2.95315	3.73112e-23	K02941//large subunit ribosomal protein LP0+ko03010//Ribosome;K22733//magnesium transporter	GO:0044425//membrane part;GO:0016021//integral component of membrane;GO:0016020//membrane;GO:0031224//intrinsic component of membrane;	XP_006349925.1|4.9e-266|PREDICTED: uncharacterized protein At1g04910-like [Solanum tuberosum]
Solyc03g096430.1	2.94722	5.08218e-23			OIT38151.1|2.8e-08|hypothetical protein A4A49_02974 [Nicotiana attenuata]
Solyc02g090470.3	2.92497	5.70546e-09	K00430//peroxidase [EC:1.11.1.7]+ko01100//Metabolic pathways+ko01110//Biosynthesis of secondary metabolites+ko00940//Phenylpropanoid biosynthesis	GO:0072593//reactive oxygen species metabolic process;GO:0051186//cofactor metabolic process;GO:0017144//drug metabolic process;GO:0050896//response to stimulus;GO:0044248//cellular catabolic process;GO:0042737//drug catabolic process;GO:0044237//cellular metabolic process;GO:0006950//response to stress;GO:0042744//hydrogen peroxide catabolic process;GO:0008152//metabolic process;GO:0009056//cata…	XP_004232052.1|7.9e-176|PREDICTED: peroxidase 10 [Solanum lycopersicum]
Solyc10g076540.1	2.89578	9.06375e-27	K04733//interleukin-1 receptor-associated kinase 4 [EC:2.7.11.1]	GO:0016021//integral component of membrane;GO:0044425//membrane part;GO:0016020//membrane;GO:0031224//intrinsic component of membrane;GO:0004672//protein kinase activity;GO:0000166//nucleotide binding;GO:0016772//transferase activity, transferring phosphorus-containing groups;GO:1901265//nucleoside phosphate binding;GO:0035639//purine ribonucleoside triphosphate binding;GO:0030247//polysaccharide…	XP_019071529.1|8.1e-39|PREDICTED: LOW QUALITY PROTEIN: wall-associated receptor kinase 2-like [Solanum lycopersicum]
Solyc06g074420.1	2.87694	0	K20624//12-hydroxyjasmonoyl-L-amino acid 12-hydroxylase / fatty acid hydroxylase [EC:1.14.14.49]	GO:0046872//metal ion binding;GO:1901363//heterocyclic compound binding;GO:0016705//oxidoreductase activity, acting on paired donors, with incorporation or reduction of molecular oxygen;GO:0043167//ion binding;GO:0097159//organic cyclic compound binding;GO:0016491//oxidoreductase activity;GO:0048037//cofactor binding;GO:0005488//binding;GO:0005506//iron ion binding;GO:0046906//tetrapyrrole bindin…	XP_010322431.2|9.0e-282|PREDICTED: cytochrome P450 94C1 [Solanum lycopersicum]
Solyc08g007840.2	2.84913	2.61132e-66	K09286//EREBP-like factor	GO:0044237//cellular metabolic process;GO:0044238//primary metabolic process;GO:0006139//nucleobase-containing compound metabolic process;GO:0071704//organic substance metabolic process;GO:0006725//cellular aromatic compound metabolic process;GO:0006807//nitrogen compound metabolic process;GO:0018130//heterocycle biosynthetic process;GO:0006351//transcription, DNA-templated;GO:0034645//cellular m…	XP_004244718.1|1.2e-113|PREDICTED: ethylene-responsive transcription factor ERF027-like [Solanum lycopersicum]
Solyc11g011360.2	2.84292	1.78702e-55	K07766//diphosphoinositol-polyphosphate diphosphatase [EC:3.6.1.52]	GO:0044464//cell part;GO:0043227//membrane-bounded organelle;GO:0043231//intracellular membrane-bounded organelle;GO:0005737//cytoplasm;GO:0005623//cell;GO:0043226//organelle;GO:0044424//intracellular part;GO:0005634//nucleus;GO:0005622//intracellular;GO:0043229//intracellular organelle;GO:0016817//hydrolase activity, acting on acid anhydrides;GO:0016787//hydrolase activity;GO:0003824//catalytic …	XP_004250193.1|8.5e-114|PREDICTED: nudix hydrolase 18, mitochondrial-like [Solanum lycopersicum]
Solyc07g026650.3	2.84234	2.98734e-09	K05933//aminocyclopropanecarboxylate oxidase [EC:1.14.17.4]+ko01100//Metabolic pathways+ko01110//Biosynthesis of secondary metabolites+ko00270//Cysteine and methionine metabolism	GO:0031669//cellular response to nutrient levels;GO:0009605//response to external stimulus;GO:0010033//response to organic substance;GO:0071241//cellular response to inorganic substance;GO:0042221//response to chemical;GO:1902170//cellular response to reactive nitrogen species;GO:0010038//response to metal ion;GO:0006950//response to stress;GO:0050896//response to stimulus;GO:0006979//response to…	NP_001234037.1|1.4e-175|1-aminocyclopropane-1-carboxylate oxidase [Solanum lycopersicum]
Solyc04g080540.2	2.83932	1.03378e-73			XP_004238295.1|3.4e-76|PREDICTED: uncharacterized protein LOC101245159 [Solanum lycopersicum]
Solyc01g089890.3	2.83372	7.10013e-23	K20359//PRA1 family protein 1	GO:0006810//transport;GO:0051179//localization;GO:0051234//establishment of localization;GO:0016021//integral component of membrane;GO:0044425//membrane part;GO:0016020//membrane;GO:0031224//intrinsic component of membrane;	XP_015085535.1|7.2e-97|PREDICTED: uncharacterized protein LOC107028834 [Solanum pennellii]
Solyc08g044510.3	2.82867	9.9294e-06	K22279//vicianin beta-glucosidase [EC:3.2.1.119]	GO:1901135//carbohydrate derivative metabolic process;GO:0044238//primary metabolic process;GO:0005975//carbohydrate metabolic process;GO:0071704//organic substance metabolic process;GO:1901657//glycosyl compound metabolic process;GO:0008152//metabolic process;GO:0044425//membrane part;GO:0031224//intrinsic component of membrane;GO:0016020//membrane;GO:0016021//integral component of membrane;GO:0…	XP_004244958.1|2.6e-305|PREDICTED: beta-glucosidase 13-like isoform X1 [Solanum lycopersicum]
Solyc03g117860.3	2.81549	4.68649e-100	K11975//E3 ubiquitin-protein ligase RNF144 [EC:2.3.2.31]	GO:1901564//organonitrogen compound metabolic process;GO:1901800//positive regulation of proteasomal protein catabolic process;GO:1901575//organic substance catabolic process;GO:0032270//positive regulation of cellular protein metabolic process;GO:1901565//organonitrogen compound catabolic process;GO:0044257//cellular protein catabolic process;GO:0043170//macromolecule metabolic process;GO:190305…	XP_004235872.1|5.0e-100|PREDICTED: probable E3 ubiquitin-protein ligase RNF217 [Solanum lycopersicum]
Solyc03g111280.1	2.80001	2.24946e-20	K20665//jasmonoyl-L-amino acid 12-hydroxylase [EC:1.14.14.48]	GO:0046906//tetrapyrrole binding;GO:0016491//oxidoreductase activity;GO:0004497//monooxygenase activity;GO:0097159//organic cyclic compound binding;GO:0020037//heme binding;GO:0005506//iron ion binding;GO:0016705//oxidoreductase activity, acting on paired donors, with incorporation or reduction of molecular oxygen;GO:0048037//cofactor binding;GO:0043167//ion binding;GO:0005488//binding;GO:0003824…	XP_004236553.1|4.1e-290|PREDICTED: cytochrome P450 94B3-like [Solanum lycopersicum]
Solyc10g085860.1	2.79625	9.00971e-08	K13496//UDP-glucosyl transferase 73C [EC:2.4.1.-];K22771//flavonol-3-O-L-rhamnoside-7-O-glucosyltransferase [EC:2.4.1.-]+ko00944//Flavone and flavonol biosynthesis	GO:0008152//metabolic process;GO:0043229//intracellular organelle;GO:0044464//cell part;GO:0043227//membrane-bounded organelle;GO:0044424//intracellular part;GO:0043231//intracellular membrane-bounded organelle;GO:0043226//organelle;GO:0005622//intracellular;GO:0005623//cell;GO:0080043//quercetin 3-O-glucosyltransferase activity;GO:0016757//transferase activity, transferring glycosyl groups;GO:00…	XP_004249831.1|4.1e-290|PREDICTED: UDP-glycosyltransferase 73D1 [Solanum lycopersicum]
Solyc07g042510.3	2.79326	2.12403e-49	K06890//uncharacterized protein	GO:0031224//intrinsic component of membrane;GO:0044425//membrane part;GO:0016020//membrane;GO:0016021//integral component of membrane;	XP_004243681.1|6.2e-133|PREDICTED: BI1-like protein isoform X2 [Solanum lycopersicum]
Solyc10g084960.2	2.79214	1.15867e-18	K00799//glutathione S-transferase [EC:2.5.1.18]+ko00480//Glutathione metabolism	GO:0008152//metabolic process;GO:0009056//catabolic process;GO:0019748//secondary metabolic process;GO:0006749//glutathione metabolic process;GO:0009636//response to toxic substance;GO:0071704//organic substance metabolic process;GO:0042221//response to chemical;GO:0006807//nitrogen compound metabolic process;GO:0090487//secondary metabolite catabolic process;GO:0006790//sulfur compound metabolic…	XP_004249548.1|2.0e-124|PREDICTED: probable glutathione S-transferase [Solanum lycopersicum]
Solyc10g076240.2	2.78151	9.39758e-54	K00430//peroxidase [EC:1.11.1.7]+ko01100//Metabolic pathways+ko01110//Biosynthesis of secondary metabolites+ko00940//Phenylpropanoid biosynthesis		OVA12662.1|5.1e-197|Plant peroxidase [Macleaya cordata]
Solyc02g079180.1	2.77976	1.68134e-05	K09419//heat shock transcription factor, other eukaryote	GO:0005622//intracellular;GO:0043229//intracellular organelle;GO:0005623//cell;GO:0043226//organelle;GO:0043231//intracellular membrane-bounded organelle;GO:0044424//intracellular part;GO:0044464//cell part;GO:0005634//nucleus;GO:0043227//membrane-bounded organelle;GO:0005488//binding;GO:0003676//nucleic acid binding;GO:0140110//transcription regulator activity;GO:0003700//DNA-binding transcripti…	XP_010316675.1|8.1e-239|PREDICTED: heat stress transcription factor A-1b-like isoform X1 [Solanum lycopersicum]
Solyc04g015220.3	2.76308	1.52259e-07	K13457//disease resistance protein RPM1+ko04626//Plant-pathogen interaction;K13453//disease resistance protein+ko04626//Plant-pathogen interaction	GO:0050896//response to stimulus;GO:0006950//response to stress;GO:0006952//defense response;GO:0000166//nucleotide binding;GO:0043167//ion binding;GO:0030554//adenyl nucleotide binding;GO:1901363//heterocyclic compound binding;GO:0043168//anion binding;GO:0036094//small molecule binding;GO:0097159//organic cyclic compound binding;GO:0043531//ADP binding;GO:0097367//carbohydrate derivative bindin…	XP_010319214.1|0.0e+00|PREDICTED: putative late blight resistance protein homolog R1B-16 [Solanum lycopersicum]
Solyc11g007420.1	2.74751	7.92619e-19	K04733//interleukin-1 receptor-associated kinase 4 [EC:2.7.11.1]		XP_004249994.2|2.6e-66|PREDICTED: rust resistance kinase Lr10-like [Solanum lycopersicum]
Solyc03g096550.3	2.74531	9.97609e-41			XP_015068389.1|1.1e-90|PREDICTED: lipoxygenase homology domain-containing protein 1-like [Solanum pennellii]
Solyc08g068870.3	2.74432	0	K01381//saccharopepsin [EC:3.4.23.25]	GO:0030163//protein catabolic process;GO:0006508//proteolysis;GO:0009057//macromolecule catabolic process;GO:1901564//organonitrogen compound metabolic process;GO:0044238//primary metabolic process;GO:0043170//macromolecule metabolic process;GO:0019538//protein metabolic process;GO:1901565//organonitrogen compound catabolic process;GO:0006807//nitrogen compound metabolic process;GO:0008152//metab…	NP_001316135.1|3.6e-262|aspartate protease family protein precursor [Solanum lycopersicum]
Solyc12g096570.1	2.73309	1.27035e-54		GO:0016021//integral component of membrane;GO:0031224//intrinsic component of membrane;GO:0016020//membrane;GO:0044425//membrane part;	NP_001234679.2|3.3e-60|ARGOS [Solanum lycopersicum]
Solyc02g077590.1	2.73002	1.94617e-240	K22756//E3 SUMO-protein ligase NSE2 [EC:2.3.2.-];K09338//homeobox-leucine zipper protein	GO:0060255//regulation of macromolecule metabolic process;GO:0010468//regulation of gene expression;GO:0050794//regulation of cellular process;GO:0031326//regulation of cellular biosynthetic process;GO:0050789//regulation of biological process;GO:0006355//regulation of transcription, DNA-templated;GO:0019222//regulation of metabolic process;GO:0051252//regulation of RNA metabolic process;GO:00313…	XP_015065114.1|6.7e-97|PREDICTED: homeobox-leucine zipper protein ATHB-52-like [Solanum pennellii]
Solyc06g010030.3	2.72913	1.96002e-13	K08472//mlo protein	GO:0009607//response to biotic stimulus;GO:0006950//response to stress;GO:0006952//defense response;GO:0050896//response to stimulus;GO:0044425//membrane part;GO:0071944//cell periphery;GO:0005623//cell;GO:0005886//plasma membrane;GO:0016021//integral component of membrane;GO:0044464//cell part;GO:0031224//intrinsic component of membrane;GO:0016020//membrane;GO:0005516//calmodulin binding;GO:0005…	AOL57962.1|1.3e-75|MLO3 [Solanum lycopersicum]
Solyc09g090210.3	2.72913	2.8366e-05	K04733//interleukin-1 receptor-associated kinase 4 [EC:2.7.11.1]	GO:0051716//cellular response to stimulus;GO:0071704//organic substance metabolic process;GO:0050794//regulation of cellular process;GO:0016310//phosphorylation;GO:0006793//phosphorus metabolic process;GO:0044238//primary metabolic process;GO:0036211//protein modification process;GO:0006468//protein phosphorylation;GO:0044260//cellular macromolecule metabolic process;GO:0006807//nitrogen compound…	XP_004247739.1|5.5e-202|PREDICTED: probable protein kinase At2g41970 [Solanum lycopersicum]
Solyc01g095140.3	2.7163	0		GO:0009269//response to desiccation;GO:0042221//response to chemical;GO:0050896//response to stimulus;GO:0010035//response to inorganic substance;GO:0001101//response to acid chemical;GO:1901700//response to oxygen-containing compound;GO:0009414//response to water deprivation;GO:0009415//response to water;GO:0006950//response to stress;GO:0009628//response to abiotic stimulus;	NP_001233938.1|2.0e-86|ethylene-responsive late embryogenesis-like protein [Solanum lycopersicum]
Solyc06g072460.1	2.71448	1.33166e-36	K17609//nucleoredoxin [EC:1.8.1.8];K03283//heat shock 70kDa protein 1/2/6/8+ko03040//Spliceosome+ko04144//Endocytosis+ko04141//Protein processing in endoplasmic reticulum		XP_004241463.2|1.7e-224|PREDICTED: uncharacterized protein LOC101268692 [Solanum lycopersicum]
Solyc10g076210.2	2.70015	1.16221e-06	K00430//peroxidase [EC:1.11.1.7]+ko01100//Metabolic pathways+ko01110//Biosynthesis of secondary metabolites+ko00940//Phenylpropanoid biosynthesis	GO:0008152//metabolic process;GO:0051187//cofactor catabolic process;GO:0042744//hydrogen peroxide catabolic process;GO:0051186//cofactor metabolic process;GO:0017144//drug metabolic process;GO:0044237//cellular metabolic process;GO:0006950//response to stress;GO:0042743//hydrogen peroxide metabolic process;GO:0009056//catabolic process;GO:0050896//response to stimulus;GO:0044248//cellular catabo…	XP_004249054.1|6.9e-180|PREDICTED: peroxidase 70-like [Solanum lycopersicum]
Solyc02g084800.3	2.68343	3.90427e-12	K00430//peroxidase [EC:1.11.1.7]+ko01100//Metabolic pathways+ko01110//Biosynthesis of secondary metabolites+ko00940//Phenylpropanoid biosynthesis	GO:0017144//drug metabolic process;GO:0042737//drug catabolic process;GO:0042743//hydrogen peroxide metabolic process;GO:0009987//cellular process;GO:0072593//reactive oxygen species metabolic process;GO:0051187//cofactor catabolic process;GO:0042744//hydrogen peroxide catabolic process;GO:0051186//cofactor metabolic process;GO:0006950//response to stress;GO:0008152//metabolic process;GO:0044248/…	OTF93243.1|2.1e-255|putative heme peroxidase [Helianthus annuus]
Solyc04g074020.2	2.66254	1.64537e-122	K20718//LRR receptor-like serine/threonine-protein kinase ERECTA [EC:2.7.11.1]+ko04016//MAPK signaling pathway - plant	GO:0016020//membrane;GO:0016021//integral component of membrane;GO:0044425//membrane part;GO:0031224//intrinsic component of membrane;GO:0016772//transferase activity, transferring phosphorus-containing groups;GO:0008144//drug binding;GO:0032555//purine ribonucleotide binding;GO:1901265//nucleoside phosphate binding;GO:0016773//phosphotransferase activity, alcohol group as acceptor;GO:0005488//bi…	XP_010320166.2|0.0e+00|PREDICTED: LOW QUALITY PROTEIN: MDIS1-interacting receptor like kinase 2-like [Solanum lycopersicum]
Solyc12g036150.1	2.64944	0.000352713	K05665//ATP-binding cassette, subfamily C (CFTR/MRP), member 1 [EC:7.6.2.3]+ko02010//ABC transporters;K05666//ATP-binding cassette, subfamily C (CFTR/MRP), member 2+ko02010//ABC transporters		XP_010314183.1|3.3e-138|PREDICTED: ABC transporter C family member 12-like isoform X5 [Solanum lycopersicum]
Solyc10g086690.2	2.64022	2.74817e-92	K22697//sphingomyelin synthase-related protein 1;K04714//shingomyelin synthase [EC:2.7.8.27]+ko00600//Sphingolipid metabolism+ko01100//Metabolic pathways	GO:0030148//sphingolipid biosynthetic process;GO:1901564//organonitrogen compound metabolic process;GO:0044255//cellular lipid metabolic process;GO:1901576//organic substance biosynthetic process;GO:0008152//metabolic process;GO:0071704//organic substance metabolic process;GO:1901566//organonitrogen compound biosynthetic process;GO:0006807//nitrogen compound metabolic process;GO:0006665//sphingol…	XP_004249605.1|2.9e-168|PREDICTED: phosphatidylinositol:ceramide inositolphosphotransferase 1-like isoform X2 [Solanum lycopersicum]
Solyc08g080630.3	2.63316	1.41838e-19		GO:0050896//response to stimulus;GO:0009611//response to wounding;GO:0006950//response to stress;GO:0005576//extracellular region;GO:0061135//endopeptidase regulator activity;GO:0030414//peptidase inhibitor activity;GO:0004867//serine-type endopeptidase inhibitor activity;GO:0030234//enzyme regulator activity;GO:0061134//peptidase regulator activity;GO:0004857//enzyme inhibitor activity;GO:000486…	NP_001234615.1|4.2e-51|ethylene-responsive proteinase inhibitor 1 precursor [Solanum lycopersicum]
Solyc10g086680.1	2.63073	4.95028e-25	K13993//HSP20 family protein+ko04141//Protein processing in endoplasmic reticulum		XP_010312365.1|7.3e-136|PREDICTED: 18.1 kDa class I heat shock protein-like [Solanum lycopersicum]
Solyc10g076610.2	2.62222	7.98334e-05	K04567//lysyl-tRNA synthetase, class II [EC:6.1.1.6]+ko00970//Aminoacyl-tRNA biosynthesis	GO:0090304//nucleic acid metabolic process;GO:0006807//nitrogen compound metabolic process;GO:0006399//tRNA metabolic process;GO:0034660//ncRNA metabolic process;GO:0043039//tRNA aminoacylation;GO:0019538//protein metabolic process;GO:0044267//cellular protein metabolic process;GO:0019752//carboxylic acid metabolic process;GO:0006418//tRNA aminoacylation for protein translation;GO:0006430//lysyl-…	XP_015089571.1|0.0e+00|PREDICTED: lysine--tRNA ligase [Solanum pennellii]
Solyc01g095930.3	2.61716	5.45163e-41	K15406//wax-ester synthase / diacylglycerol O-acyltransferase [EC:2.3.1.75 2.3.1.20]+ko00073//Cutin, suberine and wax biosynthesis	GO:0008152//metabolic process;GO:0009987//cellular process;GO:0006629//lipid metabolic process;GO:0044249//cellular biosynthetic process;GO:0008610//lipid biosynthetic process;GO:1901576//organic substance biosynthetic process;GO:0044255//cellular lipid metabolic process;GO:0071704//organic substance metabolic process;GO:0044238//primary metabolic process;GO:0009058//biosynthetic process;GO:00464…	XP_010315460.1|2.0e-284|PREDICTED: LOW QUALITY PROTEIN: O-acyltransferase WSD1 [Solanum lycopersicum]
Solyc03g112100.3	2.61108	3.96279e-19		GO:0010035//response to inorganic substance;GO:0050896//response to stimulus;GO:0042221//response to chemical;GO:0001101//response to acid chemical;GO:0071705//nitrogen compound transport;GO:0015698//inorganic anion transport;GO:0006820//anion transport;GO:0006811//ion transport;GO:0015706//nitrate transport;GO:0051179//localization;GO:0010167//response to nitrate;GO:0006810//transport;GO:1901698…	XP_010319027.1|7.2e-112|PREDICTED: high-affinity nitrate transporter 3.2-like [Solanum lycopersicum]
Solyc06g070990.3	2.60398	1.57493e-06	K18835//WRKY transcription factor 2+ko04626//Plant-pathogen interaction;K18834//WRKY transcription factor 1+ko04626//Plant-pathogen interaction	GO:0044237//cellular metabolic process;GO:0046483//heterocycle metabolic process;GO:0016070//RNA metabolic process;GO:0034641//cellular nitrogen compound metabolic process;GO:0071704//organic substance metabolic process;GO:1901576//organic substance biosynthetic process;GO:0019438//aromatic compound biosynthetic process;GO:0009059//macromolecule biosynthetic process;GO:0006351//transcription, DNA…	NP_001234773.2|0.0e+00|WRKY72b [Solanum lycopersicum]
Solyc09g089930.2	2.60206	1.74469e-55	K14516//ethylene-responsive transcription factor 1+ko04016//MAPK signaling pathway - plant+ko04075//Plant hormone signal transduction	GO:0006351//transcription, DNA-templated;GO:0043170//macromolecule metabolic process;GO:0009059//macromolecule biosynthetic process;GO:0018130//heterocycle biosynthetic process;GO:0034641//cellular nitrogen compound metabolic process;GO:0097659//nucleic acid-templated transcription;GO:0071704//organic substance metabolic process;GO:0046483//heterocycle metabolic process;GO:0044271//cellular nitro…	NP_001234818.1|1.9e-125|ethylene responsive element binding protein [Solanum lycopersicum]
Solyc02g071475.1	2.58072	7.22556e-10	K05658//ATP-binding cassette, subfamily B (MDR/TAP), member 1 [EC:7.6.2.2]+ko02010//ABC transporters;K05278//flavonol synthase [EC:1.14.20.6]+ko01100//Metabolic pathways+ko01110//Biosynthesis of secondary metabolites+ko00941//Flavonoid biosynthesis	GO:0005488//binding;GO:0043167//ion binding;GO:0046872//metal ion binding;GO:0003824//catalytic activity;GO:0016491//oxidoreductase activity;GO:0043169//cation binding;	XP_019067813.1|2.6e-206|PREDICTED: protein SRG1-like [Solanum lycopersicum]
Solyc03g033840.3	2.57257	1.50813e-148	K08900//mitochondrial chaperone BCS1	GO:0005524//ATP binding;GO:0017076//purine nucleotide binding;GO:0008144//drug binding;GO:0043168//anion binding;GO:0000166//nucleotide binding;GO:0035639//purine ribonucleoside triphosphate binding;GO:0032555//purine ribonucleotide binding;GO:0030554//adenyl nucleotide binding;GO:1901363//heterocyclic compound binding;GO:1901265//nucleoside phosphate binding;GO:0097159//organic cyclic compound b…	XP_004234549.1|2.0e-290|PREDICTED: AAA-ATPase At3g50940-like [Solanum lycopersicum]
Solyc08g080670.1	2.56782	1.72278e-60	K04733//interleukin-1 receptor-associated kinase 4 [EC:2.7.11.1]		NP_001234351.2|1.7e-159|PR5-like protein precursor [Solanum lycopersicum]
Solyc02g082910.3	2.56563	0.000132894	K00666//fatty-acyl-CoA synthase [EC:6.2.1.-]	GO:0008152//metabolic process;GO:0003824//catalytic activity;	XP_004232549.1|0.0e+00|PREDICTED: probable acyl-activating enzyme 1, peroxisomal [Solanum lycopersicum]
Solyc03g119390.3	2.54995	7.66367e-29	K04733//interleukin-1 receptor-associated kinase 4 [EC:2.7.11.1];K11253//histone H3;K16189//phytochrome-interacting factor 4+ko04075//Plant hormone signal transduction;K12126//phytochrome-interacting factor 3+ko04712//Circadian rhythm - plant+ko04075//Plant hormone signal transduction	GO:0005488//binding;GO:0046983//protein dimerization activity;GO:0005515//protein binding;	XP_004235809.1|9.2e-151|PREDICTED: transcription factor BEE 3 [Solanum lycopersicum]
Solyc06g072670.3	2.54236	8.49765e-18	K22418//11beta/17beta-hydroxysteroid dehydrogenase [EC:1.1.1.146 1.1.1.-]	GO:0044425//membrane part;GO:0016021//integral component of membrane;GO:0031224//intrinsic component of membrane;GO:0016020//membrane;GO:0003824//catalytic activity;GO:0016491//oxidoreductase activity;	XP_004241449.1|5.2e-198|PREDICTED: 11-beta-hydroxysteroid dehydrogenase 1B-like [Solanum lycopersicum]
Solyc08g016584.1	2.5414	7.5217e-06			XP_015086631.1|2.7e-66|PREDICTED: uncharacterized protein LOC107029705 [Solanum pennellii]
Solyc06g061280.3	2.53475	2.64634e-57	K09753//cinnamoyl-CoA reductase [EC:1.2.1.44]+ko01100//Metabolic pathways+ko01110//Biosynthesis of secondary metabolites+ko00940//Phenylpropanoid biosynthesis	GO:1901362//organic cyclic compound biosynthetic process;GO:0008610//lipid biosynthetic process;GO:0006629//lipid metabolic process;GO:0071704//organic substance metabolic process;GO:0008202//steroid metabolic process;GO:0006694//steroid biosynthetic process;GO:0009058//biosynthetic process;GO:1901576//organic substance biosynthetic process;GO:1901360//organic cyclic compound metabolic process;GO…	XP_004241958.1|4.1e-181|PREDICTED: cinnamoyl-CoA reductase-like SNL6 [Solanum lycopersicum]
Solyc12g011350.2	2.50674	9.35077e-11			XP_009800393.1|5.4e-21|PREDICTED: uncharacterized protein LOC104246297 [Nicotiana sylvestris]
Solyc03g025350.3	2.50674	9.00972e-07		GO:0051179//localization;GO:0055085//transmembrane transport;GO:0051234//establishment of localization;GO:0006810//transport;GO:0016020//membrane;GO:0031224//intrinsic component of membrane;GO:0044425//membrane part;GO:0016021//integral component of membrane;	XP_010317628.1|1.8e-292|PREDICTED: putative transporter arsB [Solanum lycopersicum]
Solyc01g073830.1	2.50674	3.5457e-05			XP_004229362.2|7.8e-194|PREDICTED: uncharacterized protein LOC101255237 [Solanum lycopersicum]
Solyc10g079220.2	2.50265	0.000183291	K12862//pleiotropic regulator 1+ko03040//Spliceosome	GO:1901362//organic cyclic compound biosynthetic process;GO:0006355//regulation of transcription, DNA-templated;GO:0050794//regulation of cellular process;GO:0009058//biosynthetic process;GO:0018130//heterocycle biosynthetic process;GO:0034645//cellular macromolecule biosynthetic process;GO:0044271//cellular nitrogen compound biosynthetic process;GO:0019438//aromatic compound biosynthetic process…	ABO36626.1|2.6e-192|hypothetical protein LYC_68t000011 [Solanum lycopersicum]
Solyc12g008650.2	2.49003	5.51615e-174	K00469//inositol oxygenase [EC:1.13.99.1]+ko00053//Ascorbate and aldarate metabolism+ko00562//Inositol phosphate metabolism	GO:0006020//inositol metabolic process;GO:0009987//cellular process;GO:0046174//polyol catabolic process;GO:1901616//organic hydroxy compound catabolic process;GO:0044281//small molecule metabolic process;GO:0044282//small molecule catabolic process;GO:0044262//cellular carbohydrate metabolic process;GO:1901615//organic hydroxy compound metabolic process;GO:0044275//cellular carbohydrate cataboli…	NP_001234593.1|2.3e-188|myo-inositol oxygenase [Solanum lycopersicum]
Solyc03g095780.2	2.47319	1.92408e-23	K14496//abscisic acid receptor PYR/PYL family+ko04016//MAPK signaling pathway - plant+ko04075//Plant hormone signal transduction		XP_004235232.1|4.8e-100|PREDICTED: abscisic acid receptor PYL4 [Solanum lycopersicum]
Solyc10g005320.3	2.4711	0	K01696//tryptophan synthase beta chain [EC:4.2.1.20]+ko01230//Biosynthesis of amino acids+ko01100//Metabolic pathways+ko01110//Biosynthesis of secondary metabolites+ko00260//Glycine, serine and threonine metabolism+ko00400//Phenylalanine, tyrosine and tryptophan biosynthesis	GO:1901564//organonitrogen compound metabolic process;GO:0006807//nitrogen compound metabolic process;GO:0044281//small molecule metabolic process;GO:0006082//organic acid metabolic process;GO:0009073//aromatic amino acid family biosynthetic process;GO:0034641//cellular nitrogen compound metabolic process;GO:0046394//carboxylic acid biosynthetic process;GO:0009072//aromatic amino acid family meta…	XP_004248398.1|3.1e-269|PREDICTED: tryptophan synthase beta chain 1-like [Solanum lycopersicum]
Solyc06g008400.2	2.46445	0.000483258	K13453//disease resistance protein+ko04626//Plant-pathogen interaction;K07198//5'-AMP-activated protein kinase, catalytic alpha subunit [EC:2.7.11.11]	GO:0065007//biological regulation;GO:0023052//signaling;GO:0007165//signal transduction;GO:0050896//response to stimulus;GO:0050794//regulation of cellular process;GO:0006950//response to stress;GO:0007154//cell communication;GO:0009987//cellular process;GO:0006952//defense response;GO:0050789//regulation of biological process;GO:0051716//cellular response to stimulus;GO:0005623//cell;GO:0071944/…	NP_001318028.1|0.0e+00|NBS-LRR resistance protein-like protein [Solanum lycopersicum]
Solyc12g097000.2	2.46384	2.3201e-124	K13414//mitogen-activated protein kinase kinase kinase 1 [EC:2.7.11.25]+ko04016//MAPK signaling pathway - plant+ko04626//Plant-pathogen interaction;K19613//leucine-rich repeat protein SHOC2;K13459//disease resistance protein RPS2+ko04626//Plant-pathogen interaction;K08852//serine/threonine-protein kinase/endoribonuclease IRE1 [EC:2.7.11.1 3.1.26.-]+ko04141//Protein processing in endoplasmic retic…	GO:0007165//signal transduction;GO:0007154//cell communication;GO:0023052//signaling;GO:0050794//regulation of cellular process;GO:0050789//regulation of biological process;GO:0050896//response to stimulus;GO:0051716//cellular response to stimulus;GO:0065007//biological regulation;GO:0009987//cellular process;	XP_015061155.1|7.7e-112|PREDICTED: TMV resistance protein N-like [Solanum pennellii]
Solyc04g074050.3	2.45634	0	K17422//large subunit ribosomal protein L41;K13420//LRR receptor-like serine/threonine-protein kinase FLS2 [EC:2.7.11.1]+ko04016//MAPK signaling pathway - plant+ko04626//Plant-pathogen interaction	GO:0044425//membrane part;GO:0031224//intrinsic component of membrane;GO:0016020//membrane;GO:0016021//integral component of membrane;GO:0016301//kinase activity;GO:0017076//purine nucleotide binding;GO:0016772//transferase activity, transferring phosphorus-containing groups;GO:0097159//organic cyclic compound binding;GO:0016740//transferase activity;GO:0032555//purine ribonucleotide binding;GO:0…	XP_004238525.1|0.0e+00|PREDICTED: MDIS1-interacting receptor like kinase 2-like isoform X1 [Solanum lycopersicum]
Solyc12g009450.2	2.45111	1.97006e-81	K13457//disease resistance protein RPM1+ko04626//Plant-pathogen interaction;K13453//disease resistance protein+ko04626//Plant-pathogen interaction		XP_019066849.1|0.0e+00|PREDICTED: putative late blight resistance protein homolog R1B-16 [Solanum lycopersicum]
Solyc02g082560.1	2.44534	0.000364279	K01937//CTP synthase [EC:6.3.4.2]+ko01100//Metabolic pathways+ko00240//Pyrimidine metabolism
Solyc01g098060.1	2.44534	0.000364279	K12412//pheromone receptor transcription factor	GO:0034645//cellular macromolecule biosynthetic process;GO:0034654//nucleobase-containing compound biosynthetic process;GO:0019222//regulation of metabolic process;GO:0006351//transcription, DNA-templated;GO:0043170//macromolecule metabolic process;GO:0044260//cellular macromolecule metabolic process;GO:0050789//regulation of biological process;GO:0010468//regulation of gene expression;GO:0051252…	XP_004231248.1|6.3e-80|PREDICTED: agamous-like MADS-box protein AGL23 [Solanum lycopersicum]
Solyc03g019690.1	2.44534	0.000364279		GO:0061135//endopeptidase regulator activity;GO:0061134//peptidase regulator activity;GO:0004866//endopeptidase inhibitor activity;GO:0098772//molecular function regulator;GO:0030414//peptidase inhibitor activity;GO:0004857//enzyme inhibitor activity;GO:0030234//enzyme regulator activity;	XP_004234308.1|2.4e-125|PREDICTED: serine protease inhibitor 5-like [Solanum lycopersicum]
Solyc04g054385.1	2.43203	0.000261932	K10398//kinesin family member 11;K11866//STAM-binding protein [EC:3.4.19.12]+ko04144//Endocytosis;K04733//interleukin-1 receptor-associated kinase 4 [EC:2.7.11.1];K21437//ankyrin repeat domain-containing protein 13;K20799//BRISC complex subunit Abro1	GO:1901363//heterocyclic compound binding;GO:0097159//organic cyclic compound binding;GO:0005488//binding;GO:0003677//DNA binding;GO:0005515//protein binding;GO:0046983//protein dimerization activity;GO:0003676//nucleic acid binding;	XP_015081314.1|2.3e-97|PREDICTED: zinc finger BED domain-containing protein RICESLEEPER 2-like [Solanum pennellii]
Solyc02g072470.3	2.43164	5.27856e-18	K13420//LRR receptor-like serine/threonine-protein kinase FLS2 [EC:2.7.11.1]+ko04016//MAPK signaling pathway - plant+ko04626//Plant-pathogen interaction	GO:0044425//membrane part;GO:0016021//integral component of membrane;GO:0031224//intrinsic component of membrane;GO:0016020//membrane;GO:1901265//nucleoside phosphate binding;GO:0005488//binding;GO:0016740//transferase activity;GO:0004674//protein serine/threonine kinase activity;GO:0032559//adenyl ribonucleotide binding;GO:0008144//drug binding;GO:0032555//purine ribonucleotide binding;GO:000016…	XP_010316829.1|0.0e+00|PREDICTED: probable LRR receptor-like serine/threonine-protein kinase At3g47570 [Solanum lycopersicum]
Solyc01g107780.3	2.43133	1.66055e-27	K14595//abscisate beta-glucosyltransferase [EC:2.4.1.263]+ko00906//Carotenoid biosynthesis+ko01100//Metabolic pathways+ko01110//Biosynthesis of secondary metabolites;K13496//UDP-glucosyl transferase 73C [EC:2.4.1.-]	GO:0008152//metabolic process;GO:0005622//intracellular;GO:0044424//intracellular part;GO:0005623//cell;GO:0043227//membrane-bounded organelle;GO:0044464//cell part;GO:0043229//intracellular organelle;GO:0043231//intracellular membrane-bounded organelle;GO:0043226//organelle;GO:0008194//UDP-glycosyltransferase activity;GO:0016740//transferase activity;GO:0016758//transferase activity, transferrin…	XP_004230753.1|6.5e-272|PREDICTED: scopoletin glucosyltransferase-like [Solanum lycopersicum]
Solyc02g085910.3	2.42767	2.21968e-19	K13945//LOB domain-containing protein 29		NP_001334838.1|8.0e-155|LOB domain-containing protein 40 [Solanum lycopersicum]
Solyc12g096730.3	2.42428	1.54423e-05	K01184//polygalacturonase [EC:3.2.1.15]+ko00040//Pentose and glucuronate interconversions+ko01100//Metabolic pathways	GO:0044238//primary metabolic process;GO:0071704//organic substance metabolic process;GO:0008152//metabolic process;GO:0071840//cellular component organization or biogenesis;GO:0045229//external encapsulating structure organization;GO:0016043//cellular component organization;GO:0005975//carbohydrate metabolic process;GO:0071555//cell wall organization;GO:0071554//cell wall organization or biogene…	NP_001307818.1|5.2e-231|polygalacturonase [Solanum lycopersicum]
Solyc07g039410.3	2.41648	5.68319e-10	K13457//disease resistance protein RPM1+ko04626//Plant-pathogen interaction	GO:0051716//cellular response to stimulus;GO:0045087//innate immune response;GO:0033554//cellular response to stress;GO:0065007//biological regulation;GO:0050794//regulation of cellular process;GO:0006955//immune response;GO:0009987//cellular process;GO:0007165//signal transduction;GO:0008219//cell death;GO:0050789//regulation of biological process;GO:0006950//response to stress;GO:0023052//signa…	XP_004236838.1|7.4e-84|PREDICTED: disease resistance protein RPP13-like [Solanum lycopersicum]
Solyc05g050870.3	2.41619	0.000457802	K00430//peroxidase [EC:1.11.1.7]+ko01100//Metabolic pathways+ko01110//Biosynthesis of secondary metabolites+ko00940//Phenylpropanoid biosynthesis	GO:0072593//reactive oxygen species metabolic process;GO:0009987//cellular process;GO:0009056//catabolic process;GO:0017144//drug metabolic process;GO:0051187//cofactor catabolic process;GO:0051186//cofactor metabolic process;GO:0050896//response to stimulus;GO:0044248//cellular catabolic process;GO:0042737//drug catabolic process;GO:0044237//cellular metabolic process;GO:0008152//metabolic proce…	XP_009803848.1|7.2e-120|PREDICTED: cationic peroxidase 1-like [Nicotiana sylvestris]
Solyc01g060215.1	2.4072	9.5966e-05		GO:0019222//regulation of metabolic process;GO:0010605//negative regulation of macromolecule metabolic process;GO:0016458//gene silencing;GO:0060255//regulation of macromolecule metabolic process;GO:0031047//gene silencing by RNA;GO:0050789//regulation of biological process;GO:0009987//cellular process;GO:0010468//regulation of gene expression;GO:0009892//negative regulation of metabolic process;…	XP_015055049.1|7.3e-43|PREDICTED: uncharacterized protein LOC107001570 [Solanum pennellii]
Solyc01g108320.3	2.39982	4.79229e-11	K00430//peroxidase [EC:1.11.1.7]+ko01100//Metabolic pathways+ko01110//Biosynthesis of secondary metabolites+ko00940//Phenylpropanoid biosynthesis	GO:0072593//reactive oxygen species metabolic process;GO:0051186//cofactor metabolic process;GO:0006979//response to oxidative stress;GO:0009987//cellular process;GO:0042744//hydrogen peroxide catabolic process;GO:0017144//drug metabolic process;GO:0008152//metabolic process;GO:0050896//response to stimulus;GO:0009056//catabolic process;GO:0042743//hydrogen peroxide metabolic process;GO:0006950//…	NP_001304861.1|6.6e-191|peroxidase 10 precursor [Solanum lycopersicum]
Solyc02g088956.1	2.38942	1.64852e-05	K08739//DNA mismatch repair protein MLH3+ko03430//Mismatch repair		XP_019067925.1|4.0e-16|PREDICTED: DNA mismatch repair protein MLH3 isoform X5 [Solanum lycopersicum]
Solyc08g016586.1	2.38864	3.29607e-17			XP_010324752.1|1.0e-294|PREDICTED: uncharacterized protein LOC104648659 isoform X1 [Solanum lycopersicum]
Solyc05g010475.1	2.3722	0.000352927	K00993//ethanolaminephosphotransferase [EC:2.7.8.1]+ko00440//Phosphonate and phosphinate metabolism+ko01100//Metabolic pathways+ko01110//Biosynthesis of secondary metabolites+ko00564//Glycerophospholipid metabolism+ko00565//Ether lipid metabolism		XP_004239001.1|3.3e-240|PREDICTED: uncharacterized protein LOC101251473 isoform X1 [Solanum lycopersicum]
Solyc05g056550.3	2.36498	0.000789999	K14498//serine/threonine-protein kinase SRK2 [EC:2.7.11.1]+ko04016//MAPK signaling pathway - plant+ko04075//Plant hormone signal transduction	GO:0006468//protein phosphorylation;GO:0043170//macromolecule metabolic process;GO:0050789//regulation of biological process;GO:0050896//response to stimulus;GO:0006464//cellular protein modification process;GO:0023052//signaling;GO:0044238//primary metabolic process;GO:0036211//protein modification process;GO:0006796//phosphate-containing compound metabolic process;GO:0007165//signal transductio…	XP_004239628.1|2.4e-208|PREDICTED: serine/threonine-protein kinase SAPK7 [Solanum lycopersicum]
Solyc04g007000.1	2.36388	0	K09287//RAV-like factor	GO:0010467//gene expression;GO:0034654//nucleobase-containing compound biosynthetic process;GO:0097659//nucleic acid-templated transcription;GO:0006351//transcription, DNA-templated;GO:0046483//heterocycle metabolic process;GO:0044260//cellular macromolecule metabolic process;GO:1901360//organic cyclic compound metabolic process;GO:0032774//RNA biosynthetic process;GO:0009058//biosynthetic proces…	XP_004236999.1|6.8e-213|PREDICTED: AP2/ERF and B3 domain-containing transcription factor RAV1 [Solanum lycopersicum]
Solyc01g073820.3	2.36288	2.57844e-13	K17609//nucleoredoxin [EC:1.8.1.8]		XP_019068254.1|3.1e-158|PREDICTED: uncharacterized protein LOC101249296 [Solanum lycopersicum]
Solyc08g016581.1	2.35865	4.0484e-05	K16302//metal transporter CNNM		XP_010317748.1|3.9e-60|PREDICTED: putative ubiquitin-like-specific protease 1B [Solanum lycopersicum]
Solyc10g076670.2	2.35667	1.91181e-05	K05277//anthocyanidin synthase [EC:1.14.20.4]+ko01100//Metabolic pathways+ko01110//Biosynthesis of secondary metabolites+ko00941//Flavonoid biosynthesis	GO:0046872//metal ion binding;GO:0005488//binding;GO:0003824//catalytic activity;GO:0016491//oxidoreductase activity;GO:0043167//ion binding;GO:0051213//dioxygenase activity;GO:0043169//cation binding;	XP_010312367.1|1.2e-127|PREDICTED: leucoanthocyanidin dioxygenase-like, partial [Solanum lycopersicum]
Solyc03g080190.3	2.35487	2.9082e-274	K00475//naringenin 3-dioxygenase [EC:1.14.11.9]+ko01100//Metabolic pathways+ko01110//Biosynthesis of secondary metabolites+ko00941//Flavonoid biosynthesis	GO:0051213//dioxygenase activity;GO:0003824//catalytic activity;GO:0016491//oxidoreductase activity;GO:0043167//ion binding;GO:0043169//cation binding;GO:0005488//binding;GO:0046872//metal ion binding;	XP_009608170.1|8.4e-183|PREDICTED: protein DOWNY MILDEW RESISTANCE 6 [Nicotiana tomentosiformis]
Solyc05g015300.3	2.35474	0.000156815	K12472//epidermal growth factor receptor substrate 15+ko04144//Endocytosis		XP_004239211.1|2.5e-195|PREDICTED: BURP domain protein RD22 [Solanum lycopersicum]
Solyc03g095610.3	2.35447	1.96815e-22	K04733//interleukin-1 receptor-associated kinase 4 [EC:2.7.11.1]		XP_004235450.1|0.0e+00|PREDICTED: uncharacterized protein LOC101254071 [Solanum lycopersicum]
Solyc01g110860.1	2.34804	1.7378e-06	K14488//SAUR family protein+ko04075//Plant hormone signal transduction	GO:0009719//response to endogenous stimulus;GO:0009725//response to hormone;GO:0050896//response to stimulus;GO:0009733//response to auxin;GO:0042221//response to chemical;GO:0010033//response to organic substance;	XP_015083296.1|5.0e-49|PREDICTED: auxin-responsive protein SAUR21-like [Solanum pennellii]
Solyc09g082530.2	2.34804	1.7378e-06	K13420//LRR receptor-like serine/threonine-protein kinase FLS2 [EC:2.7.11.1]+ko04016//MAPK signaling pathway - plant+ko04626//Plant-pathogen interaction		XP_004247590.1|3.7e-206|PREDICTED: leucine-rich repeat extensin-like protein 6 [Solanum lycopersicum]
Solyc04g054225.1	2.34174	9.4853e-06	K20562//biphenyl-4-hydroxylase		XP_004237616.1|1.2e-43|PREDICTED: cytochrome P450 CYP736A12-like [Solanum lycopersicum]
Solyc12g006770.1	2.33754	5.38636e-11			OIT01608.1|4.1e-25|hypothetical protein A4A49_04990 [Nicotiana attenuata]
Solyc11g006090.2	2.33681	4.14028e-05	K23047//E3 ubiquitin-protein ligase UNKL [EC:2.3.2.27];K02184//formin 2	GO:0006351//transcription, DNA-templated;GO:0044260//cellular macromolecule metabolic process;GO:1901576//organic substance biosynthetic process;GO:0010467//gene expression;GO:0006725//cellular aromatic compound metabolic process;GO:0006139//nucleobase-containing compound metabolic process;GO:0034645//cellular macromolecule biosynthetic process;GO:0071704//organic substance metabolic process;GO:0…	XP_004249915.1|3.7e-170|PREDICTED: AT-hook motif nuclear-localized protein 20 [Solanum lycopersicum]
Solyc01g108360.3	2.32772	6.42154e-05		GO:0031224//intrinsic component of membrane;GO:0016020//membrane;GO:0044425//membrane part;GO:0016021//integral component of membrane;GO:0016491//oxidoreductase activity;GO:0003824//catalytic activity;GO:0009055//electron transfer activity;	XP_019068922.1|2.1e-96|PREDICTED: uncharacterized protein LOC109120010 [Solanum lycopersicum]
Solyc04g011767.1	2.32388	1.0828e-05			XP_004236723.1|7.7e-52|PREDICTED: uncharacterized protein LOC101253579 [Solanum lycopersicum]
Solyc12g056590.2	2.32171	9.83634e-13	K12900//FUS-interacting serine-arginine-rich protein 1+ko03040//Spliceosome;K09286//EREBP-like factor		NP_001332990.1|4.5e-205|ethylene-responsive transcription factor 2a isoform 2 [Solanum lycopersicum]
Solyc06g063200.2	2.31187	0.000979461	K05387//glutamate receptor, ionotropic, plant	GO:0016021//integral component of membrane;GO:0016020//membrane;GO:0044425//membrane part;GO:0031224//intrinsic component of membrane;GO:0004888//transmembrane signaling receptor activity;GO:0015075//ion transmembrane transporter activity;GO:0038023//signaling receptor activity;GO:0022824//transmitter-gated ion channel activity;GO:0060089//molecular transducer activity;GO:0015276//ligand-gated io…	XP_004242263.1|0.0e+00|PREDICTED: glutamate receptor 2.9 [Solanum lycopersicum]
Solyc10g076500.2	2.30829	1.0785e-53	K19613//leucine-rich repeat protein SHOC2	GO:0016020//membrane;GO:0044425//membrane part;GO:0031224//intrinsic component of membrane;GO:0016021//integral component of membrane;	XP_004249716.1|0.0e+00|PREDICTED: receptor-like protein 12 [Solanum lycopersicum]
Solyc04g076925.1	2.29985	0.000242413	K22807//werner syndrome-like exonuclease [EC:3.1.11.-];K20777//exonuclease 3'-5' domain-containing protein 2 [EC:3.1.11.1]	GO:0005737//cytoplasm;GO:0005622//intracellular;GO:0043226//organelle;GO:0043231//intracellular membrane-bounded organelle;GO:0043227//membrane-bounded organelle;GO:0043229//intracellular organelle;GO:0005623//cell;GO:0044424//intracellular part;GO:0044464//cell part;GO:0005634//nucleus;GO:0003676//nucleic acid binding;GO:0016788//hydrolase activity, acting on ester bonds;GO:0003824//catalytic ac…	XP_006364967.1|1.5e-39|PREDICTED: Werner Syndrome-like exonuclease [Solanum tuberosum]
Solyc12g094635.1	2.29369	3.2008e-20	K05298//glyceraldehyde-3-phosphate dehydrogenase (NADP+) (phosphorylating) [EC:1.2.1.13]+ko01100//Metabolic pathways+ko00710//Carbon fixation in photosynthetic organisms+ko01200//Carbon metabolism	GO:0005975//carbohydrate metabolic process;GO:0019318//hexose metabolic process;GO:0005996//monosaccharide metabolic process;GO:0044238//primary metabolic process;GO:0071704//organic substance metabolic process;GO:0008152//metabolic process;GO:0044281//small molecule metabolic process;GO:0006006//glucose metabolic process;GO:0051287//NAD binding;GO:0005488//binding;GO:0036094//small molecule bind…	XP_006342537.1|3.5e-24|PREDICTED: glyceraldehyde-3-phosphate dehydrogenase B, chloroplastic [Solanum tuberosum]
Solyc04g079370.3	2.29101	6.72649e-05	K13963//serpin B	GO:0031224//intrinsic component of membrane;GO:0005576//extracellular region;GO:0044421//extracellular region part;GO:0016020//membrane;GO:0016021//integral component of membrane;GO:0044425//membrane part;GO:0005615//extracellular space;	XP_019069235.1|1.5e-134|PREDICTED: LOW QUALITY PROTEIN: serpin-Z10-like [Solanum lycopersicum]
Solyc03g093390.3	2.25808	7.26295e-05	K20628//expansin	GO:0019953//sexual reproduction;GO:0022414//reproductive process;GO:0000003//reproduction;GO:0044703//multi-organism reproductive process;GO:0051704//multi-organism process;GO:0016020//membrane;GO:0044425//membrane part;GO:0016021//integral component of membrane;GO:0005576//extracellular region;GO:0031224//intrinsic component of membrane;	NP_001233766.1|3.2e-126|beta expansin precursor [Solanum lycopersicum]
Solyc12g096960.2	2.2517	2.14493e-22	K05387//glutamate receptor, ionotropic, plant	GO:0006952//defense response;GO:0009607//response to biotic stimulus;GO:0006950//response to stress;GO:0050896//response to stimulus;	XP_004253021.1|4.2e-86|PREDICTED: pathogenesis-related protein STH-2-like [Solanum lycopersicum]
Solyc11g011180.2	2.2497	1.00601e-57	K13466//EIX receptor 1/2+ko04626//Plant-pathogen interaction;K13420//LRR receptor-like serine/threonine-protein kinase FLS2 [EC:2.7.11.1]+ko04016//MAPK signaling pathway - plant+ko04626//Plant-pathogen interaction	GO:0044425//membrane part;GO:0016020//membrane;GO:0031224//intrinsic component of membrane;GO:0016021//integral component of membrane;GO:0016301//kinase activity;GO:0016740//transferase activity;GO:0003824//catalytic activity;GO:0016772//transferase activity, transferring phosphorus-containing groups;	XP_004250531.1|0.0e+00|PREDICTED: probable LRR receptor-like serine/threonine-protein kinase At4g36180 isoform X1 [Solanum lycopersicum]
Solyc04g007250.1	2.24371	3.46236e-08		GO:0044425//membrane part;GO:0016021//integral component of membrane;GO:0031224//intrinsic component of membrane;GO:0016020//membrane;	XP_010319421.1|4.8e-152|PREDICTED: uncharacterized protein LOC104646739 [Solanum lycopersicum]
Solyc07g042230.1	2.24371	2.84546e-05	K09286//EREBP-like factor	GO:0034645//cellular macromolecule biosynthetic process;GO:0018130//heterocycle biosynthetic process;GO:0006725//cellular aromatic compound metabolic process;GO:1901360//organic cyclic compound metabolic process;GO:0097659//nucleic acid-templated transcription;GO:0090304//nucleic acid metabolic process;GO:0010467//gene expression;GO:0009987//cellular process;GO:0043170//macromolecule metabolic pr…	XP_004243693.1|1.8e-91|PREDICTED: ethylene-responsive transcription factor ERF018-like [Solanum lycopersicum]
Solyc04g040180.3	2.23616	8.41522e-68	K08869//aarF domain-containing kinase	GO:0008152//metabolic process;GO:0032259//methylation;GO:0044464//cell part;GO:0005622//intracellular;GO:0044424//intracellular part;GO:0005623//cell;GO:0005737//cytoplasm;GO:0016740//transferase activity;GO:0016741//transferase activity, transferring one-carbon groups;GO:0008168//methyltransferase activity;GO:0008757//S-adenosylmethionine-dependent methyltransferase activity;GO:0003824//catalyti…	XP_004237334.1|3.8e-153|PREDICTED: putative methyltransferase DDB_G0268948 [Solanum lycopersicum]
Solyc02g083880.3	2.23311	2.25415e-143	K20887//xyloglucan glycosyltransferase 4 [EC:2.4.1.-];K03860//phosphatidylinositol glycan, class Q+ko01100//Metabolic pathways+ko00563//Glycosylphosphatidylinositol (GPI)-anchor biosynthesis		XP_004232490.1|7.1e-58|PREDICTED: gibberellin-regulated protein 11 [Solanum lycopersicum]
Solyc11g018800.2	2.22774	3.68663e-167	K00430//peroxidase [EC:1.11.1.7]+ko01100//Metabolic pathways+ko01110//Biosynthesis of secondary metabolites+ko00940//Phenylpropanoid biosynthesis		XP_004250402.1|1.2e-179|PREDICTED: lignin-forming anionic peroxidase [Solanum lycopersicum]
Solyc08g080660.1	2.22685	1.86177e-121	K04733//interleukin-1 receptor-associated kinase 4 [EC:2.7.11.1]		NP_001317712.1|3.5e-160|pathogenesis-related protein PR-5 precursor [Solanum lycopersicum]
Solyc03g112980.1	2.22434	9.97111e-10			XP_004236206.1|3.3e-17|PREDICTED: uncharacterized protein LOC101250588 [Solanum lycopersicum]
Solyc12g005920.2	2.21456	8.15407e-07	K17275//plastin-1	GO:0006996//organelle organization;GO:0007010//cytoskeleton organization;GO:0061572//actin filament bundle organization;GO:0030036//actin cytoskeleton organization;GO:0051764//actin crosslink formation;GO:0044085//cellular component biogenesis;GO:0016043//cellular component organization;GO:0030029//actin filament-based process;GO:0051017//actin filament bundle assembly;GO:0097435//supramolecular …	XP_016541430.1|0.0e+00|PREDICTED: fimbrin-5 [Capsicum annuum]
Solyc12g094650.2	2.20086	8.03838e-153	K00784//ribonuclease Z [EC:3.1.26.11]+ko03013//RNA transport;K05298//glyceraldehyde-3-phosphate dehydrogenase (NADP+) (phosphorylating) [EC:1.2.1.13]+ko01100//Metabolic pathways+ko00710//Carbon fixation in photosynthetic organisms+ko01200//Carbon metabolism	GO:0044425//membrane part;GO:0016021//integral component of membrane;GO:0016020//membrane;GO:0031224//intrinsic component of membrane;	XP_004253121.1|0.0e+00|PREDICTED: uncharacterized protein LOC101249163 [Solanum lycopersicum]
Solyc08g006740.3	2.20038	6.09133e-31	K22427//phenylalanine decarboxylase [EC:4.1.1.53]+ko00360//Phenylalanine metabolism	GO:0009987//cellular process;GO:0044237//cellular metabolic process;GO:0019752//carboxylic acid metabolic process;GO:0044281//small molecule metabolic process;GO:0071704//organic substance metabolic process;GO:0043436//oxoacid metabolic process;GO:0006082//organic acid metabolic process;GO:0008152//metabolic process;GO:0048037//cofactor binding;GO:0036094//small molecule binding;GO:0008144//drug …	NP_001233859.1|2.1e-277|aromatic amino acid decarboxylase 2 [Solanum lycopersicum]
Solyc03g115040.3	2.19895	1.70702e-09	K22683//aspartyl protease family protein [EC:3.4.23.-]	GO:0008233//peptidase activity;GO:0004190//aspartic-type endopeptidase activity;GO:0070001//aspartic-type peptidase activity;GO:0003824//catalytic activity;GO:0016787//hydrolase activity;GO:0140096//catalytic activity, acting on a protein;GO:0070011//peptidase activity, acting on L-amino acid peptides;GO:0004175//endopeptidase activity;	XP_004236054.1|4.9e-251|PREDICTED: basic 7S globulin-like [Solanum lycopersicum]
Solyc09g063150.3	2.1948	0.000174213	K00799//glutathione S-transferase [EC:2.5.1.18]+ko00480//Glutathione metabolism	GO:0006790//sulfur compound metabolic process;GO:0006749//glutathione metabolic process;GO:0050896//response to stimulus;GO:0044248//cellular catabolic process;GO:0051186//cofactor metabolic process;GO:0090487//secondary metabolite catabolic process;GO:1901564//organonitrogen compound metabolic process;GO:0043603//cellular amide metabolic process;GO:0034641//cellular nitrogen compound metabolic p…	XP_004247117.1|9.5e-126|PREDICTED: probable glutathione S-transferase [Solanum lycopersicum]
Solyc02g090545.1	2.18686	3.0943e-07	K01537//Ca2+-transporting ATPase [EC:3.6.3.8]		XP_015064915.1|0.0e+00|PREDICTED: calcium-transporting ATPase 12, plasma membrane-type-like, partial [Solanum pennellii]
Solyc10g076480.2	2.18628	1.90248e-23	K03320//ammonium transporter, Amt family	GO:0044425//membrane part;GO:0016021//integral component of membrane;GO:0031224//intrinsic component of membrane;GO:0016020//membrane;GO:0008324//cation transmembrane transporter activity;GO:0022857//transmembrane transporter activity;GO:0015075//ion transmembrane transporter activity;GO:0005215//transporter activity;GO:0008519//ammonium transmembrane transporter activity;	XP_015089587.1|4.0e-287|PREDICTED: ammonium transporter 2 [Solanum pennellii]
Solyc02g062390.3	2.18481	0.000667358		GO:0050896//response to stimulus;GO:0009266//response to temperature stimulus;GO:0009737//response to abscisic acid;GO:0097305//response to alcohol;GO:0009725//response to hormone;GO:0006950//response to stress;GO:0009628//response to abiotic stimulus;GO:0009409//response to cold;GO:0009414//response to water deprivation;GO:0010033//response to organic substance;GO:0033993//response to lipid;GO:1…	XP_004233545.1|9.7e-71|PREDICTED: desiccation-related protein clone PCC27-04 [Solanum lycopersicum]
Solyc03g121230.3	2.18481	0.000667358	K04733//interleukin-1 receptor-associated kinase 4 [EC:2.7.11.1];K16224//senescence-induced receptor-like serine/threonine-protein kinase+ko04016//MAPK signaling pathway - plant+ko04626//Plant-pathogen interaction	GO:0016020//membrane;GO:0031224//intrinsic component of membrane;GO:0016021//integral component of membrane;GO:0044425//membrane part;GO:0036094//small molecule binding;GO:0000166//nucleotide binding;GO:0004672//protein kinase activity;GO:0003824//catalytic activity;GO:0032559//adenyl ribonucleotide binding;GO:0032555//purine ribonucleotide binding;GO:1901363//heterocyclic compound binding;GO:000…	XP_010318523.1|0.0e+00|PREDICTED: senescence-induced receptor-like serine/threonine-protein kinase [Solanum lycopersicum]
Solyc07g049530.3	2.18478	7.70493e-265	K05933//aminocyclopropanecarboxylate oxidase [EC:1.14.17.4]+ko01100//Metabolic pathways+ko01110//Biosynthesis of secondary metabolites+ko00270//Cysteine and methionine metabolism	GO:0000003//reproduction;GO:0010817//regulation of hormone levels;GO:0009693//ethylene biosynthetic process;GO:0048731//system development;GO:0042445//hormone metabolic process;GO:0061458//reproductive system development;GO:0043449//cellular alkene metabolic process;GO:0008152//metabolic process;GO:0010154//fruit development;GO:0009987//cellular process;GO:0042446//hormone biosynthetic process;GO…	NP_001234024.2|2.5e-181|1-aminocyclopropane-1-carboxylate oxidase 1 [Solanum lycopersicum]
Solyc04g007320.2	2.1837	1.37349e-133	K22038//volume-regulated anion channel	GO:0007165//signal transduction;GO:0050896//response to stimulus;GO:0051716//cellular response to stimulus;GO:0065007//biological regulation;GO:0007154//cell communication;GO:0009987//cellular process;GO:0023052//signaling;GO:0050794//regulation of cellular process;GO:0050789//regulation of biological process;GO:0032555//purine ribonucleotide binding;GO:0043167//ion binding;GO:1901265//nucleoside…	XP_004237202.1|0.0e+00|PREDICTED: TMV resistance protein N-like [Solanum lycopersicum]
Solyc04g074905.1	2.1795	5.67768e-05	K03006//DNA-directed RNA polymerase II subunit RPB1 [EC:2.7.7.6]+ko03020//RNA polymerase;K21952//CASK-interacting protein	GO:0031224//intrinsic component of membrane;GO:0016021//integral component of membrane;GO:0016020//membrane;GO:0044425//membrane part;	XP_019069183.1|1.6e-194|PREDICTED: leucine-rich repeat extensin-like protein 5 [Solanum lycopersicum]
Solyc07g008590.1	2.17256	6.25425e-120	K13466//EIX receptor 1/2+ko04626//Plant-pathogen interaction;K19613//leucine-rich repeat protein SHOC2	GO:0016021//integral component of membrane;GO:0031224//intrinsic component of membrane;GO:0016020//membrane;GO:0044425//membrane part;	XP_010323339.1|0.0e+00|PREDICTED: LRR receptor-like serine/threonine-protein kinase GSO1 [Solanum lycopersicum]
Solyc04g076610.2	2.16897	3.59046e-113	K17279//receptor expression-enhancing protein 5/6	GO:0016021//integral component of membrane;GO:0031224//intrinsic component of membrane;GO:0044425//membrane part;GO:0016020//membrane;GO:0043169//cation binding;GO:0003676//nucleic acid binding;GO:0005488//binding;GO:0008270//zinc ion binding;GO:0016893//endonuclease activity, active with either ribo- or deoxyribonucleic acids and producing 5'-phosphomonoesters;GO:0004523//RNA-DNA hybrid ribonucl…	XP_004238018.2|1.7e-277|PREDICTED: uncharacterized protein LOC101261323 [Solanum lycopersicum]
Solyc08g077330.3	2.15983	5.40472e-41	K20628//expansin	GO:0005576//extracellular region;	XP_004245860.1|8.0e-148|PREDICTED: expansin-like B1 [Solanum lycopersicum]
Solyc03g120260.3	2.14971	1.00203e-68	K17302//coatomer subunit beta'	GO:0006890//retrograde vesicle-mediated transport, Golgi to ER;GO:0015031//protein transport;GO:0008104//protein localization;GO:0046907//intracellular transport;GO:0071705//nitrogen compound transport;GO:0051641//cellular localization;GO:0016192//vesicle-mediated transport;GO:0071702//organic substance transport;GO:0034613//cellular protein localization;GO:0045184//establishment of protein local…	XP_004235705.1|1.0e-177|PREDICTED: coatomer subunit beta'-2 [Solanum lycopersicum]
Solyc07g066180.2	2.14885	1.42276e-12		GO:0032553//ribonucleotide binding;GO:0017076//purine nucleotide binding;GO:0032559//adenyl ribonucleotide binding;GO:0097159//organic cyclic compound binding;GO:0043168//anion binding;GO:1901363//heterocyclic compound binding;GO:0005488//binding;GO:0097367//carbohydrate derivative binding;GO:0030554//adenyl nucleotide binding;GO:0036094//small molecule binding;GO:0043167//ion binding;GO:1901265/…	XP_004244328.1|0.0e+00|PREDICTED: uncharacterized protein LOC101258676 [Solanum lycopersicum]
Solyc03g096140.2	2.14611	5.96712e-13			XP_019068219.1|4.9e-43|PREDICTED: protein yippee-like [Solanum lycopersicum]
Solyc12g037950.2	2.14417	0.000279299			XP_004252239.1|1.1e-90|PREDICTED: cell number regulator 2-like [Solanum lycopersicum]
Solyc05g050340.3	2.13379	4.57826e-63	K18835//WRKY transcription factor 2+ko04626//Plant-pathogen interaction;K13426//WRKY transcription factor 29+ko04016//MAPK signaling pathway - plant+ko04626//Plant-pathogen interaction	GO:0006807//nitrogen compound metabolic process;GO:1901362//organic cyclic compound biosynthetic process;GO:0097659//nucleic acid-templated transcription;GO:0034641//cellular nitrogen compound metabolic process;GO:0044237//cellular metabolic process;GO:1901576//organic substance biosynthetic process;GO:0034654//nucleobase-containing compound biosynthetic process;GO:0006139//nucleobase-containing …	XP_006345566.1|4.8e-161|PREDICTED: probable WRKY transcription factor 41 [Solanum tuberosum]
Solyc04g040130.1	2.12603	3.90427e-12	K10256//omega-6 fatty acid desaturase / acyl-lipid omega-6 desaturase (Delta-12 desaturase) [EC:1.14.19.6 1.14.19.22]+ko01212//Fatty acid metabolism+ko01040//Biosynthesis of unsaturated fatty acids	GO:0008152//metabolic process;GO:0006629//lipid metabolic process;GO:0071704//organic substance metabolic process;GO:0044238//primary metabolic process;GO:0044425//membrane part;GO:0016020//membrane;GO:0016021//integral component of membrane;GO:0031224//intrinsic component of membrane;GO:0016705//oxidoreductase activity, acting on paired donors, with incorporation or reduction of molecular oxygen…	XP_004237336.1|1.3e-211|PREDICTED: delta(12)-fatty-acid desaturase FAD2-like [Solanum lycopersicum]
Solyc02g080120.2	2.11008	8.36852e-27	K04125//gibberellin 2beta-dioxygenase [EC:1.14.11.13]+ko00904//Diterpenoid biosynthesis+ko01110//Biosynthesis of secondary metabolites	GO:0046872//metal ion binding;GO:0005488//binding;GO:0043167//ion binding;GO:0016491//oxidoreductase activity;GO:0043169//cation binding;GO:0051213//dioxygenase activity;GO:0003824//catalytic activity;	XP_004232746.2|2.2e-224|PREDICTED: gibberellin 2-beta-dioxygenase 8 [Solanum lycopersicum]
Solyc07g006770.2	2.1045	6.41832e-93	K13420//LRR receptor-like serine/threonine-protein kinase FLS2 [EC:2.7.11.1]+ko04016//MAPK signaling pathway - plant+ko04626//Plant-pathogen interaction	GO:0016021//integral component of membrane;GO:0016020//membrane;GO:0031224//intrinsic component of membrane;GO:0044425//membrane part;GO:0004672//protein kinase activity;GO:0005488//binding;GO:0000166//nucleotide binding;GO:0035639//purine ribonucleoside triphosphate binding;GO:0016772//transferase activity, transferring phosphorus-containing groups;GO:0032555//purine ribonucleotide binding;GO:00…	XP_004242680.2|0.0e+00|PREDICTED: probable LRR receptor-like serine/threonine-protein kinase At3g47570 [Solanum lycopersicum]
Solyc04g048900.3	2.10425	0	K08057//calreticulin+ko04145//Phagosome+ko04141//Protein processing in endoplasmic reticulum	GO:0006457//protein folding;GO:0009987//cellular process;GO:0043227//membrane-bounded organelle;GO:0044464//cell part;GO:0043226//organelle;GO:0043231//intracellular membrane-bounded organelle;GO:0044444//cytoplasmic part;GO:0043229//intracellular organelle;GO:0012505//endomembrane system;GO:0005737//cytoplasm;GO:0044424//intracellular part;GO:0005783//endoplasmic reticulum;GO:0005622//intracellu…	XP_004237555.1|1.8e-254|PREDICTED: calreticulin-3-like [Solanum lycopersicum]
Solyc01g007990.3	2.10076	1.57764e-201	K04733//interleukin-1 receptor-associated kinase 4 [EC:2.7.11.1]		XP_019069412.1|0.0e+00|PREDICTED: cysteine-rich receptor-like protein kinase 2 isoform X1 [Solanum lycopersicum]
Solyc02g084117.1	2.10002	7.84607e-05
Solyc01g103860.3	2.09671	3.73785e-08	K17964//leucine-rich PPR motif-containing protein, mitochondrial		XP_019067347.1|1.0e-234|PREDICTED: COBRA-like protein 6 isoform X1 [Solanum lycopersicum]
Solyc06g072455.1	2.0917	4.90119e-05	K08486//syntaxin 1B/2/3+ko04130//SNARE interactions in vesicular transport		XP_004242143.1|2.9e-97|PREDICTED: DUF724 domain-containing protein 3-like [Solanum lycopersicum]
Solyc03g082690.3	2.09087	1.96985e-187	K08332//vacuolar protein 8	GO:0016740//transferase activity;GO:0140096//catalytic activity, acting on a protein;GO:0003824//catalytic activity;GO:0004842//ubiquitin-protein transferase activity;GO:0019787//ubiquitin-like protein transferase activity;	XP_004235115.1|0.0e+00|PREDICTED: U-box domain-containing protein 43 [Solanum lycopersicum]
Solyc11g007890.2	2.08851	5.787e-07	K06892//feruloyl-CoA ortho-hydroxylase [EC:1.14.11.-]+ko01110//Biosynthesis of secondary metabolites+ko00940//Phenylpropanoid biosynthesis;K05277//anthocyanidin synthase [EC:1.14.20.4]+ko01100//Metabolic pathways+ko01110//Biosynthesis of secondary metabolites+ko00941//Flavonoid biosynthesis;K23145//scopoletin 8-hydroxylase [EC:1.14.11.60]	GO:0016491//oxidoreductase activity;GO:0003824//catalytic activity;GO:0043169//cation binding;GO:0046872//metal ion binding;GO:0005488//binding;GO:0043167//ion binding;	XP_004250021.1|9.9e-217|PREDICTED: protein DMR6-LIKE OXYGENASE 2-like [Solanum lycopersicum]
Solyc07g005765.1	2.07041	1.13861e-24	K13065//shikimate O-hydroxycinnamoyltransferase [EC:2.3.1.133]+ko01100//Metabolic pathways+ko01110//Biosynthesis of secondary metabolites+ko00940//Phenylpropanoid biosynthesis+ko00941//Flavonoid biosynthesis+ko00945//Stilbenoid, diarylheptanoid and gingerol biosynthesis	GO:0016747//transferase activity, transferring acyl groups other than amino-acyl groups;GO:0003824//catalytic activity;GO:0008374//O-acyltransferase activity;GO:0050737//O-hydroxycinnamoyltransferase activity;GO:0047205//quinate O-hydroxycinnamoyltransferase activity;GO:0050734//hydroxycinnamoyltransferase activity;GO:0016746//transferase activity, transferring acyl groups;GO:0016740//transferase…	NP_001234850.2|3.8e-89|hydroxycinnamoyl CoA quinate transferase [Solanum lycopersicum]
Solyc10g011920.2	2.06	2.74451e-08	K10775//phenylalanine ammonia-lyase [EC:4.3.1.24]+ko01100//Metabolic pathways+ko01110//Biosynthesis of secondary metabolites+ko00940//Phenylpropanoid biosynthesis+ko00360//Phenylalanine metabolism	GO:0019439//aromatic compound catabolic process;GO:0009987//cellular process;GO:0019752//carboxylic acid metabolic process;GO:1901362//organic cyclic compound biosynthetic process;GO:0009699//phenylpropanoid biosynthetic process;GO:0009063//cellular amino acid catabolic process;GO:0071704//organic substance metabolic process;GO:0043436//oxoacid metabolic process;GO:0046395//carboxylic acid catabo…	KVH90475.1|0.0e+00|Aromatic amino acid lyase [Cynara cardunculus var. scolymus]
Solyc10g081570.2	2.05964	0	K18626//trichohyalin;K11267//sister chromatid cohesion protein PDS5	GO:0003824//catalytic activity;GO:0016874//ligase activity;	XP_004249379.1|9.9e-238|PREDICTED: ABC transporter F family member 4-like [Solanum lycopersicum]
Solyc07g053900.2	2.05928	8.50349e-06			XP_004243359.1|8.9e-145|PREDICTED: uncharacterized protein LOC101245965 [Solanum lycopersicum]
Solyc11g007430.2	2.04123	5.62625e-12	K04733//interleukin-1 receptor-associated kinase 4 [EC:2.7.11.1]		XP_015057070.1|4.0e-70|PREDICTED: glycerophosphodiester phosphodiesterase protein kinase domain-containing GDPDL2-like [Solanum pennellii]
Solyc03g096640.3	2.03839	1.33005e-08	K08081//tropinone reductase I [EC:1.1.1.206]+ko00960//Tropane, piperidine and pyridine alkaloid biosynthesis+ko01100//Metabolic pathways+ko01110//Biosynthesis of secondary metabolites	GO:0016491//oxidoreductase activity;GO:0003824//catalytic activity;	XP_004235263.1|1.8e-146|PREDICTED: tropinone reductase homolog At5g06060 [Solanum lycopersicum]
Solyc09g075820.3	2.03751	1.04413e-193	K08150//MFS transporter, SP family, solute carrier family 2 (myo-inositol transporter), member 13		XP_019159582.1|2.3e-267|PREDICTED: sugar transport protein 13 isoform X1 [Ipomoea nil]
Solyc10g051070.1	2.03237	3.87663e-05		GO:0006139//nucleobase-containing compound metabolic process;GO:0019222//regulation of metabolic process;GO:0019219//regulation of nucleobase-containing compound metabolic process;GO:0044271//cellular nitrogen compound biosynthetic process;GO:0046483//heterocycle metabolic process;GO:0097659//nucleic acid-templated transcription;GO:0065007//biological regulation;GO:0006725//cellular aromatic comp…	XP_015054988.1|7.6e-44|PREDICTED: NAC domain-containing protein 100-like [Solanum pennellii]
Solyc12g096720.2	2.02131	1.59282e-16	K04733//interleukin-1 receptor-associated kinase 4 [EC:2.7.11.1]	GO:0016773//phosphotransferase activity, alcohol group as acceptor;GO:0043167//ion binding;GO:0016740//transferase activity;GO:0035639//purine ribonucleoside triphosphate binding;GO:1901265//nucleoside phosphate binding;GO:0043168//anion binding;GO:0016772//transferase activity, transferring phosphorus-containing groups;GO:0004672//protein kinase activity;GO:0030554//adenyl nucleotide binding;GO:…	XP_010314859.1|3.1e-105|PREDICTED: probably inactive leucine-rich repeat receptor-like protein kinase At5g48380 [Solanum lycopersicum]
Solyc02g061780.3	2.02131	0.000292629	K00521//ferric-chelate reductase [EC:1.16.1.7];K13126//polyadenylate-binding protein+ko03015//mRNA surveillance pathway+ko03018//RNA degradation+ko03013//RNA transport	GO:0009058//biosynthetic process;GO:1901362//organic cyclic compound biosynthetic process;GO:0031326//regulation of cellular biosynthetic process;GO:0065007//biological regulation;GO:0071704//organic substance metabolic process;GO:0090304//nucleic acid metabolic process;GO:0010468//regulation of gene expression;GO:0019219//regulation of nucleobase-containing compound metabolic process;GO:0009987/…	XP_010317253.1|3.1e-141|PREDICTED: NAC domain-containing protein 35-like [Solanum lycopersicum]
Solyc01g010080.3	2.01939	4.10417e-12	K21867//potassium channel	GO:0016021//integral component of membrane;GO:0044425//membrane part;GO:0031224//intrinsic component of membrane;GO:0016020//membrane;GO:0022836//gated channel activity;GO:0015079//potassium ion transmembrane transporter activity;GO:0005215//transporter activity;GO:0005261//cation channel activity;GO:0008324//cation transmembrane transporter activity;GO:0098782//mechanosensitived potassium channe…	XP_015070561.1|0.0e+00|PREDICTED: potassium channel KAT3-like [Solanum pennellii]
Solyc06g068960.1	2.01856	0	K13448//calcium-binding protein CML+ko04626//Plant-pathogen interaction	GO:0005488//binding;GO:0043169//cation binding;GO:0005509//calcium ion binding;GO:0043167//ion binding;GO:0046872//metal ion binding;	XP_004241666.2|3.9e-85|PREDICTED: calcium-binding allergen Ole e 8-like [Solanum lycopersicum]
Solyc02g083850.3	2.01198	2.03607e-95	K13412//calcium-dependent protein kinase [EC:2.7.11.1]+ko04626//Plant-pathogen interaction	GO:0009719//response to endogenous stimulus;GO:0050794//regulation of cellular process;GO:0042221//response to chemical;GO:1901700//response to oxygen-containing compound;GO:0071215//cellular response to abscisic acid stimulus;GO:0065007//biological regulation;GO:0006807//nitrogen compound metabolic process;GO:0043412//macromolecule modification;GO:0044237//cellular metabolic process;GO:0044238//…	XP_004232492.1|0.0e+00|PREDICTED: calcium-dependent protein kinase 18-like [Solanum lycopersicum]
Solyc10g055820.2	2.00924	4.53286e-05	K20547//basic endochitinase B [EC:3.2.1.14]+ko04016//MAPK signaling pathway - plant+ko00520//Amino sugar and nucleotide sugar metabolism+ko01100//Metabolic pathways	GO:0044036//cell wall macromolecule metabolic process;GO:1901565//organonitrogen compound catabolic process;GO:0006030//chitin metabolic process;GO:0009057//macromolecule catabolic process;GO:0009056//catabolic process;GO:0044238//primary metabolic process;GO:0006807//nitrogen compound metabolic process;GO:0071554//cell wall organization or biogenesis;GO:1901072//glucosamine-containing compound c…	XP_004248635.1|2.1e-204|PREDICTED: endochitinase 3-like [Solanum lycopersicum]
Solyc03g111300.1	2.00819	7.42264e-38	K20665//jasmonoyl-L-amino acid 12-hydroxylase [EC:1.14.14.48]	GO:0046914//transition metal ion binding;GO:0046906//tetrapyrrole binding;GO:0048037//cofactor binding;GO:0043169//cation binding;GO:0043167//ion binding;GO:0016491//oxidoreductase activity;GO:0005506//iron ion binding;GO:0016705//oxidoreductase activity, acting on paired donors, with incorporation or reduction of molecular oxygen;GO:0097159//organic cyclic compound binding;GO:0046872//metal ion …	XP_004236332.1|2.7e-289|PREDICTED: cytochrome P450 94B3-like [Solanum lycopersicum]
Solyc04g014900.3	2.00736	1.54804e-50	K13420//LRR receptor-like serine/threonine-protein kinase FLS2 [EC:2.7.11.1]+ko04016//MAPK signaling pathway - plant+ko04626//Plant-pathogen interaction	GO:0031224//intrinsic component of membrane;GO:0044425//membrane part;GO:0016020//membrane;GO:0016021//integral component of membrane;GO:0016740//transferase activity;GO:0032553//ribonucleotide binding;GO:0097367//carbohydrate derivative binding;GO:0017076//purine nucleotide binding;GO:0016773//phosphotransferase activity, alcohol group as acceptor;GO:0004672//protein kinase activity;GO:0140096//…	XP_010319224.1|1.1e-307|PREDICTED: receptor kinase-like protein Xa21 [Solanum lycopersicum]
Solyc01g067020.3	2.00626	1.90082e-99	K04733//interleukin-1 receptor-associated kinase 4 [EC:2.7.11.1]	GO:0031224//intrinsic component of membrane;GO:0016021//integral component of membrane;GO:0016020//membrane;GO:0044425//membrane part;GO:0016740//transferase activity;GO:0030554//adenyl nucleotide binding;GO:0036094//small molecule binding;GO:1901363//heterocyclic compound binding;GO:0032553//ribonucleotide binding;GO:0043167//ion binding;GO:1901265//nucleoside phosphate binding;GO:0017076//purin…	NP_001234580.2|0.0e+00|atypical receptor-like kinase 1 precursor [Solanum lycopersicum]
Solyc11g005630.1	1.99847	0	K04733//interleukin-1 receptor-associated kinase 4 [EC:2.7.11.1]	GO:0019538//protein metabolic process;GO:0044260//cellular macromolecule metabolic process;GO:0043170//macromolecule metabolic process;GO:0000003//reproduction;GO:0022414//reproductive process;GO:0036211//protein modification process;GO:1901564//organonitrogen compound metabolic process;GO:0007154//cell communication;GO:0071704//organic substance metabolic process;GO:0043412//macromolecule modifi…	XP_004249884.1|0.0e+00|PREDICTED: G-type lectin S-receptor-like serine/threonine-protein kinase LECRK3 [Solanum lycopersicum]
Solyc04g080820.2	1.99084	0	K00279//cytokinin dehydrogenase [EC:1.5.99.12]+ko00908//Zeatin biosynthesis	GO:0006725//cellular aromatic compound metabolic process;GO:0009987//cellular process;GO:0006807//nitrogen compound metabolic process;GO:0046483//heterocycle metabolic process;GO:0071704//organic substance metabolic process;GO:0009690//cytokinin metabolic process;GO:0065007//biological regulation;GO:0008152//metabolic process;GO:0034754//cellular hormone metabolic process;GO:0044237//cellular met…	NP_001266251.1|7.2e-309|cytokinin oxidase/dehydrogenase-like precursor [Solanum lycopersicum]
Solyc04g072000.3	1.98647	7.25117e-118	K01183//chitinase [EC:3.2.1.14]+ko00520//Amino sugar and nucleotide sugar metabolism+ko01100//Metabolic pathways	GO:0046348//amino sugar catabolic process;GO:0006807//nitrogen compound metabolic process;GO:1901136//carbohydrate derivative catabolic process;GO:0006030//chitin metabolic process;GO:0006026//aminoglycan catabolic process;GO:0044238//primary metabolic process;GO:0043170//macromolecule metabolic process;GO:0071704//organic substance metabolic process;GO:0006040//amino sugar metabolic process;GO:1…	XP_004237833.1|8.7e-169|PREDICTED: endochitinase EP3 [Solanum lycopersicum]
Solyc02g078660.3	1.98338	2.20573e-63	K02184//formin 2;K05747//Wiskott-Aldrich syndrome protein+ko04144//Endocytosis	GO:0009658//chloroplast organization;GO:0009657//plastid organization;GO:0006996//organelle organization;GO:0009987//cellular process;GO:0071840//cellular component organization or biogenesis;GO:0016043//cellular component organization;GO:0044434//chloroplast part;GO:0009707//chloroplast outer membrane;GO:0009941//chloroplast envelope;GO:0031969//chloroplast membrane;GO:0044435//plastid part;GO:0…	XP_010316722.1|0.0e+00|PREDICTED: uncharacterized protein At4g04980 [Solanum lycopersicum]
Solyc08g036660.3	1.98283	1.99508e-37	K13464//jasmonate ZIM domain-containing protein+ko04075//Plant hormone signal transduction	GO:0010646//regulation of cell communication;GO:1903506//regulation of nucleic acid-templated transcription;GO:0048523//negative regulation of cellular process;GO:0050789//regulation of biological process;GO:0031326//regulation of cellular biosynthetic process;GO:0051252//regulation of RNA metabolic process;GO:0080134//regulation of response to stress;GO:0048519//negative regulation of biological…	XP_004244921.1|9.0e-66|PREDICTED: protein TIFY 5A-like [Solanum lycopersicum]
Solyc02g079533.1	1.98067	3.62306e-06	K04733//interleukin-1 receptor-associated kinase 4 [EC:2.7.11.1]	GO:0071704//organic substance metabolic process;GO:0044706//multi-multicellular organism process;GO:0009875//pollen-pistil interaction;GO:0006793//phosphorus metabolic process;GO:0007154//cell communication;GO:0032501//multicellular organismal process;GO:0006464//cellular protein modification process;GO:0022414//reproductive process;GO:0048544//recognition of pollen;GO:0043170//macromolecule meta…	XP_019067879.1|0.0e+00|PREDICTED: G-type lectin S-receptor-like serine/threonine-protein kinase At1g11330 [Solanum lycopersicum]
Solyc01g109710.3	1.97441	7.93365e-196		GO:0050896//response to stimulus;GO:0006950//response to stress;GO:0016020//membrane;GO:0005623//cell;GO:0044464//cell part;GO:0005886//plasma membrane;GO:0071944//cell periphery;	NP_001315571.1|5.9e-95|protein response to dessication 2 [Solanum lycopersicum]
Solyc02g086540.2	1.97173	7.93592e-05	K06670//cohesin complex subunit SCC1	GO:0044425//membrane part;GO:0031224//intrinsic component of membrane;GO:0016021//integral component of membrane;GO:0016020//membrane;GO:0016757//transferase activity, transferring glycosyl groups;GO:0016758//transferase activity, transferring hexosyl groups;GO:0008194//UDP-glycosyltransferase activity;GO:0016740//transferase activity;GO:0003824//catalytic activity;GO:0008375//acetylglucosaminylt…	XP_015064886.1|7.4e-213|PREDICTED: sister chromatid cohesion 1 protein 3-like [Solanum pennellii]
Solyc02g070890.3	1.97023	3.55077e-198	K13420//LRR receptor-like serine/threonine-protein kinase FLS2 [EC:2.7.11.1]+ko04016//MAPK signaling pathway - plant+ko04626//Plant-pathogen interaction	GO:0044425//membrane part;GO:0031224//intrinsic component of membrane;GO:0016020//membrane;GO:0016021//integral component of membrane;GO:0005524//ATP binding;GO:0035639//purine ribonucleoside triphosphate binding;GO:1901265//nucleoside phosphate binding;GO:0030554//adenyl nucleotide binding;GO:0097367//carbohydrate derivative binding;GO:0032553//ribonucleotide binding;GO:0140096//catalytic activi…	XP_004233092.1|0.0e+00|PREDICTED: LRR receptor-like serine/threonine-protein kinase FLS2 [Solanum lycopersicum]
Solyc04g054950.3	1.9688	4.14747e-35	K08081//tropinone reductase I [EC:1.1.1.206]+ko00960//Tropane, piperidine and pyridine alkaloid biosynthesis+ko01100//Metabolic pathways+ko01110//Biosynthesis of secondary metabolites	GO:0016021//integral component of membrane;GO:0044425//membrane part;GO:0016020//membrane;GO:0031224//intrinsic component of membrane;GO:0016491//oxidoreductase activity;GO:0003824//catalytic activity;	XP_004237405.1|1.1e-148|PREDICTED: tropinone reductase homolog [Solanum lycopersicum]
Solyc06g074710.1	1.96617	0.000190199	K13065//shikimate O-hydroxycinnamoyltransferase [EC:2.3.1.133]+ko01100//Metabolic pathways+ko01110//Biosynthesis of secondary metabolites+ko00940//Phenylpropanoid biosynthesis+ko00941//Flavonoid biosynthesis+ko00945//Stilbenoid, diarylheptanoid and gingerol biosynthesis	GO:0016740//transferase activity;GO:0016746//transferase activity, transferring acyl groups;GO:0003824//catalytic activity;GO:0016747//transferase activity, transferring acyl groups other than amino-acyl groups;	XP_004241296.1|1.1e-262|PREDICTED: agmatine coumaroyltransferase-2-like [Solanum lycopersicum]
Solyc03g082470.3	1.95641	1.29761e-09	K13420//LRR receptor-like serine/threonine-protein kinase FLS2 [EC:2.7.11.1]+ko04016//MAPK signaling pathway - plant+ko04626//Plant-pathogen interaction	GO:0031224//intrinsic component of membrane;GO:0044425//membrane part;GO:0016020//membrane;GO:0016021//integral component of membrane;GO:0032555//purine ribonucleotide binding;GO:0004672//protein kinase activity;GO:0004674//protein serine/threonine kinase activity;GO:0016740//transferase activity;GO:0016772//transferase activity, transferring phosphorus-containing groups;GO:0140096//catalytic act…	XP_004235118.1|0.0e+00|PREDICTED: leucine-rich repeat receptor-like protein kinase PEPR1 [Solanum lycopersicum]
Solyc05g007410.1	1.95534	0.00011047			XP_015076264.1|1.5e-37|PREDICTED: extensin-like [Solanum pennellii]
Solyc07g008620.1	1.95246	7.8429e-71	K13466//EIX receptor 1/2+ko04626//Plant-pathogen interaction;K19613//leucine-rich repeat protein SHOC2	GO:0044425//membrane part;GO:0016020//membrane;GO:0031224//intrinsic component of membrane;GO:0016021//integral component of membrane;GO:0016772//transferase activity, transferring phosphorus-containing groups;GO:0016301//kinase activity;GO:0003824//catalytic activity;GO:0016740//transferase activity;	NP_001234427.1|0.0e+00|EIX receptor 1 precursor [Solanum lycopersicum]
Solyc04g009860.3	1.93758	3.22329e-108	K13229//2,4-dihydroxy-1,4-benzoxazin-3-one-glucoside dioxygenase [EC:1.14.11.59]+ko00402//Benzoxazinoid biosynthesis;K06892//feruloyl-CoA ortho-hydroxylase [EC:1.14.11.-]+ko01110//Biosynthesis of secondary metabolites+ko00940//Phenylpropanoid biosynthesis	GO:0043167//ion binding;GO:0046872//metal ion binding;GO:0043169//cation binding;GO:0005488//binding;GO:0003824//catalytic activity;GO:0016491//oxidoreductase activity;	XP_004236794.1|1.0e-200|PREDICTED: 1-aminocyclopropane-1-carboxylate oxidase homolog 1 [Solanum lycopersicum]
Solyc04g082570.3	1.93521	4.5764e-273	K08332//vacuolar protein 8	GO:0016740//transferase activity;GO:0140096//catalytic activity, acting on a protein;GO:0003824//catalytic activity;GO:0019787//ubiquitin-like protein transferase activity;GO:0004842//ubiquitin-protein transferase activity;	XP_016568243.1|0.0e+00|PREDICTED: U-box domain-containing protein 44-like [Capsicum annuum]
Solyc04g079420.3	1.93218	0	K19613//leucine-rich repeat protein SHOC2;K13457//disease resistance protein RPM1+ko04626//Plant-pathogen interaction	GO:0006950//response to stress;GO:0007165//signal transduction;GO:0065007//biological regulation;GO:0051716//cellular response to stimulus;GO:0007154//cell communication;GO:0050896//response to stimulus;GO:0009987//cellular process;GO:0006952//defense response;GO:0050789//regulation of biological process;GO:0023052//signaling;GO:0050794//regulation of cellular process;GO:0016020//membrane;GO:0071…	XP_004238189.1|0.0e+00|PREDICTED: probable disease resistance protein At4g33300 [Solanum lycopersicum]
Solyc01g103630.3	1.92203	4.874e-12	K14611//solute carrier family 23 (nucleobase transporter), member 1/2		XP_004231328.1|2.6e-76|PREDICTED: uncharacterized protein LOC101258312 [Solanum lycopersicum]
Solyc02g014860.3	1.91704	0	K12859//U5 snRNP protein, DIM1 family+ko03040//Spliceosome	GO:0009536//plastid;GO:0044425//membrane part;GO:0016020//membrane;GO:0031224//intrinsic component of membrane;GO:0016021//integral component of membrane;GO:0005622//intracellular;GO:0043231//intracellular membrane-bounded organelle;GO:0043227//membrane-bounded organelle;GO:0043226//organelle;GO:0044424//intracellular part;GO:0005737//cytoplasm;GO:0044464//cell part;GO:0005623//cell;GO:0009507//c…	XP_004231500.1|1.4e-265|PREDICTED: uncharacterized protein LOC101265380 [Solanum lycopersicum]
Solyc03g123860.3	1.91514	2.69798e-106	K17422//large subunit ribosomal protein L41;K13420//LRR receptor-like serine/threonine-protein kinase FLS2 [EC:2.7.11.1]+ko04016//MAPK signaling pathway - plant+ko04626//Plant-pathogen interaction	GO:0031224//intrinsic component of membrane;GO:0016020//membrane;GO:0016021//integral component of membrane;GO:0044425//membrane part;GO:0005524//ATP binding;GO:0004672//protein kinase activity;GO:0032559//adenyl ribonucleotide binding;GO:0097367//carbohydrate derivative binding;GO:0003824//catalytic activity;GO:0035639//purine ribonucleoside triphosphate binding;GO:0016772//transferase activity,…	XP_004235511.1|0.0e+00|PREDICTED: receptor-like protein kinase [Solanum lycopersicum]
Solyc08g059710.3	1.90836	2.51297e-11			XP_004245019.1|0.0e+00|PREDICTED: uncharacterized protein LOC101256695 [Solanum lycopersicum]
Solyc08g036620.3	1.90685	2.63612e-17	K13464//jasmonate ZIM domain-containing protein+ko04075//Plant hormone signal transduction	GO:0050896//response to stimulus;GO:0051252//regulation of RNA metabolic process;GO:0009611//response to wounding;GO:0006950//response to stress;GO:0031327//negative regulation of cellular biosynthetic process;GO:0031324//negative regulation of cellular metabolic process;GO:0048519//negative regulation of biological process;GO:0045934//negative regulation of nucleobase-containing compound metabol…	XP_004244919.1|1.3e-50|PREDICTED: protein TIFY 5A-like [Solanum lycopersicum]
Solyc05g008980.2	1.89784	4.59039e-59	K04733//interleukin-1 receptor-associated kinase 4 [EC:2.7.11.1]	GO:0007165//signal transduction;GO:0007166//cell surface receptor signaling pathway;GO:0050789//regulation of biological process;GO:0009987//cellular process;GO:0051716//cellular response to stimulus;GO:0065007//biological regulation;GO:0050896//response to stimulus;GO:0050794//regulation of cellular process;GO:0007154//cell communication;GO:0023052//signaling;GO:0005623//cell;GO:0031224//intrins…	XP_004239409.1|0.0e+00|PREDICTED: LEAF RUST 10 DISEASE-RESISTANCE LOCUS RECEPTOR-LIKE PROTEIN KINASE-like 1.1 [Solanum lycopersicum]
Solyc07g039420.1	1.89363	3.86176e-08	K13457//disease resistance protein RPM1+ko04626//Plant-pathogen interaction	GO:0051716//cellular response to stimulus;GO:0007154//cell communication;GO:0065007//biological regulation;GO:0050794//regulation of cellular process;GO:0023052//signaling;GO:0006952//defense response;GO:0009987//cellular process;GO:0050896//response to stimulus;GO:0006950//response to stress;GO:0050789//regulation of biological process;GO:0007165//signal transduction;GO:0005623//cell;GO:0044464/…	XP_015169822.1|1.1e-137|PREDICTED: disease resistance protein RPP13-like [Solanum tuberosum]
Solyc01g073890.3	1.87922	1.08428e-16	K03283//heat shock 70kDa protein 1/2/6/8+ko03040//Spliceosome+ko04144//Endocytosis+ko04141//Protein processing in endoplasmic reticulum;K17609//nucleoredoxin [EC:1.8.1.8]	GO:0044464//cell part;GO:0005622//intracellular;GO:0005623//cell;GO:0005737//cytoplasm;GO:0044424//intracellular part;GO:0016651//oxidoreductase activity, acting on NAD(P)H;GO:0003824//catalytic activity;GO:0016667//oxidoreductase activity, acting on a sulfur group of donors;GO:0016491//oxidoreductase activity;GO:0004791//thioredoxin-disulfide reductase activity;GO:0016668//oxidoreductase activit…	XP_004229346.1|9.7e-231|PREDICTED: uncharacterized protein LOC101250152 [Solanum lycopersicum]
Solyc01g108440.2	1.87819	1.86097e-31			XP_010315267.1|7.7e-184|PREDICTED: uncharacterized protein DDB_G0271670-like [Solanum lycopersicum]
Solyc12g045030.2	1.87779	0	K00059//3-oxoacyl-[acyl-carrier protein] reductase [EC:1.1.1.100]+ko01100//Metabolic pathways+ko00061//Fatty acid biosynthesis+ko01212//Fatty acid metabolism+ko00780//Biotin metabolism	GO:0003824//catalytic activity;GO:0016491//oxidoreductase activity;	XP_010314314.1|1.1e-149|PREDICTED: uncharacterized protein LOC101255178 [Solanum lycopersicum]
Solyc11g011340.2	1.87331	2.18336e-07	K00083//cinnamyl-alcohol dehydrogenase [EC:1.1.1.195]+ko01100//Metabolic pathways+ko01110//Biosynthesis of secondary metabolites+ko00940//Phenylpropanoid biosynthesis	GO:0043169//cation binding;GO:0008270//zinc ion binding;GO:0043167//ion binding;GO:0003824//catalytic activity;GO:0046872//metal ion binding;GO:0005488//binding;GO:0046914//transition metal ion binding;GO:0016491//oxidoreductase activity;	NP_001304266.1|1.6e-209|8-hydroxygeraniol dehydrogenase [Solanum lycopersicum]
Solyc02g070110.1	1.87175	5.67693e-07	K22395//cinnamyl-alcohol dehydrogenase [EC:1.1.1.195]+ko01100//Metabolic pathways+ko01110//Biosynthesis of secondary metabolites+ko00940//Phenylpropanoid biosynthesis	GO:0043167//ion binding;GO:0016491//oxidoreductase activity;GO:0036094//small molecule binding;GO:0005488//binding;GO:0016614//oxidoreductase activity, acting on CH-OH group of donors;GO:0050660//flavin adenine dinucleotide binding;GO:0000166//nucleotide binding;GO:1901265//nucleoside phosphate binding;GO:0003824//catalytic activity;GO:0097159//organic cyclic compound binding;GO:0050662//coenzyme…	XP_004233882.2|0.0e+00|PREDICTED: cannabidiolic acid synthase-like [Solanum lycopersicum]
Solyc02g076650.1	1.87174	2.07781e-23		GO:0034654//nucleobase-containing compound biosynthetic process;GO:0044249//cellular biosynthetic process;GO:0009058//biosynthetic process;GO:0009059//macromolecule biosynthetic process;GO:0016070//RNA metabolic process;GO:0044271//cellular nitrogen compound biosynthetic process;GO:0044260//cellular macromolecule metabolic process;GO:1901360//organic cyclic compound metabolic process;GO:0010467//…	XP_010316825.1|4.1e-16|PREDICTED: transcription factor TGA2.3 [Solanum lycopersicum]
Solyc06g059740.3	1.86323	2.23228e-63	K18857//alcohol dehydrogenase class-P [EC:1.1.1.1]+ko00010//Glycolysis / Gluconeogenesis+ko00350//Tyrosine metabolism+ko00592//alpha-Linolenic acid metabolism+ko01100//Metabolic pathways+ko01110//Biosynthesis of secondary metabolites+ko00071//Fatty acid degradation	GO:0044464//cell part;GO:0005622//intracellular;GO:0005623//cell;GO:0044424//intracellular part;GO:0005737//cytoplasm;GO:0005488//binding;GO:0003824//catalytic activity;GO:0016616//oxidoreductase activity, acting on the CH-OH group of donors, NAD or NADP as acceptor;GO:0043169//cation binding;GO:0046872//metal ion binding;GO:0043167//ion binding;GO:0016491//oxidoreductase activity;GO:0016614//oxi…	NP_001234099.1|7.0e-220|alcohol dehydrogenase 2 [Solanum lycopersicum]
Solyc02g083523.1	1.85292	1.0241e-08		GO:0050896//response to stimulus;GO:0006950//response to stress;	XP_009771076.1|3.2e-13|PREDICTED: uncharacterized protein LOC104221668 [Nicotiana sylvestris]
Solyc09g011870.2	1.85139	1.8205e-08	K15227//arogenate dehydrogenase (NADP+), plant [EC:1.3.1.78]+ko01230//Biosynthesis of amino acids+ko01100//Metabolic pathways+ko01110//Biosynthesis of secondary metabolites+ko00400//Phenylalanine, tyrosine and tryptophan biosynthesis	GO:0009073//aromatic amino acid family biosynthetic process;GO:0006082//organic acid metabolic process;GO:0008652//cellular amino acid biosynthetic process;GO:0009058//biosynthetic process;GO:0006520//cellular amino acid metabolic process;GO:1901605//alpha-amino acid metabolic process;GO:0046394//carboxylic acid biosynthetic process;GO:0019752//carboxylic acid metabolic process;GO:1901360//organi…	NP_001310389.1|2.5e-202|arogenate dehydrogenase 2, chloroplastic-like [Solanum pennellii]
Solyc09g090730.2	1.85057	6.35162e-86	K03320//ammonium transporter, Amt family	GO:0015695//organic cation transport;GO:0071702//organic substance transport;GO:0071705//nitrogen compound transport;GO:0034220//ion transmembrane transport;GO:0098655//cation transmembrane transport;GO:0072488//ammonium transmembrane transport;GO:0015696//ammonium transport;GO:0006812//cation transport;GO:0051179//localization;GO:0006811//ion transport;GO:0055085//transmembrane transport;GO:0006…	NP_001304667.1|2.3e-293|ammonium transporter 1 member 1 [Solanum lycopersicum]
Solyc07g056200.3	1.84558	1.0558e-32	K04733//interleukin-1 receptor-associated kinase 4 [EC:2.7.11.1];K13459//disease resistance protein RPS2+ko04626//Plant-pathogen interaction;K19307//25S rRNA (uracil2634-N3)-methyltransferase [EC:2.1.1.313]	GO:0098771//inorganic ion homeostasis;GO:0009987//cellular process;GO:0055082//cellular chemical homeostasis;GO:0006811//ion transport;GO:0006875//cellular metal ion homeostasis;GO:0030003//cellular cation homeostasis;GO:0055076//transition metal ion homeostasis;GO:0048878//chemical homeostasis;GO:0051179//localization;GO:0055080//cation homeostasis;GO:0019725//cellular homeostasis;GO:0065007//bi…	XP_004243215.1|7.8e-66|PREDICTED: uncharacterized protein LOC101251005 [Solanum lycopersicum]
Solyc03g013160.3	1.84532	1.14276e-171	K15015//solute carrier family 32 (vesicular inhibitory amino acid transporter)	GO:0015711//organic anion transport;GO:0003333//amino acid transmembrane transport;GO:0006811//ion transport;GO:0051179//localization;GO:0006810//transport;GO:0071705//nitrogen compound transport;GO:1903825//organic acid transmembrane transport;GO:0015849//organic acid transport;GO:0051234//establishment of localization;GO:0006820//anion transport;GO:1905039//carboxylic acid transmembrane transpo…	XP_016571649.1|9.3e-199|PREDICTED: vacuolar amino acid transporter 1-like isoform X1 [Capsicum annuum]
Solyc03g083620.1	1.84179	3.45874e-176	K01051//pectinesterase [EC:3.1.1.11]+ko00040//Pentose and glucuronate interconversions+ko01100//Metabolic pathways	GO:0030234//enzyme regulator activity;GO:0098772//molecular function regulator;GO:0004857//enzyme inhibitor activity;	XP_004234937.1|2.6e-60|PREDICTED: 21 kDa protein [Solanum lycopersicum]
Solyc07g042540.3	1.83605	1.34833e-05
Solyc02g063250.3	1.83372	5.02214e-14	K07304//peptide-methionine (S)-S-oxide reductase [EC:1.8.4.11]	GO:0003824//catalytic activity;GO:0016491//oxidoreductase activity;GO:0016667//oxidoreductase activity, acting on a sulfur group of donors;GO:0008113//peptide-methionine (S)-S-oxide reductase activity;GO:0016671//oxidoreductase activity, acting on a sulfur group of donors, disulfide as acceptor;	XP_004233487.1|6.4e-151|PREDICTED: peptide methionine sulfoxide reductase isoform X1 [Solanum lycopersicum]
Solyc07g017733.1	1.82867	0.00070662			XP_010312407.1|1.3e-22|PREDICTED: uncharacterized protein LOC104644427 [Solanum lycopersicum]
Solyc01g107400.2	1.82224	3.56152e-06	K14487//auxin responsive GH3 gene family+ko04075//Plant hormone signal transduction		XP_009617606.1|3.4e-14|PREDICTED: probable indole-3-acetic acid-amido synthetase GH3.1 [Nicotiana tomentosiformis]
Solyc07g043230.3	1.81898	2.35524e-153	K14709//solute carrier family 39 (zinc transporter), member 1/2/3	GO:0030001//metal ion transport;GO:0098660//inorganic ion transmembrane transport;GO:0098655//cation transmembrane transport;GO:0051179//localization;GO:0000041//transition metal ion transport;GO:0055085//transmembrane transport;GO:0006810//transport;GO:0072511//divalent inorganic cation transport;GO:0051234//establishment of localization;GO:0006829//zinc ion transport;GO:0070838//divalent metal …	XP_004243649.1|1.9e-190|PREDICTED: zinc transporter 5-like [Solanum lycopersicum]
Solyc06g075320.3	1.81532	8.22397e-05	K17815//exonuclease V [EC:3.1.-.-];K18626//trichohyalin	GO:0045735//nutrient reservoir activity;	XP_004241268.1|2.4e-268|PREDICTED: vicilin-like seed storage protein At2g28490 [Solanum lycopersicum]
Solyc05g053180.3	1.81107	9.60712e-117			XP_009760182.1|5.3e-30|PREDICTED: uncharacterized protein LOC104212579 [Nicotiana sylvestris]
Solyc00g170200.1	1.81042	1.75573e-173			XP_004253481.2|4.6e-68|PREDICTED: strigolactone esterase D14 [Solanum lycopersicum]
Solyc11g020330.1	1.79625	4.9647e-05	K13993//HSP20 family protein+ko04141//Protein processing in endoplasmic reticulum	GO:0009628//response to abiotic stimulus;GO:0006950//response to stress;GO:0050896//response to stimulus;GO:0009266//response to temperature stimulus;GO:0009408//response to heat;GO:0043227//membrane-bounded organelle;GO:0043226//organelle;GO:0005783//endoplasmic reticulum;GO:0005737//cytoplasm;GO:0005622//intracellular;GO:0043229//intracellular organelle;GO:0005623//cell;GO:0043231//intracellula…	NP_001234600.2|2.1e-101|small heat shock protein precursor [Solanum lycopersicum]
Solyc11g045515.1	1.79094	3.35114e-05			XP_010313120.1|2.2e-21|PREDICTED: uncharacterized protein LOC101261879 isoform X1 [Solanum lycopersicum]
Solyc06g063210.3	1.7868	9.58335e-33	K05387//glutamate receptor, ionotropic, plant	GO:0016020//membrane;GO:0044425//membrane part;GO:0031224//intrinsic component of membrane;GO:0016021//integral component of membrane;GO:0005216//ion channel activity;GO:0004888//transmembrane signaling receptor activity;GO:0022803//passive transmembrane transporter activity;GO:0022824//transmitter-gated ion channel activity;GO:0022839//ion gated channel activity;GO:0015276//ligand-gated ion chan…	XP_010322804.1|0.0e+00|PREDICTED: glutamate receptor 2.8 [Solanum lycopersicum]
Solyc12g009780.1	1.7865	1.76746e-16	K13420//LRR receptor-like serine/threonine-protein kinase FLS2 [EC:2.7.11.1]+ko04016//MAPK signaling pathway - plant+ko04626//Plant-pathogen interaction	GO:0044425//membrane part;GO:0016020//membrane;GO:0016021//integral component of membrane;GO:0031224//intrinsic component of membrane;	XP_010313802.1|0.0e+00|PREDICTED: receptor like protein 30-like [Solanum lycopersicum]
Solyc08g077900.3	1.7849	1.90308e-19	K20628//expansin	GO:0019953//sexual reproduction;GO:0000003//reproduction;GO:0022414//reproductive process;GO:0044703//multi-organism reproductive process;GO:0051704//multi-organism process;GO:0005576//extracellular region;	XP_004245823.1|8.5e-152|PREDICTED: expansin-like B1 [Solanum lycopersicum]
Solyc02g067600.1	1.78439	8.96703e-09			XP_011094155.2|5.4e-09|histone H3.v1-like [Sesamum indicum]
Solyc05g012430.1	1.78307	4.99847e-20	K13420//LRR receptor-like serine/threonine-protein kinase FLS2 [EC:2.7.11.1]+ko04016//MAPK signaling pathway - plant+ko04626//Plant-pathogen interaction	GO:0031224//intrinsic component of membrane;GO:0016021//integral component of membrane;GO:0044425//membrane part;GO:0016020//membrane;GO:0005488//binding;GO:0036094//small molecule binding;GO:0008144//drug binding;GO:0032559//adenyl ribonucleotide binding;GO:0000166//nucleotide binding;GO:1901363//heterocyclic compound binding;GO:0004672//protein kinase activity;GO:0097367//carbohydrate derivativ…	XP_006348807.2|6.7e-205|PREDICTED: probable leucine-rich repeat receptor-like protein kinase At1g35710 [Solanum tuberosum]
Solyc02g071620.3	1.7829	0	K00679//phospholipid:diacylglycerol acyltransferase [EC:2.3.1.158]+ko01100//Metabolic pathways+ko00561//Glycerolipid metabolism;K10691//E3 ubiquitin-protein ligase UBR4 [EC:2.3.2.27];K01188//beta-glucosidase [EC:3.2.1.21]+ko01100//Metabolic pathways+ko00500//Starch and sucrose metabolism+ko01110//Biosynthesis of secondary metabolites+ko00460//Cyanoamino acid metabolism+ko00940//Phenylpropanoid bi…	GO:0031224//intrinsic component of membrane;GO:0044425//membrane part;GO:0016021//integral component of membrane;GO:0016020//membrane;GO:0003824//catalytic activity;GO:0016788//hydrolase activity, acting on ester bonds;GO:0016787//hydrolase activity;	XP_004233002.1|4.6e-214|PREDICTED: GDSL esterase/lipase At1g29670-like [Solanum lycopersicum]
Solyc01g087785.1	1.77512	7.4007e-07		GO:0004252//serine-type endopeptidase activity;GO:0140096//catalytic activity, acting on a protein;GO:0070011//peptidase activity, acting on L-amino acid peptides;GO:0008233//peptidase activity;GO:0004175//endopeptidase activity;GO:0016787//hydrolase activity;GO:0003824//catalytic activity;GO:0017171//serine hydrolase activity;GO:0008236//serine-type peptidase activity;	XP_019231430.1|1.4e-13|PREDICTED: subtilisin-like protease SBT1.9 [Nicotiana attenuata]
Solyc11g005240.1	1.76308	7.53862e-05	K13091//RNA-binding protein 39	GO:0005488//binding;GO:0097159//organic cyclic compound binding;GO:0003676//nucleic acid binding;GO:1901363//heterocyclic compound binding;	XP_019066652.1|3.0e-244|PREDICTED: protein SENSITIVITY TO RED LIGHT REDUCED 1-like [Solanum lycopersicum]
Solyc10g083700.3	1.75771	1.73568e-05	K22983//cytochrome P450 family 76 subfamily A	GO:0008152//metabolic process;GO:0019748//secondary metabolic process;GO:0009058//biosynthetic process;GO:0044550//secondary metabolite biosynthetic process;GO:0031224//intrinsic component of membrane;GO:0016021//integral component of membrane;GO:0044425//membrane part;GO:0016020//membrane;GO:0016491//oxidoreductase activity;GO:0020037//heme binding;GO:0043167//ion binding;GO:0046872//metal ion b…	XP_004249463.1|2.2e-304|PREDICTED: cytochrome P450 76A2-like [Solanum lycopersicum]
Solyc01g099330.3	1.75615	9.07864e-18	K18195//rhamnogalacturonan endolyase [EC:4.2.2.23]	GO:0031224//intrinsic component of membrane;GO:0016020//membrane;GO:0044425//membrane part;GO:0016021//integral component of membrane;GO:0003824//catalytic activity;GO:0016740//transferase activity;GO:0016741//transferase activity, transferring one-carbon groups;GO:0008168//methyltransferase activity;	XP_004230216.1|5.8e-271|PREDICTED: uncharacterized protein LOC101247261 [Solanum lycopersicum]
Solyc11g006030.1	1.75521	1.58334e-29	K08332//vacuolar protein 8;K04733//interleukin-1 receptor-associated kinase 4 [EC:2.7.11.1];K10260//F-box and WD-40 domain protein 7+ko04120//Ubiquitin mediated proteolysis	GO:0004842//ubiquitin-protein transferase activity;GO:0016740//transferase activity;GO:0140096//catalytic activity, acting on a protein;GO:0019787//ubiquitin-like protein transferase activity;GO:0003824//catalytic activity;	XP_004250456.2|3.4e-248|PREDICTED: U-box domain-containing protein 21-like [Solanum lycopersicum]
Solyc02g090120.1	1.75467	5.25426e-06			XP_009789527.1|9.3e-20|PREDICTED: uncharacterized protein LOC104237137 [Nicotiana sylvestris]
Solyc08g036625.1	1.7503	7.3198e-10		GO:0048523//negative regulation of cellular process;GO:0010556//regulation of macromolecule biosynthetic process;GO:1902679//negative regulation of RNA biosynthetic process;GO:0023051//regulation of signaling;GO:0080090//regulation of primary metabolic process;GO:0031326//regulation of cellular biosynthetic process;GO:0080134//regulation of response to stress;GO:0031327//negative regulation of ce…	XP_019070752.1|1.0e-16|PREDICTED: uncharacterized protein LOC109120928, partial [Solanum lycopersicum]
Solyc05g050800.3	1.75019	0			NP_001297054.1|6.1e-143|phosphoglycerate mutase family protein [Solanum lycopersicum]
Solyc06g053715.1	1.75001	7.75255e-16
Solyc07g055690.1	1.7449	4.78209e-05	K04733//interleukin-1 receptor-associated kinase 4 [EC:2.7.11.1]	GO:0000003//reproduction;GO:0044706//multi-multicellular organism process;GO:0007154//cell communication;GO:0008037//cell recognition;GO:0048544//recognition of pollen;GO:0009856//pollination;GO:0051704//multi-organism process;GO:0032501//multicellular organismal process;GO:0009875//pollen-pistil interaction;GO:0022414//reproductive process;GO:0009987//cellular process;GO:0044425//membrane part;G…	XP_019070503.1|5.4e-265|PREDICTED: epidermis-specific secreted glycoprotein EP1-like [Solanum lycopersicum]
Solyc03g116890.3	1.74338	1.20449e-296	K13424//WRKY transcription factor 33+ko04016//MAPK signaling pathway - plant+ko04626//Plant-pathogen interaction	GO:0009620//response to fungus;GO:0080134//regulation of response to stress;GO:0034654//nucleobase-containing compound biosynthetic process;GO:2000112//regulation of cellular macromolecule biosynthetic process;GO:0031327//negative regulation of cellular biosynthetic process;GO:0009617//response to bacterium;GO:0051707//response to other organism;GO:0006807//nitrogen compound metabolic process;GO:…	NP_001303844.1|4.5e-197|probable WRKY transcription factor 40 [Solanum lycopersicum]
Solyc12g099400.2	1.74322	0		GO:0009507//chloroplast;GO:0044444//cytoplasmic part;GO:0005623//cell;GO:0043227//membrane-bounded organelle;GO:0043231//intracellular membrane-bounded organelle;GO:0044434//chloroplast part;GO:0044424//intracellular part;GO:0005829//cytosol;GO:0005622//intracellular;GO:0043226//organelle;GO:0044435//plastid part;GO:0043229//intracellular organelle;GO:0044446//intracellular organelle part;GO:0009…	XP_019067119.1|1.2e-177|PREDICTED: uncharacterized protein LOC101264805 [Solanum lycopersicum]
Solyc04g081290.3	1.74096	0	K22522//cytokinin riboside 5'-monophosphate phosphoribohydrolase [EC:3.2.2.-]	GO:0009058//biosynthetic process;GO:0046483//heterocycle metabolic process;GO:0044237//cellular metabolic process;GO:0010817//regulation of hormone levels;GO:0009987//cellular process;GO:0065007//biological regulation;GO:0006725//cellular aromatic compound metabolic process;GO:0008152//metabolic process;GO:0009308//amine metabolic process;GO:0006807//nitrogen compound metabolic process;GO:0042445…	NP_001311431.1|2.7e-124|cytokinin riboside 5'-monophosphate phosphoribohydrolase LOG1 [Solanum lycopersicum]
Solyc03g114710.3	1.73136	5.70235e-82	K13496//UDP-glucosyl transferase 73C [EC:2.4.1.-]	GO:0008152//metabolic process;GO:0016758//transferase activity, transferring hexosyl groups;GO:0016757//transferase activity, transferring glycosyl groups;GO:0003824//catalytic activity;GO:0016740//transferase activity;	XP_004236081.1|9.9e-281|PREDICTED: UDP-glycosyltransferase 89B2 [Solanum lycopersicum]
Solyc02g088987.1	1.73065	8.52435e-12			XP_016545560.1|3.9e-06|PREDICTED: glycine-rich protein 2-like [Capsicum annuum]
Solyc08g061323.1	1.72268	3.76136e-15	K19984//exocyst complex component 5;K10398//kinesin family member 11;K21437//ankyrin repeat domain-containing protein 13;K03283//heat shock 70kDa protein 1/2/6/8+ko03040//Spliceosome+ko04144//Endocytosis+ko04141//Protein processing in endoplasmic reticulum	GO:0003676//nucleic acid binding;GO:0005488//binding;GO:0005515//protein binding;GO:0003677//DNA binding;GO:0046983//protein dimerization activity;GO:0097159//organic cyclic compound binding;GO:1901363//heterocyclic compound binding;	XP_015081384.1|7.8e-161|PREDICTED: zinc finger BED domain-containing protein RICESLEEPER 2-like [Solanum pennellii]
Solyc09g074280.1	1.72112	1.23367e-10	K21440//ankyrin repeat domain-containing protein 50		XP_004247547.1|1.6e-264|PREDICTED: uncharacterized protein LOC101261854 [Solanum lycopersicum]
Solyc02g094180.3	1.72097	9.40329e-11	K00430//peroxidase [EC:1.11.1.7]+ko01100//Metabolic pathways+ko01110//Biosynthesis of secondary metabolites+ko00940//Phenylpropanoid biosynthesis	GO:0050896//response to stimulus;GO:0009056//catabolic process;GO:0044248//cellular catabolic process;GO:0017144//drug metabolic process;GO:0072593//reactive oxygen species metabolic process;GO:0006950//response to stress;GO:0006979//response to oxidative stress;GO:0009987//cellular process;GO:0008152//metabolic process;GO:0042744//hydrogen peroxide catabolic process;GO:0044237//cellular metaboli…	XP_016452635.1|8.0e-171|PREDICTED: peroxidase 55-like [Nicotiana tabacum]
Solyc03g033790.3	1.719	8.45566e-17	K08900//mitochondrial chaperone BCS1	GO:0005524//ATP binding;GO:0043167//ion binding;GO:0097367//carbohydrate derivative binding;GO:0008144//drug binding;GO:0032555//purine ribonucleotide binding;GO:0032553//ribonucleotide binding;GO:0036094//small molecule binding;GO:0032559//adenyl ribonucleotide binding;GO:0017076//purine nucleotide binding;GO:0097159//organic cyclic compound binding;GO:0030554//adenyl nucleotide binding;GO:19013…	XP_004234548.1|2.9e-240|PREDICTED: protein HYPER-SENSITIVITY-RELATED 4-like [Solanum lycopersicum]
Solyc07g008930.1	1.71619	2.78897e-10			XP_015170874.1|1.1e-108|PREDICTED: uncharacterized protein LOC107063476 [Solanum tuberosum]
Solyc07g061890.1	1.71418	1.10181e-28			XP_004244316.1|6.8e-105|PREDICTED: uncharacterized protein LOC101255221 [Solanum lycopersicum]
Solyc02g087210.3	1.7084	1.89725e-219		GO:0043167//ion binding;GO:0043169//cation binding;GO:0008270//zinc ion binding;GO:0046872//metal ion binding;GO:0046914//transition metal ion binding;GO:0005488//binding;	NP_001306921.1|3.0e-111|stress-associated protein 11 [Solanum lycopersicum]
Solyc01g067120.3	1.70723	1.65081e-78	K03347//cullin 1+ko04141//Protein processing in endoplasmic reticulum+ko04120//Ubiquitin mediated proteolysis		XP_010321252.1|1.3e-99|PREDICTED: cullin-1-like isoform X2 [Solanum lycopersicum]
Solyc02g080040.3	1.70548	1.28144e-106	K04733//interleukin-1 receptor-associated kinase 4 [EC:2.7.11.1]	GO:0016020//membrane;GO:0016021//integral component of membrane;GO:0031224//intrinsic component of membrane;GO:0044425//membrane part;GO:0016740//transferase activity;GO:1901363//heterocyclic compound binding;GO:0008144//drug binding;GO:0030554//adenyl nucleotide binding;GO:0016772//transferase activity, transferring phosphorus-containing groups;GO:0005488//binding;GO:0036094//small molecule bind…	XP_006365883.1|2.3e-224|PREDICTED: putative receptor-like protein kinase At4g00960 isoform X2 [Solanum tuberosum]
Solyc09g075870.2	1.70531	6.77638e-25	K15718//linoleate 9S-lipoxygenase [EC:1.13.11.58]+ko00591//Linoleic acid metabolism	GO:1901576//organic substance biosynthetic process;GO:0006082//organic acid metabolic process;GO:0032787//monocarboxylic acid metabolic process;GO:0016053//organic acid biosynthetic process;GO:0044255//cellular lipid metabolic process;GO:0044238//primary metabolic process;GO:0008152//metabolic process;GO:0006631//fatty acid metabolic process;GO:0019752//carboxylic acid metabolic process;GO:004428…	XP_004247367.1|0.0e+00|PREDICTED: probable linoleate 9S-lipoxygenase 5 [Solanum lycopersicum]
Solyc09g074890.1	1.70419	3.63639e-08		GO:0007165//signal transduction;GO:0048523//negative regulation of cellular process;GO:0099402//plant organ development;GO:0032501//multicellular organismal process;GO:0048731//system development;GO:0051716//cellular response to stimulus;GO:0007154//cell communication;GO:0050896//response to stimulus;GO:0023052//signaling;GO:0001558//regulation of cell growth;GO:0019722//calcium-mediated signalin…	XP_010326583.1|7.8e-62|PREDICTED: rapid alkalinization factor [Solanum lycopersicum]
Solyc01g109420.3	1.69581	2.08359e-12	K03809//NAD(P)H dehydrogenase (quinone) [EC:1.6.5.2]+ko00130//Ubiquinone and other terpenoid-quinone biosynthesis+ko01100//Metabolic pathways+ko01110//Biosynthesis of secondary metabolites	GO:0005737//cytoplasm;GO:0071944//cell periphery;GO:0044424//intracellular part;GO:0005623//cell;GO:0005622//intracellular;GO:0044464//cell part;GO:0016020//membrane;GO:0005886//plasma membrane;GO:0048037//cofactor binding;GO:0032553//ribonucleotide binding;GO:0010181//FMN binding;GO:0043167//ion binding;GO:0003955//NAD(P)H dehydrogenase (quinone) activity;GO:1901265//nucleoside phosphate binding…	XP_004230953.1|2.1e-144|PREDICTED: probable NAD(P)H dehydrogenase (quinone) FQR1-like 2 [Solanum lycopersicum]
Solyc08g029000.3	1.69567	1.66588e-23	K15718//linoleate 9S-lipoxygenase [EC:1.13.11.58]+ko00591//Linoleic acid metabolism	GO:0031408//oxylipin biosynthetic process;GO:0044283//small molecule biosynthetic process;GO:0006633//fatty acid biosynthetic process;GO:0071704//organic substance metabolic process;GO:0008152//metabolic process;GO:0008610//lipid biosynthetic process;GO:0072330//monocarboxylic acid biosynthetic process;GO:0044238//primary metabolic process;GO:0006631//fatty acid metabolic process;GO:0031407//oxyl…	XP_016578604.1|0.0e+00|PREDICTED: probable linoleate 9S-lipoxygenase 5 [Capsicum annuum]
Solyc10g008250.2	1.69437	4.3934e-11		GO:1903506//regulation of nucleic acid-templated transcription;GO:0010468//regulation of gene expression;GO:2001141//regulation of RNA biosynthetic process;GO:0031326//regulation of cellular biosynthetic process;GO:0060255//regulation of macromolecule metabolic process;GO:0050789//regulation of biological process;GO:0050794//regulation of cellular process;GO:0019222//regulation of metabolic proce…	XP_004248474.1|1.5e-129|PREDICTED: uncharacterized protein LOC101259680 [Solanum lycopersicum]
Solyc05g006220.3	1.69432	4.27774e-198	K14664//IAA-amino acid hydrolase [EC:3.5.1.-]		XP_019157918.1|4.2e-185|PREDICTED: IAA-amino acid hydrolase ILR1-like 4 [Ipomoea nil]
Solyc08g074980.3	1.68731	1.25081e-06	K04733//interleukin-1 receptor-associated kinase 4 [EC:2.7.11.1]	GO:0016310//phosphorylation;GO:0071704//organic substance metabolic process;GO:0007154//cell communication;GO:0050789//regulation of biological process;GO:0007166//cell surface receptor signaling pathway;GO:0043412//macromolecule modification;GO:1901564//organonitrogen compound metabolic process;GO:0006807//nitrogen compound metabolic process;GO:0006793//phosphorus metabolic process;GO:0008152//m…	XP_004246044.1|3.5e-246|PREDICTED: serine/threonine-protein kinase At5g01020 [Solanum lycopersicum]
Solyc04g071870.1	1.68428	1.14248e-168	K04733//interleukin-1 receptor-associated kinase 4 [EC:2.7.11.1]	GO:0031224//intrinsic component of membrane;GO:0044425//membrane part;GO:0016021//integral component of membrane;GO:0016020//membrane;GO:0036094//small molecule binding;GO:0097159//organic cyclic compound binding;GO:0097367//carbohydrate derivative binding;GO:0008144//drug binding;GO:0004674//protein serine/threonine kinase activity;GO:0032555//purine ribonucleotide binding;GO:0003824//catalytic …	XP_004237823.1|3.8e-219|PREDICTED: leucine-rich repeat receptor protein kinase EMS1 [Solanum lycopersicum]
Solyc06g009110.3	1.68289	2.72108e-152	K00924//kinase [EC:2.7.1.-]	GO:0004175//endopeptidase activity;GO:0004190//aspartic-type endopeptidase activity;GO:0016787//hydrolase activity;GO:0008233//peptidase activity;GO:0070011//peptidase activity, acting on L-amino acid peptides;GO:0003824//catalytic activity;GO:0070001//aspartic-type peptidase activity;GO:0140096//catalytic activity, acting on a protein;	XP_006355804.1|1.1e-238|PREDICTED: aspartic proteinase Asp1-like isoform X1 [Solanum tuberosum]
Solyc09g009985.1	1.67433	2.00568e-07	K13229//2,4-dihydroxy-1,4-benzoxazin-3-one-glucoside dioxygenase [EC:1.14.11.59]+ko00402//Benzoxazinoid biosynthesis;K06892//feruloyl-CoA ortho-hydroxylase [EC:1.14.11.-]+ko01110//Biosynthesis of secondary metabolites+ko00940//Phenylpropanoid biosynthesis	GO:0003824//catalytic activity;GO:0043169//cation binding;GO:0016491//oxidoreductase activity;GO:0043167//ion binding;GO:0005488//binding;GO:0046872//metal ion binding;	XP_004246497.1|7.9e-215|PREDICTED: 1-aminocyclopropane-1-carboxylate oxidase homolog 1 [Solanum lycopersicum]
Solyc03g079880.3	1.67273	5.48476e-21			NP_001306089.1|1.5e-59|xylem sap protein 10 kDa precursor [Solanum lycopersicum]
Solyc03g116690.3	1.6718	0.000409321	K03006//DNA-directed RNA polymerase II subunit RPB1 [EC:2.7.7.6]+ko03020//RNA polymerase;K04733//interleukin-1 receptor-associated kinase 4 [EC:2.7.11.1]	GO:0031226//intrinsic component of plasma membrane;GO:0044464//cell part;GO:0044459//plasma membrane part;GO:0031225//anchored component of membrane;GO:0005623//cell;GO:0016020//membrane;GO:0046658//anchored component of plasma membrane;GO:0031224//intrinsic component of membrane;GO:0005886//plasma membrane;GO:0071944//cell periphery;GO:0044425//membrane part;GO:0016491//oxidoreductase activity;G…	XP_004235960.1|3.5e-107|PREDICTED: cucumber peeling cupredoxin-like [Solanum lycopersicum]
Solyc02g089010.2	1.67143	1.85128e-55	K13429//chitin elicitor receptor kinase 1+ko04626//Plant-pathogen interaction	GO:0044425//membrane part;GO:0016021//integral component of membrane;GO:0031224//intrinsic component of membrane;GO:0016020//membrane;GO:0032559//adenyl ribonucleotide binding;GO:0008144//drug binding;GO:0030554//adenyl nucleotide binding;GO:0004672//protein kinase activity;GO:1901265//nucleoside phosphate binding;GO:0016740//transferase activity;GO:0043167//ion binding;GO:0004674//protein serine…	XP_006348155.1|1.6e-41|PREDICTED: chitin elicitor receptor kinase 1-like [Solanum tuberosum]
Solyc05g052680.1	1.66637	2.10724e-06	K22889//trichothecene 3-O-acetyltransferase [EC:2.3.1.-]	GO:0016740//transferase activity;GO:0016746//transferase activity, transferring acyl groups;GO:0003824//catalytic activity;GO:0016747//transferase activity, transferring acyl groups other than amino-acyl groups;	XP_004239935.1|2.8e-269|PREDICTED: BAHD acyltransferase DCR [Solanum lycopersicum]
Solyc08g077370.3	1.66345	2.14056e-97	K07893//Ras-related protein Rab-6A;K00850//6-phosphofructokinase 1 [EC:2.7.1.11]+ko00010//Glycolysis / Gluconeogenesis+ko00030//Pentose phosphate pathway+ko01230//Biosynthesis of amino acids+ko03018//RNA degradation+ko01100//Metabolic pathways+ko00052//Galactose metabolism+ko00051//Fructose and mannose metabolism+ko01110//Biosynthesis of secondary metabolites+ko01200//Carbon metabolism	GO:0031224//intrinsic component of membrane;GO:0016021//integral component of membrane;GO:0016020//membrane;GO:0044425//membrane part;GO:0005215//transporter activity;	XP_004245857.2|2.2e-142|PREDICTED: probable purine permease 11 [Solanum lycopersicum]
Solyc08g016210.3	1.65491	1.53527e-67	K13420//LRR receptor-like serine/threonine-protein kinase FLS2 [EC:2.7.11.1]+ko04016//MAPK signaling pathway - plant+ko04626//Plant-pathogen interaction	GO:0016021//integral component of membrane;GO:0016020//membrane;GO:0044425//membrane part;GO:0031224//intrinsic component of membrane;	XP_010324742.1|0.0e+00|PREDICTED: LRR receptor-like serine/threonine-protein kinase FLS2 isoform X1 [Solanum lycopersicum]
Solyc02g076640.1	1.64938	3.97981e-36		GO:0006807//nitrogen compound metabolic process;GO:0034654//nucleobase-containing compound biosynthetic process;GO:0032774//RNA biosynthetic process;GO:0010467//gene expression;GO:0044238//primary metabolic process;GO:0018130//heterocycle biosynthetic process;GO:1901576//organic substance biosynthetic process;GO:0046483//heterocycle metabolic process;GO:0006351//transcription, DNA-templated;GO:19…	XP_010316825.1|7.6e-38|PREDICTED: transcription factor TGA2.3 [Solanum lycopersicum]
Solyc06g062460.3	1.64833	3.7298e-144	K10863//aprataxin [EC:3.1.11.7 3.1.11.8 3.1.12.2];K12126//phytochrome-interacting factor 3+ko04712//Circadian rhythm - plant+ko04075//Plant hormone signal transduction	GO:0005488//binding;GO:0046983//protein dimerization activity;GO:0005515//protein binding;	XP_004241947.1|2.4e-222|PREDICTED: transcription factor bHLH87-like [Solanum lycopersicum]
Solyc02g088954.1	1.646	0.000268341	K08739//DNA mismatch repair protein MLH3+ko03430//Mismatch repair	GO:0006996//organelle organization;GO:0043170//macromolecule metabolic process;GO:0046483//heterocycle metabolic process;GO:1903046//meiotic cell cycle process;GO:0044237//cellular metabolic process;GO:0007127//meiosis I;GO:0016043//cellular component organization;GO:0000280//nuclear division;GO:0048285//organelle fission;GO:0035825//homologous recombination;GO:0051716//cellular response to stimu…	XP_015064556.1|8.2e-52|PREDICTED: uncharacterized protein LOC107009714 isoform X1 [Solanum pennellii]
Solyc06g052020.2	1.64424	2.81599e-06			XP_019252955.1|7.7e-14|PREDICTED: uncharacterized protein LOC109231779 [Nicotiana attenuata]
Solyc01g095150.3	1.64004	0		GO:0010035//response to inorganic substance;GO:0001101//response to acid chemical;GO:0009628//response to abiotic stimulus;GO:0009269//response to desiccation;GO:1901700//response to oxygen-containing compound;GO:0006950//response to stress;GO:0050896//response to stimulus;GO:0042221//response to chemical;GO:0009415//response to water;GO:0009414//response to water deprivation;	NP_001234431.1|2.3e-93|late embryogenesis (Lea)-like protein [Solanum lycopersicum]
Solyc12g006840.2	1.63693	3.07212e-32	K04733//interleukin-1 receptor-associated kinase 4 [EC:2.7.11.1]	GO:0006807//nitrogen compound metabolic process;GO:0044267//cellular protein metabolic process;GO:0043412//macromolecule modification;GO:0009987//cellular process;GO:0036211//protein modification process;GO:0071704//organic substance metabolic process;GO:0044260//cellular macromolecule metabolic process;GO:0019538//protein metabolic process;GO:0016310//phosphorylation;GO:0006464//cellular protein…	XP_010314054.2|0.0e+00|PREDICTED: G-type lectin S-receptor-like serine/threonine-protein kinase CES101 [Solanum lycopersicum]
Solyc03g043855.1	1.63369	1.91925e-08	K03574//8-oxo-dGTP diphosphatase [EC:3.6.1.55]	GO:0044238//primary metabolic process;GO:0009987//cellular process;GO:0072523//purine-containing compound catabolic process;GO:0044237//cellular metabolic process;GO:0034655//nucleobase-containing compound catabolic process;GO:0009217//purine deoxyribonucleoside triphosphate catabolic process;GO:0006950//response to stress;GO:0009155//purine deoxyribonucleotide catabolic process;GO:1901361//organ…	XP_004234643.1|8.9e-83|PREDICTED: nudix hydrolase 1-like [Solanum lycopersicum]
Solyc12g036470.2	1.63335	1.92499e-08	K04733//interleukin-1 receptor-associated kinase 4 [EC:2.7.11.1];K11253//histone H3;K12126//phytochrome-interacting factor 3+ko04712//Circadian rhythm - plant+ko04075//Plant hormone signal transduction	GO:0046983//protein dimerization activity;GO:0005488//binding;GO:0005515//protein binding;	XP_004252234.1|3.2e-155|PREDICTED: transcription factor BEE 1-like [Solanum lycopersicum]
Solyc08g078207.1	1.63227	3.57336e-12	K03347//cullin 1+ko04141//Protein processing in endoplasmic reticulum+ko04120//Ubiquitin mediated proteolysis;K04733//interleukin-1 receptor-associated kinase 4 [EC:2.7.11.1];K19041//E3 ubiquitin-protein ligase RNF38/44 [EC:2.3.2.27]		XP_004245797.1|2.7e-140|PREDICTED: putative RING-H2 finger protein ATL21A [Solanum lycopersicum]
Solyc04g079820.3	1.63227	1.10431e-06	K01106//inositol-1,4,5-trisphosphate 5-phosphatase [EC:3.1.3.56]+ko01100//Metabolic pathways+ko04070//Phosphatidylinositol signaling system+ko00562//Inositol phosphate metabolism	GO:0006629//lipid metabolic process;GO:0006796//phosphate-containing compound metabolic process;GO:0006644//phospholipid metabolic process;GO:0044238//primary metabolic process;GO:0071704//organic substance metabolic process;GO:0046486//glycerolipid metabolic process;GO:0046488//phosphatidylinositol metabolic process;GO:0016311//dephosphorylation;GO:0006650//glycerophospholipid metabolic process;…	XP_004238215.1|6.5e-196|PREDICTED: type IV inositol polyphosphate 5-phosphatase 11 [Solanum lycopersicum]
Solyc06g053710.3	1.62687	7.22704e-90	K14509//ethylene receptor [EC:2.7.13.-]+ko04016//MAPK signaling pathway - plant+ko04075//Plant hormone signal transduction	GO:0009968//negative regulation of signal transduction;GO:0010648//negative regulation of cell communication;GO:0065007//biological regulation;GO:0048519//negative regulation of biological process;GO:0009966//regulation of signal transduction;GO:0050794//regulation of cellular process;GO:1902532//negative regulation of intracellular signal transduction;GO:0048585//negative regulation of response …	NP_001234205.1|0.0e+00|ethylene receptor homolog precursor [Solanum lycopersicum]
Solyc08g062180.2	1.62664	2.7984e-219	K09285//AP2-like factor, ANT lineage		XP_004245057.1|1.5e-226|PREDICTED: protein BIG GRAIN 1-like A [Solanum lycopersicum]
Solyc08g068850.3	1.62222	4.02602e-05		GO:0050789//regulation of biological process;GO:0065007//biological regulation;GO:0032879//regulation of localization;GO:0043269//regulation of ion transport;GO:0010155//regulation of proton transport;GO:0051049//regulation of transport;GO:0043231//intracellular membrane-bounded organelle;GO:0043227//membrane-bounded organelle;GO:0044444//cytoplasmic part;GO:0043229//intracellular organelle;GO:00…	NP_001316136.1|5.5e-109|uncharacterized protein LOC101268894 isozyme 1 [Solanum lycopersicum]
Solyc04g064530.1	1.62165	2.87982e-242	K12619//5'-3' exoribonuclease 2 [EC:3.1.13.-]+ko03018//RNA degradation+ko03008//Ribosome biogenesis in eukaryotes	GO:0044425//membrane part;GO:0016020//membrane;GO:0031224//intrinsic component of membrane;GO:0016021//integral component of membrane;	XP_004237719.1|1.5e-193|PREDICTED: uncharacterized protein LOC101258062 [Solanum lycopersicum]
Solyc12g009560.2	1.61999	0	K14515//EIN3-binding F-box protein+ko04016//MAPK signaling pathway - plant+ko04075//Plant hormone signal transduction		NP_001234858.1|0.0e+00|EIN3-binding F-box protein 1 [Solanum lycopersicum]
Solyc01g067125.1	1.61777	2.19049e-13	K03347//cullin 1+ko04141//Protein processing in endoplasmic reticulum+ko04120//Ubiquitin mediated proteolysis		XP_010321250.1|1.6e-34|PREDICTED: cullin-1-like isoform X1 [Solanum lycopersicum]
Solyc05g052050.1	1.61632	5.4197e-301	K13432//pathogenesis-related genes transcriptional activator PTI4+ko04626//Plant-pathogen interaction;K09286//EREBP-like factor	GO:0090304//nucleic acid metabolic process;GO:1901362//organic cyclic compound biosynthetic process;GO:0043170//macromolecule metabolic process;GO:0010467//gene expression;GO:0032774//RNA biosynthetic process;GO:0044271//cellular nitrogen compound biosynthetic process;GO:0006351//transcription, DNA-templated;GO:0006725//cellular aromatic compound metabolic process;GO:0097659//nucleic acid-templat…	NP_001334005.1|5.4e-131|DNA-binding protein Pti4 [Solanum lycopersicum]
Solyc01g068490.3	1.6148	5.41875e-45	K08332//vacuolar protein 8	GO:0043229//intracellular organelle;GO:0043226//organelle;GO:0043231//intracellular membrane-bounded organelle;GO:0005622//intracellular;GO:0005623//cell;GO:0005634//nucleus;GO:0005737//cytoplasm;GO:0043227//membrane-bounded organelle;GO:0044464//cell part;GO:0044424//intracellular part;	XP_004229286.2|0.0e+00|PREDICTED: U-box domain-containing protein 44-like [Solanum lycopersicum]
Solyc09g005860.3	1.61287	2.06037e-192	K01184//polygalacturonase [EC:3.2.1.15]+ko00040//Pentose and glucuronate interconversions+ko01100//Metabolic pathways;K15503//serine/threonine-protein phosphatase 6 regulatory ankyrin repeat subunit B	GO:0016021//integral component of membrane;GO:0016020//membrane;GO:0031224//intrinsic component of membrane;GO:0044425//membrane part;	NP_001306058.1|1.3e-302|ankyrin repeat-containing protein [Solanum lycopersicum]
Solyc06g007180.3	1.61036	1.63051e-134	K01953//asparagine synthase (glutamine-hydrolysing) [EC:6.3.5.4]+ko00250//Alanine, aspartate and glutamate metabolism+ko01230//Biosynthesis of amino acids+ko01100//Metabolic pathways+ko01110//Biosynthesis of secondary metabolites	GO:0032787//monocarboxylic acid metabolic process;GO:0006529//asparagine biosynthetic process;GO:0006541//glutamine metabolic process;GO:0044238//primary metabolic process;GO:0008652//cellular amino acid biosynthetic process;GO:0044281//small molecule metabolic process;GO:0006807//nitrogen compound metabolic process;GO:0019752//carboxylic acid metabolic process;GO:0044237//cellular metabolic proc…	XP_009766230.1|0.0e+00|PREDICTED: asparagine synthetase [glutamine-hydrolyzing] [Nicotiana sylvestris]
Solyc08g076010.3	1.60783	4.23859e-13	K19613//leucine-rich repeat protein SHOC2;K15078//structure-specific endonuclease subunit SLX1 [EC:3.6.1.-]	GO:0007154//cell communication;GO:0051716//cellular response to stimulus;GO:0006950//response to stress;GO:0050789//regulation of biological process;GO:0050896//response to stimulus;GO:0007165//signal transduction;GO:0009987//cellular process;GO:0006952//defense response;GO:0023052//signaling;GO:0050794//regulation of cellular process;GO:0065007//biological regulation;GO:0044464//cell part;GO:000…	XP_004245923.1|0.0e+00|PREDICTED: putative disease resistance protein RGA4 [Solanum lycopersicum]
Solyc03g120990.3	1.60361	2.52173e-161	K00029//malate dehydrogenase (oxaloacetate-decarboxylating)(NADP+) [EC:1.1.1.40]+ko01100//Metabolic pathways+ko00710//Carbon fixation in photosynthetic organisms+ko00620//Pyruvate metabolism+ko01200//Carbon metabolism	GO:0044281//small molecule metabolic process;GO:0006108//malate metabolic process;GO:0006082//organic acid metabolic process;GO:0071704//organic substance metabolic process;GO:0006090//pyruvate metabolic process;GO:0019752//carboxylic acid metabolic process;GO:0043648//dicarboxylic acid metabolic process;GO:0009987//cellular process;GO:0043436//oxoacid metabolic process;GO:0008152//metabolic proc…	XP_016483794.1|0.0e+00|PREDICTED: NADP-dependent malic enzyme, chloroplastic-like [Nicotiana tabacum]
Solyc02g062550.3	1.6036	4.19144e-24	K08900//mitochondrial chaperone BCS1	GO:0097159//organic cyclic compound binding;GO:0030554//adenyl nucleotide binding;GO:0017076//purine nucleotide binding;GO:0008144//drug binding;GO:0036094//small molecule binding;GO:1901363//heterocyclic compound binding;GO:0043167//ion binding;GO:0032553//ribonucleotide binding;GO:1901265//nucleoside phosphate binding;GO:0043168//anion binding;GO:0005488//binding;GO:0032559//adenyl ribonucleoti…	XP_004233533.1|2.5e-283|PREDICTED: protein HYPER-SENSITIVITY-RELATED 4-like [Solanum lycopersicum]
Solyc02g031990.1	1.60296	4.20057e-08			XP_015064669.1|2.1e-69|PREDICTED: uncharacterized protein LOC107009869 [Solanum pennellii]
Solyc06g050500.2	1.60116	5.8043e-67	K14496//abscisic acid receptor PYR/PYL family+ko04016//MAPK signaling pathway - plant+ko04075//Plant hormone signal transduction	GO:0044425//membrane part;GO:0016021//integral component of membrane;GO:0031224//intrinsic component of membrane;GO:0016020//membrane;	XP_004241105.1|1.5e-157|PREDICTED: abscisic acid receptor PYL4 [Solanum lycopersicum]
Solyc09g061840.3	1.60058	0	K07513//acetyl-CoA acyltransferase 1 [EC:2.3.1.16]+ko04146//Peroxisome+ko00280//Valine, leucine and isoleucine degradation+ko00592//alpha-Linolenic acid metabolism+ko01100//Metabolic pathways+ko01110//Biosynthesis of secondary metabolites+ko01212//Fatty acid metabolism+ko01040//Biosynthesis of unsaturated fatty acids+ko00071//Fatty acid degradation	GO:0008152//metabolic process;GO:0043227//membrane-bounded organelle;GO:0005777//peroxisome;GO:0043226//organelle;GO:0005622//intracellular;GO:0044464//cell part;GO:0005737//cytoplasm;GO:0044424//intracellular part;GO:0005623//cell;GO:0042579//microbody;GO:0043229//intracellular organelle;GO:0043231//intracellular membrane-bounded organelle;GO:0044444//cytoplasmic part;GO:0003824//catalytic activ…	XP_004247103.1|2.2e-256|PREDICTED: 3-ketoacyl-CoA thiolase 2, peroxisomal [Solanum lycopersicum]
Solyc04g049920.3	1.59555	4.98718e-16	K12741//heterogeneous nuclear ribonucleoprotein A1/A3+ko03040//Spliceosome	GO:0003723//RNA binding;GO:0097159//organic cyclic compound binding;GO:0003676//nucleic acid binding;GO:0005488//binding;GO:1901363//heterocyclic compound binding;	XP_004237522.1|6.2e-127|PREDICTED: probable RNA-binding protein ARP1 isoform X2 [Solanum lycopersicum]
Solyc08g080640.2	1.59197	2.14232e-20	K04733//interleukin-1 receptor-associated kinase 4 [EC:2.7.11.1]	GO:0050832//defense response to fungus;GO:0009605//response to external stimulus;GO:0044419//interspecies interaction between organisms;GO:0009620//response to fungus;GO:0035821//modification of morphology or physiology of other organism;GO:0043207//response to external biotic stimulus;GO:0051707//response to other organism;GO:0051704//multi-organism process;GO:0050896//response to stimulus;GO:00…	NP_001292922.1|3.1e-153|protein NP24 precursor [Solanum lycopersicum]
Solyc04g079240.3	1.59016	1.48471e-13	K16815//calcium-independent phospholipase A2-gamma	GO:1901575//organic substance catabolic process;GO:0006629//lipid metabolic process;GO:0071704//organic substance metabolic process;GO:0016042//lipid catabolic process;GO:0044238//primary metabolic process;GO:0008152//metabolic process;GO:0009056//catabolic process;GO:0005622//intracellular;GO:0016020//membrane;GO:0044464//cell part;GO:0005737//cytoplasm;GO:0044424//intracellular part;GO:0005623/…	XP_010320346.1|2.7e-235|PREDICTED: patatin-like protein 2 [Solanum lycopersicum]
Solyc07g052790.2	1.58852	2.58906e-147	K19613//leucine-rich repeat protein SHOC2	GO:0007154//cell communication;GO:0023052//signaling;GO:0050794//regulation of cellular process;GO:0050789//regulation of biological process;GO:0007165//signal transduction;GO:0009987//cellular process;GO:0051716//cellular response to stimulus;GO:0065007//biological regulation;GO:0050896//response to stimulus;GO:0032553//ribonucleotide binding;GO:0000166//nucleotide binding;GO:0097367//carbohydra…	XP_010323797.2|0.0e+00|PREDICTED: TMV resistance protein N-like [Solanum lycopersicum]
Solyc06g063060.3	1.58745	2.56831e-40			NP_001335309.1|4.0e-76|uncharacterized protein LOC101253198 [Solanum lycopersicum]
Solyc09g011630.3	1.58659	2.74348e-22	K00799//glutathione S-transferase [EC:2.5.1.18]+ko00480//Glutathione metabolism	GO:0006575//cellular modified amino acid metabolic process;GO:0044237//cellular metabolic process;GO:0071704//organic substance metabolic process;GO:0009987//cellular process;GO:0009404//toxin metabolic process;GO:0009056//catabolic process;GO:0006749//glutathione metabolic process;GO:0006518//peptide metabolic process;GO:0034641//cellular nitrogen compound metabolic process;GO:0098754//detoxific…	NP_001234086.1|3.9e-124|uncharacterized LOC543814 [Solanum lycopersicum]
Solyc11g072620.1	1.58474	3.89996e-08			OIT37817.1|9.5e-08|hypothetical protein A4A49_33438 [Nicotiana attenuata]
Solyc05g051530.3	1.58242	1.23025e-25	K05681//ATP-binding cassette, subfamily G (WHITE), member 2+ko02010//ABC transporters	GO:0016021//integral component of membrane;GO:0016020//membrane;GO:0044425//membrane part;GO:0031224//intrinsic component of membrane;GO:0017076//purine nucleotide binding;GO:0017111//nucleoside-triphosphatase activity;GO:0003824//catalytic activity;GO:0016817//hydrolase activity, acting on acid anhydrides;GO:1901363//heterocyclic compound binding;GO:0016818//hydrolase activity, acting on acid an…	XP_006366225.1|0.0e+00|PREDICTED: ABC transporter G family member 11-like [Solanum tuberosum]
Solyc08g021820.3	1.58114	7.84107e-128	K14484//auxin-responsive protein IAA+ko04075//Plant hormone signal transduction	GO:0071495//cellular response to endogenous stimulus;GO:0044260//cellular macromolecule metabolic process;GO:0043170//macromolecule metabolic process;GO:0044271//cellular nitrogen compound biosynthetic process;GO:0034654//nucleobase-containing compound biosynthetic process;GO:0009058//biosynthetic process;GO:0060255//regulation of macromolecule metabolic process;GO:0050896//response to stimulus;G…	NP_001266091.1|1.8e-134|IAA29 [Solanum lycopersicum]
Solyc12g097020.2	1.5782	3.40155e-12	K22038//volume-regulated anion channel;K08852//serine/threonine-protein kinase/endoribonuclease IRE1 [EC:2.7.11.1 3.1.26.-]+ko04141//Protein processing in endoplasmic reticulum	GO:0050896//response to stimulus;GO:0007165//signal transduction;GO:0050794//regulation of cellular process;GO:0051716//cellular response to stimulus;GO:0065007//biological regulation;GO:0023052//signaling;GO:0050789//regulation of biological process;GO:0007154//cell communication;GO:0009987//cellular process;GO:0032555//purine ribonucleotide binding;GO:1901363//heterocyclic compound binding;GO:1…	XP_015061155.1|6.9e-176|PREDICTED: TMV resistance protein N-like [Solanum pennellii]
Solyc04g014997.1	1.57675	1.73232e-10	K13420//LRR receptor-like serine/threonine-protein kinase FLS2 [EC:2.7.11.1]+ko04016//MAPK signaling pathway - plant+ko04626//Plant-pathogen interaction	GO:0031224//intrinsic component of membrane;GO:0016020//membrane;GO:0044425//membrane part;GO:0016021//integral component of membrane;GO:0097159//organic cyclic compound binding;GO:0032559//adenyl ribonucleotide binding;GO:0004672//protein kinase activity;GO:0016772//transferase activity, transferring phosphorus-containing groups;GO:1901363//heterocyclic compound binding;GO:0032555//purine ribonu…	XP_004233904.1|1.5e-25|PREDICTED: LRR receptor-like serine/threonine-protein kinase EFR [Solanum lycopersicum]
Solyc06g075630.3	1.57585	7.26295e-05		GO:0005576//extracellular region;GO:0048046//apoplast;GO:0003824//catalytic activity;GO:0016853//isomerase activity;	XP_004241252.1|6.7e-181|PREDICTED: dirigent protein 25-like isoform X2 [Solanum lycopersicum]
Solyc03g097720.3	1.57385	0.00022341		GO:0005623//cell;GO:0016020//membrane;GO:0044425//membrane part;GO:0044464//cell part;GO:0071944//cell periphery;GO:0005886//plasma membrane;GO:0031224//intrinsic component of membrane;GO:0016021//integral component of membrane;GO:0051540//metal cluster binding;GO:0005488//binding;GO:0048037//cofactor binding;GO:0051536//iron-sulfur cluster binding;	XP_004235355.1|6.6e-99|PREDICTED: CASP-like protein 1F1 isoform X1 [Solanum lycopersicum]
Solyc08g036640.3	1.57104	2.99475e-42	K13464//jasmonate ZIM domain-containing protein+ko04075//Plant hormone signal transduction	GO:0009966//regulation of signal transduction;GO:0019219//regulation of nucleobase-containing compound metabolic process;GO:0031347//regulation of defense response;GO:0048519//negative regulation of biological process;GO:0050794//regulation of cellular process;GO:0048523//negative regulation of cellular process;GO:0065007//biological regulation;GO:0051253//negative regulation of RNA metabolic pro…	XP_004244920.1|9.5e-57|PREDICTED: protein TIFY 5A-like [Solanum lycopersicum]
Solyc03g118900.2	1.57087	3.60274e-06	K17500//integrin-linked kinase-associated serine/threonine phosphatase 2C [EC:3.1.3.16]	GO:0006810//transport;GO:0051234//establishment of localization;GO:0051179//localization;GO:0071944//cell periphery;GO:0031224//intrinsic component of membrane;GO:0016021//integral component of membrane;GO:0005886//plasma membrane;GO:0005623//cell;GO:0044425//membrane part;GO:0016020//membrane;GO:0044464//cell part;GO:0005215//transporter activity;GO:0022857//transmembrane transporter activity;	XP_004236428.1|3.2e-199|PREDICTED: WAT1-related protein At3g18200 [Solanum lycopersicum]
Solyc09g011570.3	1.56356	5.38896e-05	K00799//glutathione S-transferase [EC:2.5.1.18]+ko00480//Glutathione metabolism	GO:0043603//cellular amide metabolic process;GO:0006790//sulfur compound metabolic process;GO:0044248//cellular catabolic process;GO:1901564//organonitrogen compound metabolic process;GO:0051186//cofactor metabolic process;GO:0050896//response to stimulus;GO:0042221//response to chemical;GO:0009987//cellular process;GO:0006807//nitrogen compound metabolic process;GO:0019748//secondary metabolic p…	XP_010325821.1|9.8e-116|PREDICTED: probable glutathione S-transferase [Solanum lycopersicum]
Solyc03g120320.1	1.56265	0.000391932	K04733//interleukin-1 receptor-associated kinase 4 [EC:2.7.11.1]	GO:0030163//protein catabolic process;GO:0016567//protein ubiquitination;GO:0009056//catabolic process;GO:0009987//cellular process;GO:0044265//cellular macromolecule catabolic process;GO:0043161//proteasome-mediated ubiquitin-dependent protein catabolic process;GO:0051171//regulation of nitrogen compound metabolic process;GO:1901564//organonitrogen compound metabolic process;GO:0006508//proteoly…	XP_010318559.1|2.7e-214|PREDICTED: F-box/kelch-repeat protein At1g80440-like [Solanum lycopersicum]
Solyc04g082500.3	1.55993	5.59138e-17	K04733//interleukin-1 receptor-associated kinase 4 [EC:2.7.11.1]	GO:0006807//nitrogen compound metabolic process;GO:1901564//organonitrogen compound metabolic process;GO:0006793//phosphorus metabolic process;GO:0007166//cell surface receptor signaling pathway;GO:0051716//cellular response to stimulus;GO:0044238//primary metabolic process;GO:0044237//cellular metabolic process;GO:0006464//cellular protein modification process;GO:0050794//regulation of cellular …	XP_010320466.1|3.4e-244|PREDICTED: probable serine/threonine-protein kinase NAK isoform X2 [Solanum lycopersicum]
Solyc02g091250.1	1.55358	2.00075e-23		GO:0031224//intrinsic component of membrane;GO:0016021//integral component of membrane;GO:0044425//membrane part;GO:0016020//membrane;	XP_010317275.1|2.8e-68|PREDICTED: uncharacterized protein LOC104645999 [Solanum lycopersicum]
Solyc08g078060.3	1.5504	1.29468e-39	K09838//zeaxanthin epoxidase [EC:1.14.15.21]+ko00906//Carotenoid biosynthesis+ko01100//Metabolic pathways+ko01110//Biosynthesis of secondary metabolites	GO:0043167//ion binding;GO:0050660//flavin adenine dinucleotide binding;GO:0005488//binding;GO:1901363//heterocyclic compound binding;GO:0071949//FAD binding;GO:0048037//cofactor binding;GO:0050662//coenzyme binding;GO:0000166//nucleotide binding;GO:0043168//anion binding;GO:0036094//small molecule binding;GO:0097159//organic cyclic compound binding;GO:1901265//nucleoside phosphate binding;	XP_006359228.1|3.1e-114|PREDICTED: FAD-dependent urate hydroxylase-like [Solanum tuberosum]
Solyc03g093610.1	1.5487	3.44468e-43	K09286//EREBP-like factor	GO:0050794//regulation of cellular process;GO:0019438//aromatic compound biosynthetic process;GO:0008152//metabolic process;GO:0090304//nucleic acid metabolic process;GO:0043170//macromolecule metabolic process;GO:0034641//cellular nitrogen compound metabolic process;GO:0071704//organic substance metabolic process;GO:0007165//signal transduction;GO:0035556//intracellular signal transduction;GO:00…	NP_001316388.2|2.9e-135|ethylene-responsive transcription factor 1 [Solanum lycopersicum]
Solyc09g072810.3	1.54632	0.000103445	K13420//LRR receptor-like serine/threonine-protein kinase FLS2 [EC:2.7.11.1]+ko04016//MAPK signaling pathway - plant+ko04626//Plant-pathogen interaction;K04733//interleukin-1 receptor-associated kinase 4 [EC:2.7.11.1]	GO:0016020//membrane;GO:0044425//membrane part;GO:0031224//intrinsic component of membrane;GO:0016021//integral component of membrane;GO:0032559//adenyl ribonucleotide binding;GO:0032553//ribonucleotide binding;GO:1901265//nucleoside phosphate binding;GO:0032555//purine ribonucleotide binding;GO:0016773//phosphotransferase activity, alcohol group as acceptor;GO:0016740//transferase activity;GO:00…	XP_004247501.1|0.0e+00|PREDICTED: MDIS1-interacting receptor like kinase 2-like [Solanum lycopersicum]
Solyc08g078650.3	1.54627	0.000838057	K00750//glycogenin [EC:2.4.1.186]+ko01100//Metabolic pathways+ko00500//Starch and sucrose metabolism;K22809//inositol phosphorylceramide glucuronosyltransferase 1 [EC:2.4.1.-]	GO:0043413//macromolecule glycosylation;GO:0044237//cellular metabolic process;GO:0009987//cellular process;GO:0009059//macromolecule biosynthetic process;GO:0044260//cellular macromolecule metabolic process;GO:0006464//cellular protein modification process;GO:1901137//carbohydrate derivative biosynthetic process;GO:0006807//nitrogen compound metabolic process;GO:0043170//macromolecule metabolic …	XP_004245766.1|2.6e-279|PREDICTED: putative glucuronosyltransferase PGSIP8 [Solanum lycopersicum]
Solyc09g065770.1	1.54627	0.000838057	K12183//ESCRT-I complex subunit TSG101+ko04144//Endocytosis	GO:0006464//cellular protein modification process;GO:0008104//protein localization;GO:0009987//cellular process;GO:0043170//macromolecule metabolic process;GO:0043412//macromolecule modification;GO:0044267//cellular protein metabolic process;GO:0006807//nitrogen compound metabolic process;GO:0015031//protein transport;GO:0015833//peptide transport;GO:0044238//primary metabolic process;GO:0045184/…	XP_004247334.1|5.1e-202|PREDICTED: protein ELC-like [Solanum lycopersicum]
Solyc08g062330.3	1.54525	1.40658e-143	K15503//serine/threonine-protein phosphatase 6 regulatory ankyrin repeat subunit B;K21952//CASK-interacting protein;K21435//ankyrin repeat domain-containing protein 6	GO:0050896//response to stimulus;GO:0007165//signal transduction;GO:0065007//biological regulation;GO:0051716//cellular response to stimulus;GO:0023052//signaling;GO:0009987//cellular process;GO:0007154//cell communication;GO:0050794//regulation of cellular process;GO:0050789//regulation of biological process;GO:0031224//intrinsic component of membrane;GO:0016021//integral component of membrane;G…	XP_004245062.1|5.9e-261|PREDICTED: homeobox protein Wariai-like [Solanum lycopersicum]
Solyc12g056360.1	1.54236	1.78119e-18	K04733//interleukin-1 receptor-associated kinase 4 [EC:2.7.11.1]		XP_010314488.1|1.8e-139|PREDICTED: thaumatin-like protein [Solanum lycopersicum]
Solyc02g067680.1	1.54177	3.93932e-48	K19041//E3 ubiquitin-protein ligase RNF38/44 [EC:2.3.2.27]	GO:0016020//membrane;GO:0016021//integral component of membrane;GO:0031224//intrinsic component of membrane;GO:0044425//membrane part;	XP_004233335.1|1.7e-208|PREDICTED: RING-H2 finger protein ATL46-like [Solanum lycopersicum]
Solyc07g019430.1	1.53953	1.98322e-07
Solyc04g014650.3	1.53627	1.304e-24	K13420//LRR receptor-like serine/threonine-protein kinase FLS2 [EC:2.7.11.1]+ko04016//MAPK signaling pathway - plant+ko04626//Plant-pathogen interaction	GO:0044425//membrane part;GO:0016020//membrane;GO:0031224//intrinsic component of membrane;GO:0016021//integral component of membrane;GO:0097367//carbohydrate derivative binding;GO:0016301//kinase activity;GO:0043167//ion binding;GO:0097159//organic cyclic compound binding;GO:1901363//heterocyclic compound binding;GO:0032559//adenyl ribonucleotide binding;GO:0043168//anion binding;GO:0016740//tra…	XP_015163992.1|1.6e-244|PREDICTED: LRR receptor-like serine/threonine-protein kinase EFR [Solanum tuberosum]
Solyc03g093890.3	1.52664	3.05074e-06	K09422//transcription factor MYB, plant	GO:0048869//cellular developmental process;GO:0080090//regulation of primary metabolic process;GO:0065007//biological regulation;GO:0051252//regulation of RNA metabolic process;GO:0009889//regulation of biosynthetic process;GO:0009987//cellular process;GO:0010468//regulation of gene expression;GO:0050794//regulation of cellular process;GO:0060255//regulation of macromolecule metabolic process;GO:…	NP_001333764.1|4.2e-148|R2R3MYB transcription factor 52 [Solanum lycopersicum]
Solyc12g096680.1	1.52585	1.90675e-06	K22733//magnesium transporter;K22565//COMM domain containing 9	GO:0043169//cation binding;GO:0046914//transition metal ion binding;GO:0008270//zinc ion binding;GO:0043167//ion binding;GO:0046872//metal ion binding;GO:0005488//binding;	XP_006342434.1|0.0e+00|PREDICTED: pentatricopeptide repeat-containing protein At2g03880, mitochondrial [Solanum tuberosum]
Solyc06g076020.3	1.52356	1.73863e-193	K03283//heat shock 70kDa protein 1/2/6/8+ko03040//Spliceosome+ko04144//Endocytosis+ko04141//Protein processing in endoplasmic reticulum	GO:0036094//small molecule binding;GO:0030554//adenyl nucleotide binding;GO:0043168//anion binding;GO:0097367//carbohydrate derivative binding;GO:0097159//organic cyclic compound binding;GO:1901363//heterocyclic compound binding;GO:0005488//binding;GO:0032555//purine ribonucleotide binding;GO:0017076//purine nucleotide binding;GO:0032559//adenyl ribonucleotide binding;GO:0005524//ATP binding;GO:0…	NP_001234491.2|0.0e+00|heat shock cognate 70 kDa protein 1 [Solanum lycopersicum]
Solyc04g011840.1	1.51586	4.4716e-16	K03676//glutaredoxin 3	GO:0050794//regulation of cellular process;GO:0009987//cellular process;GO:0065007//biological regulation;GO:0045454//cell redox homeostasis;GO:0042592//homeostatic process;GO:0019725//cellular homeostasis;GO:0050789//regulation of biological process;GO:0065008//regulation of biological quality;GO:0005623//cell;GO:0015036//disulfide oxidoreductase activity;GO:0016491//oxidoreductase activity;GO:0…	XP_004236717.1|4.1e-51|PREDICTED: monothiol glutaredoxin-S1-like [Solanum lycopersicum]
Solyc03g116700.3	1.51433	1.49855e-66	K03006//DNA-directed RNA polymerase II subunit RPB1 [EC:2.7.7.6]+ko03020//RNA polymerase;K04733//interleukin-1 receptor-associated kinase 4 [EC:2.7.11.1]	GO:0046658//anchored component of plasma membrane;GO:0005886//plasma membrane;GO:0044425//membrane part;GO:0016020//membrane;GO:0044459//plasma membrane part;GO:0005623//cell;GO:0031226//intrinsic component of plasma membrane;GO:0031225//anchored component of membrane;GO:0044464//cell part;GO:0071944//cell periphery;GO:0031224//intrinsic component of membrane;GO:0009055//electron transfer activit…	XP_004235961.1|1.8e-102|PREDICTED: cucumber peeling cupredoxin-like [Solanum lycopersicum]
Solyc10g008400.1	1.51418	1.56327e-94	K10666//E3 ubiquitin-protein ligase RNF5 [EC:2.3.2.27]+ko04141//Protein processing in endoplasmic reticulum	GO:0010243//response to organonitrogen compound;GO:1901564//organonitrogen compound metabolic process;GO:0006464//cellular protein modification process;GO:0006950//response to stress;GO:0036503//ERAD pathway;GO:0035967//cellular response to topologically incorrect protein;GO:0010498//proteasomal protein catabolic process;GO:0043632//modification-dependent macromolecule catabolic process;GO:007064…	XP_004248161.1|3.3e-130|PREDICTED: E3 ubiquitin-protein ligase RMA1H1 [Solanum lycopersicum]
Solyc08g066310.2	1.51272	2.06835e-67	K00924//kinase [EC:2.7.1.-]	GO:0016773//phosphotransferase activity, alcohol group as acceptor;GO:0032559//adenyl ribonucleotide binding;GO:0097159//organic cyclic compound binding;GO:0032555//purine ribonucleotide binding;GO:0032553//ribonucleotide binding;GO:0004672//protein kinase activity;GO:0097367//carbohydrate derivative binding;GO:0140096//catalytic activity, acting on a protein;GO:0036094//small molecule binding;GO…	XP_004245388.2|0.0e+00|PREDICTED: receptor-like protein kinase 2 [Solanum lycopersicum]
Solyc06g073830.1	1.5109	1.1428e-48	K13448//calcium-binding protein CML+ko04626//Plant-pathogen interaction	GO:0043169//cation binding;GO:0043167//ion binding;GO:0046872//metal ion binding;GO:0005509//calcium ion binding;GO:0005488//binding;	XP_004241366.1|5.2e-97|PREDICTED: putative calcium-binding protein CML19 [Solanum lycopersicum]
Solyc05g050350.2	1.50958	1.20725e-21	K05391//cyclic nucleotide gated channel, plant+ko04626//Plant-pathogen interaction	GO:0042391//regulation of membrane potential;GO:0065007//biological regulation;GO:0065008//regulation of biological quality;GO:0044464//cell part;GO:0005623//cell;GO:0005887//integral component of plasma membrane;GO:0031224//intrinsic component of membrane;GO:0016021//integral component of membrane;GO:0016020//membrane;GO:0071944//cell periphery;GO:0044425//membrane part;GO:0044459//plasma membra…	XP_010321519.1|0.0e+00|PREDICTED: cyclic nucleotide-gated ion channel 1-like [Solanum lycopersicum]
Solyc12g006380.2	1.50858	3.76471e-216	K13229//2,4-dihydroxy-1,4-benzoxazin-3-one-glucoside dioxygenase [EC:1.14.11.59]+ko00402//Benzoxazinoid biosynthesis;K06892//feruloyl-CoA ortho-hydroxylase [EC:1.14.11.-]+ko01110//Biosynthesis of secondary metabolites+ko00940//Phenylpropanoid biosynthesis	GO:0016491//oxidoreductase activity;GO:0051213//dioxygenase activity;GO:0043169//cation binding;GO:0003824//catalytic activity;GO:0046872//metal ion binding;GO:0043167//ion binding;GO:0005488//binding;	NP_001234624.1|2.9e-213|2-oxoglutarate-dependent dioxygenase [Solanum lycopersicum]
Solyc01g090460.3	1.50798	1.99956e-80	K09338//homeobox-leucine zipper protein	GO:0043229//intracellular organelle;GO:0043231//intracellular membrane-bounded organelle;GO:0005622//intracellular;GO:0043226//organelle;GO:0043227//membrane-bounded organelle;GO:0005623//cell;GO:0044464//cell part;GO:0044424//intracellular part;GO:0005634//nucleus;GO:0003676//nucleic acid binding;GO:1901363//heterocyclic compound binding;GO:0140110//transcription regulator activity;GO:0003677//D…	NP_001234233.1|4.1e-161|HD-ZIP protein [Solanum lycopersicum]
Solyc05g005060.3	1.50674	6.79698e-07	K04733//interleukin-1 receptor-associated kinase 4 [EC:2.7.11.1]	GO:0031224//intrinsic component of membrane;GO:0044425//membrane part;GO:0016020//membrane;GO:0016021//integral component of membrane;GO:0036094//small molecule binding;GO:0016740//transferase activity;GO:0008144//drug binding;GO:0097159//organic cyclic compound binding;GO:0004672//protein kinase activity;GO:0003824//catalytic activity;GO:0016301//kinase activity;GO:0000166//nucleotide binding;GO…	XP_004238643.1|4.7e-175|PREDICTED: cysteine-rich receptor-like protein kinase 3 [Solanum lycopersicum]
Solyc05g007640.3	1.50674	7.38981e-05	K07198//5'-AMP-activated protein kinase, catalytic alpha subunit [EC:2.7.11.11];K14497//protein phosphatase 2C [EC:3.1.3.16]+ko04016//MAPK signaling pathway - plant+ko04075//Plant hormone signal transduction;K13453//disease resistance protein+ko04626//Plant-pathogen interaction;K13457//disease resistance protein RPM1+ko04626//Plant-pathogen interaction	GO:0006952//defense response;GO:0006950//response to stress;GO:0050896//response to stimulus;GO:0032553//ribonucleotide binding;GO:0005488//binding;GO:0043531//ADP binding;GO:0043168//anion binding;GO:0017076//purine nucleotide binding;GO:1901363//heterocyclic compound binding;GO:0032559//adenyl ribonucleotide binding;GO:0000166//nucleotide binding;GO:0036094//small molecule binding;GO:0043167//i…	XP_004239390.2|0.0e+00|PREDICTED: putative late blight resistance protein homolog R1C-3 [Solanum lycopersicum]
Solyc03g094145.1	1.50674	0.000479199	K10756//replication factor C subunit 3/5+ko03420//Nucleotide excision repair+ko03030//DNA replication+ko03430//Mismatch repair;K01303//acylaminoacyl-peptidase [EC:3.4.19.1];K05665//ATP-binding cassette, subfamily C (CFTR/MRP), member 1 [EC:7.6.2.3]+ko02010//ABC transporters;K00820//glucosamine---fructose-6-phosphate aminotransferase (isomerizing) [EC:2.6.1.16]+ko00250//Alanine, aspartate and glut…		XP_010312407.1|1.1e-36|PREDICTED: uncharacterized protein LOC104644427 [Solanum lycopersicum]
Solyc06g006000.3	1.50401	7.06262e-267			XP_004240397.1|1.2e-96|PREDICTED: uncharacterized protein LOC101264428 [Solanum lycopersicum]
Solyc03g034020.3	1.50108	2.23567e-114	K08332//vacuolar protein 8	GO:0140096//catalytic activity, acting on a protein;GO:0004842//ubiquitin-protein transferase activity;GO:0003824//catalytic activity;GO:0019787//ubiquitin-like protein transferase activity;GO:0016740//transferase activity;	XP_010317707.1|0.0e+00|PREDICTED: U-box domain-containing protein 5-like isoform X1 [Solanum lycopersicum]
Solyc05g045950.2	1.50075	0.000862764	K03456//serine/threonine-protein phosphatase 2A regulatory subunit A+ko03015//mRNA surveillance pathway		XP_015071503.1|3.1e-69|PREDICTED: serine/threonine-protein phosphatase 2A 65 kDa regulatory subunit A beta isoform-like [Solanum pennellii]
Solyc07g055810.3	1.49905	0	K04733//interleukin-1 receptor-associated kinase 4 [EC:2.7.11.1]	GO:0031224//intrinsic component of membrane;GO:0016020//membrane;GO:0044425//membrane part;GO:0005886//plasma membrane;GO:0071944//cell periphery;GO:0005623//cell;GO:0044464//cell part;GO:0016021//integral component of membrane;GO:0030554//adenyl nucleotide binding;GO:0036094//small molecule binding;GO:0000166//nucleotide binding;GO:1901265//nucleoside phosphate binding;GO:0016773//phosphotransfe…	XP_004243241.1|0.0e+00|PREDICTED: probable LRR receptor-like serine/threonine-protein kinase At1g07650 [Solanum lycopersicum]
Solyc04g054260.3	1.49739	2.63206e-136	K20562//biphenyl-4-hydroxylase	GO:0044550//secondary metabolite biosynthetic process;GO:0009058//biosynthetic process;GO:0019748//secondary metabolic process;GO:0008152//metabolic process;GO:0016020//membrane;GO:0016705//oxidoreductase activity, acting on paired donors, with incorporation or reduction of molecular oxygen;GO:0005488//binding;GO:0043167//ion binding;GO:0046906//tetrapyrrole binding;GO:1901363//heterocyclic compo…	XP_004237435.1|1.4e-292|PREDICTED: cytochrome P450 CYP736A12-like [Solanum lycopersicum]
Solyc06g083700.3	1.49499	2.68449e-75	K11816//indole-3-pyruvate monooxygenase [EC:1.14.13.168]+ko00380//Tryptophan metabolism+ko01100//Metabolic pathways	GO:0016020//membrane;GO:0016021//integral component of membrane;GO:0031224//intrinsic component of membrane;GO:0044425//membrane part;GO:0043167//ion binding;GO:1901265//nucleoside phosphate binding;GO:0005488//binding;GO:1901363//heterocyclic compound binding;GO:0043168//anion binding;GO:0050660//flavin adenine dinucleotide binding;GO:0050661//NADP binding;GO:0036094//small molecule binding;GO:0…	NP_001307957.1|1.9e-244|probable indole-3-pyruvate monooxygenase YUCCA5 [Solanum lycopersicum]
Solyc12g042480.2	1.49114	1.20763e-19	K20562//biphenyl-4-hydroxylase	GO:0009058//biosynthetic process;GO:0019748//secondary metabolic process;GO:0044550//secondary metabolite biosynthetic process;GO:0008152//metabolic process;GO:0031224//intrinsic component of membrane;GO:0016021//integral component of membrane;GO:0044425//membrane part;GO:0016020//membrane;GO:0016491//oxidoreductase activity;GO:0016705//oxidoreductase activity, acting on paired donors, with incor…	XP_004252295.1|1.1e-279|PREDICTED: cytochrome P450 CYP736A12-like [Solanum lycopersicum]
Solyc03g081270.2	1.48913	3.84839e-18	K12130//pseudo-response regulator 5+ko04712//Circadian rhythm - plant	GO:0000160//phosphorelay signal transduction system;GO:0065007//biological regulation;GO:0051716//cellular response to stimulus;GO:0007154//cell communication;GO:0035556//intracellular signal transduction;GO:0023052//signaling;GO:0050896//response to stimulus;GO:0050794//regulation of cellular process;GO:0007165//signal transduction;GO:0009987//cellular process;GO:0050789//regulation of biologica…	XP_004235024.1|3.9e-117|PREDICTED: two-component response regulator-like APRR5 [Solanum lycopersicum]
Solyc09g092310.1	1.48824	6.4867e-25	K13457//disease resistance protein RPM1+ko04626//Plant-pathogen interaction	GO:0007154//cell communication;GO:0023052//signaling;GO:0009987//cellular process;GO:0050896//response to stimulus;GO:0006952//defense response;GO:0051716//cellular response to stimulus;GO:0050789//regulation of biological process;GO:0050794//regulation of cellular process;GO:0007165//signal transduction;GO:0065007//biological regulation;GO:0006950//response to stress;GO:0005886//plasma membrane;…	XP_004247881.1|0.0e+00|PREDICTED: disease resistance protein RPP13-like [Solanum lycopersicum]
Solyc01g059980.3	1.48714	1.1783e-31	K19891//glucan endo-1,3-beta-glucosidase 1/2/3 [EC:3.2.1.39]+ko00500//Starch and sucrose metabolism	GO:0006952//defense response;GO:0006950//response to stress;GO:0005975//carbohydrate metabolic process;GO:0050896//response to stimulus;GO:0008152//metabolic process;GO:0071704//organic substance metabolic process;GO:0044238//primary metabolic process;GO:0044464//cell part;GO:0043227//membrane-bounded organelle;GO:0044459//plasma membrane part;GO:0044444//cytoplasmic part;GO:0031225//anchored com…	NP_001234805.1|3.5e-209|glucan endo-1,3-beta-glucosidase B precursor [Solanum lycopersicum]
Solyc04g014400.3	1.48457	4.7546e-176	K18195//rhamnogalacturonan endolyase [EC:4.2.2.23]	GO:0044425//membrane part;GO:0016020//membrane;GO:0016021//integral component of membrane;GO:0031224//intrinsic component of membrane;GO:0003824//catalytic activity;GO:0016301//kinase activity;GO:0016772//transferase activity, transferring phosphorus-containing groups;GO:0016740//transferase activity;	XP_010319235.1|0.0e+00|PREDICTED: LRR receptor-like serine/threonine-protein kinase FLS2 isoform X2 [Solanum lycopersicum]
Solyc06g048740.2	1.48165	0.000105419	K13420//LRR receptor-like serine/threonine-protein kinase FLS2 [EC:2.7.11.1]+ko04016//MAPK signaling pathway - plant+ko04626//Plant-pathogen interaction	GO:0031224//intrinsic component of membrane;GO:0016021//integral component of membrane;GO:0044425//membrane part;GO:0016020//membrane;GO:0097159//organic cyclic compound binding;GO:0016740//transferase activity;GO:0008144//drug binding;GO:0032559//adenyl ribonucleotide binding;GO:0032553//ribonucleotide binding;GO:0004674//protein serine/threonine kinase activity;GO:0003824//catalytic activity;GO…	XP_010322115.1|0.0e+00|PREDICTED: probable LRR receptor-like serine/threonine-protein kinase At3g47570 [Solanum lycopersicum]
Solyc07g063410.3	1.47834	8.98037e-68	K00521//ferric-chelate reductase [EC:1.16.1.7];K16296//serine carboxypeptidase-like clade I [EC:3.4.16.-];K13126//polyadenylate-binding protein+ko03015//mRNA surveillance pathway+ko03018//RNA degradation+ko03013//RNA transport;K05941//glutathione gamma-glutamylcysteinyltransferase [EC:2.3.2.15]	GO:0044271//cellular nitrogen compound biosynthetic process;GO:0008152//metabolic process;GO:0006139//nucleobase-containing compound metabolic process;GO:0010468//regulation of gene expression;GO:0009987//cellular process;GO:0006355//regulation of transcription, DNA-templated;GO:1903506//regulation of nucleic acid-templated transcription;GO:1901360//organic cyclic compound metabolic process;GO:00…	NP_001306107.1|1.2e-210|JA2-like [Solanum lycopersicum]
Solyc11g008200.1	1.47176	2.76258e-33	K14794//ribosomal RNA-processing protein 12	GO:0055085//transmembrane transport;GO:0006810//transport;GO:0051234//establishment of localization;GO:0051179//localization;GO:0044425//membrane part;GO:0016020//membrane;GO:0031224//intrinsic component of membrane;GO:0016021//integral component of membrane;	XP_004250040.1|0.0e+00|PREDICTED: protein NUCLEAR FUSION DEFECTIVE 4-like [Solanum lycopersicum]
Solyc01g103650.3	1.47065	1.38031e-121	K13696//abhydrolase domain-containing protein 1/3	GO:0071704//organic substance metabolic process;GO:0044238//primary metabolic process;GO:0008152//metabolic process;GO:0044255//cellular lipid metabolic process;GO:0009987//cellular process;GO:0044237//cellular metabolic process;GO:0006629//lipid metabolic process;GO:0016021//integral component of membrane;GO:0016020//membrane;GO:0031224//intrinsic component of membrane;GO:0044425//membrane part;…	XP_004230460.1|2.6e-260|PREDICTED: phospholipase ABHD3 isoform X1 [Solanum lycopersicum]
Solyc07g055710.3	1.47048	3.36998e-19	K09419//heat shock transcription factor, other eukaryote	GO:0044424//intracellular part;GO:0005623//cell;GO:0043231//intracellular membrane-bounded organelle;GO:0043229//intracellular organelle;GO:0043227//membrane-bounded organelle;GO:0043226//organelle;GO:0005634//nucleus;GO:0044464//cell part;GO:0005622//intracellular;GO:0097159//organic cyclic compound binding;GO:0003700//DNA-binding transcription factor activity;GO:0005488//binding;GO:0043565//seq…	XP_004243245.1|1.8e-227|PREDICTED: heat stress transcription factor A-4c-like [Solanum lycopersicum]
Solyc01g104434.1	1.4661	2.36408e-14	K14297//nuclear pore complex protein Nup98-Nup96+ko03013//RNA transport		XP_015165055.1|8.6e-22|PREDICTED: nuclear pore complex protein NUP98B-like isoform X1 [Solanum tuberosum]
Solyc04g011830.1	1.46062	9.06546e-22	K03676//glutaredoxin 3	GO:0065008//regulation of biological quality;GO:0009987//cellular process;GO:0045454//cell redox homeostasis;GO:0042592//homeostatic process;GO:0065007//biological regulation;GO:0019725//cellular homeostasis;GO:0050789//regulation of biological process;GO:0050794//regulation of cellular process;GO:0005623//cell;GO:0015035//protein disulfide oxidoreductase activity;GO:0015036//disulfide oxidoreduc…	XP_004236718.1|5.4e-51|PREDICTED: monothiol glutaredoxin-S1-like [Solanum lycopersicum]
Solyc02g081040.3	1.46046	3.7245e-21	K13429//chitin elicitor receptor kinase 1+ko04626//Plant-pathogen interaction	GO:0016021//integral component of membrane;GO:0031224//intrinsic component of membrane;GO:0016020//membrane;GO:0044425//membrane part;GO:0140096//catalytic activity, acting on a protein;GO:0000166//nucleotide binding;GO:0043167//ion binding;GO:0003824//catalytic activity;GO:0032559//adenyl ribonucleotide binding;GO:0004674//protein serine/threonine kinase activity;GO:0097159//organic cyclic compo…	NP_001234719.1|0.0e+00|Lyk11 precursor [Solanum lycopersicum]
Solyc04g076220.3	1.45739	5.53503e-44		GO:0044249//cellular biosynthetic process;GO:0071704//organic substance metabolic process;GO:0009059//macromolecule biosynthetic process;GO:0046483//heterocycle metabolic process;GO:0044271//cellular nitrogen compound biosynthetic process;GO:0009058//biosynthetic process;GO:0019438//aromatic compound biosynthetic process;GO:0043170//macromolecule metabolic process;GO:0006807//nitrogen compound me…	XP_004237987.1|1.7e-200|PREDICTED: AT-hook motif nuclear-localized protein 17 [Solanum lycopersicum]
Solyc01g086670.3	1.45731	4.48147e-55			KDP43423.1|5.0e-08|hypothetical protein JCGZ_16710 [Jatropha curcas]
Solyc06g036110.1	1.45533	3.83312e-42	K19747//BAHD acyltransferase [EC:2.3.1.-];K05747//Wiskott-Aldrich syndrome protein+ko04144//Endocytosis		XP_004240724.1|5.0e-143|PREDICTED: uncharacterized protein LOC101263030 [Solanum lycopersicum]
Solyc02g071820.3	1.45514	0	K04733//interleukin-1 receptor-associated kinase 4 [EC:2.7.11.1]		XP_010316866.2|0.0e+00|PREDICTED: probable LRR receptor-like serine/threonine-protein kinase At1g07650 [Solanum lycopersicum]
Solyc04g025560.3	1.45489	3.42711e-11	K07937//ADP-ribosylation factor 1+ko04144//Endocytosis	GO:0050789//regulation of biological process;GO:0050794//regulation of cellular process;GO:0065007//biological regulation;GO:0023052//signaling;GO:0007154//cell communication;GO:0051716//cellular response to stimulus;GO:0007165//signal transduction;GO:0007264//small GTPase mediated signal transduction;GO:0050896//response to stimulus;GO:0009987//cellular process;GO:0035556//intracellular signal t…	XP_009629758.1|2.6e-87|PREDICTED: ADP-ribosylation factor 2 isoform X1 [Nicotiana tomentosiformis]
Solyc04g025530.3	1.45187	4.40872e-11	K01580//glutamate decarboxylase [EC:4.1.1.15]+ko00410//beta-Alanine metabolism+ko00250//Alanine, aspartate and glutamate metabolism+ko00430//Taurine and hypotaurine metabolism+ko01100//Metabolic pathways+ko00650//Butanoate metabolism+ko01110//Biosynthesis of secondary metabolites	GO:0006082//organic acid metabolic process;GO:0044238//primary metabolic process;GO:0009987//cellular process;GO:1901605//alpha-amino acid metabolic process;GO:0006807//nitrogen compound metabolic process;GO:0006520//cellular amino acid metabolic process;GO:1901564//organonitrogen compound metabolic process;GO:0006536//glutamate metabolic process;GO:0044281//small molecule metabolic process;GO:00…	XP_016472095.1|7.7e-270|PREDICTED: glutamate decarboxylase 4 [Nicotiana tabacum]
Solyc02g080050.1	1.45173	2.2665e-19	K04733//interleukin-1 receptor-associated kinase 4 [EC:2.7.11.1]	GO:0016021//integral component of membrane;GO:0031224//intrinsic component of membrane;GO:0044425//membrane part;GO:0016020//membrane;GO:0030554//adenyl nucleotide binding;GO:0043167//ion binding;GO:0032559//adenyl ribonucleotide binding;GO:0017076//purine nucleotide binding;GO:0035639//purine ribonucleoside triphosphate binding;GO:1901265//nucleoside phosphate binding;GO:0016773//phosphotransfer…	XP_015063796.1|5.9e-78|PREDICTED: putative receptor-like protein kinase At4g00960 [Solanum pennellii]
Solyc07g042170.3	1.45139	0	K13464//jasmonate ZIM domain-containing protein+ko04075//Plant hormone signal transduction	GO:0009892//negative regulation of metabolic process;GO:0048523//negative regulation of cellular process;GO:0065007//biological regulation;GO:0050794//regulation of cellular process;GO:0010646//regulation of cell communication;GO:0050789//regulation of biological process;GO:0010558//negative regulation of macromolecule biosynthetic process;GO:0051171//regulation of nitrogen compound metabolic pro…	XP_004243696.1|1.7e-118|PREDICTED: protein TIFY 10b-like [Solanum lycopersicum]
Solyc06g036290.3	1.44148	1.17983e-105	K04079//molecular chaperone HtpG+ko04141//Protein processing in endoplasmic reticulum+ko04626//Plant-pathogen interaction	GO:0050896//response to stimulus;GO:0006457//protein folding;GO:0006950//response to stress;GO:0009987//cellular process;GO:0032553//ribonucleotide binding;GO:0005488//binding;GO:0097159//organic cyclic compound binding;GO:1901363//heterocyclic compound binding;GO:0035639//purine ribonucleoside triphosphate binding;GO:0005524//ATP binding;GO:0043168//anion binding;GO:0032555//purine ribonucleotid…	NP_001308492.1|0.0e+00|heat shock protein 90 [Solanum lycopersicum]
Solyc05g046290.3	1.44115	4.06696e-12	K14504//xyloglucan:xyloglucosyl transferase TCH4 [EC:2.4.1.207]+ko04075//Plant hormone signal transduction;K08235//xyloglucan:xyloglucosyl transferase [EC:2.4.1.207]	GO:0044042//glucan metabolic process;GO:0044237//cellular metabolic process;GO:0071704//organic substance metabolic process;GO:0044085//cellular component biogenesis;GO:0008152//metabolic process;GO:0071555//cell wall organization;GO:0044264//cellular polysaccharide metabolic process;GO:0005975//carbohydrate metabolic process;GO:0044036//cell wall macromolecule metabolic process;GO:0044238//prima…	XP_004240131.2|8.2e-171|PREDICTED: probable xyloglucan endotransglucosylase/hydrolase protein 23 [Solanum lycopersicum]
Solyc03g119660.2	1.44091	1.02702e-06		GO:0044425//membrane part;GO:0016020//membrane;GO:0031224//intrinsic component of membrane;GO:0016021//integral component of membrane;	XP_004236417.1|2.1e-255|PREDICTED: pollen-specific leucine-rich repeat extensin-like protein 2 [Solanum lycopersicum]
Solyc04g039980.3	1.43935	1.00264e-05	K19613//leucine-rich repeat protein SHOC2	GO:0050896//response to stimulus;GO:0006952//defense response;GO:0006950//response to stress;GO:0005488//binding;GO:0032555//purine ribonucleotide binding;GO:0043531//ADP binding;GO:0032553//ribonucleotide binding;GO:1901363//heterocyclic compound binding;GO:0017076//purine nucleotide binding;GO:1901265//nucleoside phosphate binding;GO:0043168//anion binding;GO:0036094//small molecule binding;GO:…	XP_006340095.1|5.9e-127|PREDICTED: putative disease resistance protein RGA1 [Solanum tuberosum]
Solyc02g080080.3	1.43824	1.18686e-12	K04733//interleukin-1 receptor-associated kinase 4 [EC:2.7.11.1]	GO:0071704//organic substance metabolic process;GO:0044267//cellular protein metabolic process;GO:0043412//macromolecule modification;GO:0006796//phosphate-containing compound metabolic process;GO:0019538//protein metabolic process;GO:0036211//protein modification process;GO:0043170//macromolecule metabolic process;GO:0008152//metabolic process;GO:0006468//protein phosphorylation;GO:0009987//cell…	XP_010316618.1|0.0e+00|PREDICTED: putative receptor-like protein kinase At4g00960 isoform X1 [Solanum lycopersicum]
Solyc02g079600.3	1.43709	1.93866e-69	K04733//interleukin-1 receptor-associated kinase 4 [EC:2.7.11.1]		XP_019067885.1|5.9e-213|PREDICTED: rust resistance kinase Lr10 [Solanum lycopersicum]
Solyc01g098590.3	1.43399	1.05048e-52		GO:0008152//metabolic process;GO:0044464//cell part;GO:0044444//cytoplasmic part;GO:0005622//intracellular;GO:0005829//cytosol;GO:0005623//cell;GO:0044424//intracellular part;GO:0005737//cytoplasm;GO:0016787//hydrolase activity;GO:0042578//phosphoric ester hydrolase activity;GO:0016791//phosphatase activity;GO:0003824//catalytic activity;GO:0016788//hydrolase activity, acting on ester bonds;	XP_004230164.1|1.2e-167|PREDICTED: phosphoglycerate mutase-like protein AT74 [Solanum lycopersicum]
Solyc01g080890.2	1.43387	1.19118e-53			XP_015063203.1|1.7e-35|PREDICTED: uncharacterized protein LOC107008608 [Solanum pennellii]
Solyc08g006470.3	1.43044	6.64805e-101	K14816//pre-60S factor REI1	GO:0043169//cation binding;GO:0008270//zinc ion binding;GO:0003676//nucleic acid binding;GO:0097159//organic cyclic compound binding;GO:0046872//metal ion binding;GO:0046914//transition metal ion binding;GO:0005488//binding;GO:0043167//ion binding;GO:1901363//heterocyclic compound binding;	XP_004244493.1|3.5e-185|PREDICTED: cytoplasmic 60S subunit biogenesis factor REI1 homolog 1 [Solanum lycopersicum]
Solyc09g082870.2	1.42774	1.81055e-26	K01537//Ca2+-transporting ATPase [EC:3.6.3.8]	GO:0044425//membrane part;GO:0031224//intrinsic component of membrane;GO:0016021//integral component of membrane;GO:0016020//membrane;GO:0022804//active transmembrane transporter activity;GO:0015405//P-P-bond-hydrolysis-driven transmembrane transporter activity;GO:0000166//nucleotide binding;GO:0042626//ATPase activity, coupled to transmembrane movement of substances;GO:0005524//ATP binding;GO:00…	XP_010326729.1|0.0e+00|PREDICTED: putative calcium-transporting ATPase 13, plasma membrane-type [Solanum lycopersicum]
Solyc01g008390.2	1.42714	0.000166321	K19613//leucine-rich repeat protein SHOC2		AAV33691.1|3.3e-204|Hcr9-OR2C [Solanum pimpinellifolium]
Solyc02g089160.3	1.42695	0	K09590//brassinosteroid-6-oxidase 1 [EC:1.14.-.-]+ko00905//Brassinosteroid biosynthesis+ko01100//Metabolic pathways+ko01110//Biosynthesis of secondary metabolites	GO:0044238//primary metabolic process;GO:1901360//organic cyclic compound metabolic process;GO:1901617//organic hydroxy compound biosynthetic process;GO:0055088//lipid homeostasis;GO:0048856//anatomical structure development;GO:0007275//multicellular organism development;GO:0071704//organic substance metabolic process;GO:0042445//hormone metabolic process;GO:0042592//homeostatic process;GO:001613…	NP_001234263.1|8.7e-273|6-deoxocastasterone oxidase isoform 1 [Solanum lycopersicum]
Solyc05g051460.3	1.42688	3.8142e-65	K09338//homeobox-leucine zipper protein	GO:0043231//intracellular membrane-bounded organelle;GO:0043227//membrane-bounded organelle;GO:0043226//organelle;GO:0044424//intracellular part;GO:0043229//intracellular organelle;GO:0005634//nucleus;GO:0005622//intracellular;GO:0044464//cell part;GO:0005623//cell;GO:0140110//transcription regulator activity;GO:0005488//binding;GO:0003677//DNA binding;GO:0097159//organic cyclic compound binding;…	XP_004240025.1|2.6e-179|PREDICTED: homeobox-leucine zipper protein ATHB-6 [Solanum lycopersicum]
Solyc12g077370.2	1.42585	1.67639e-07	K07198//5'-AMP-activated protein kinase, catalytic alpha subunit [EC:2.7.11.11]	GO:0007154//cell communication;GO:0009987//cellular process;GO:0065007//biological regulation;GO:0007165//signal transduction;GO:0051716//cellular response to stimulus;GO:0050794//regulation of cellular process;GO:0023052//signaling;GO:0050789//regulation of biological process;GO:0050896//response to stimulus;GO:0016740//transferase activity;GO:0016301//kinase activity;GO:0008144//drug binding;GO…	XP_004252694.1|1.6e-278|PREDICTED: CBL-interacting serine/threonine-protein kinase 5-like [Solanum lycopersicum]
Solyc03g083730.1	1.42235	2.49571e-254	K01051//pectinesterase [EC:3.1.1.11]+ko00040//Pentose and glucuronate interconversions+ko01100//Metabolic pathways	GO:0098772//molecular function regulator;GO:0030234//enzyme regulator activity;GO:0004857//enzyme inhibitor activity;	XP_004234935.1|4.0e-106|PREDICTED: 21 kDa protein-like [Solanum lycopersicum]
Solyc08g007460.2	1.42154	1.46111e-17		GO:0016020//membrane;GO:0044425//membrane part;GO:0031224//intrinsic component of membrane;GO:0016021//integral component of membrane;	XP_004244575.1|4.4e-83|PREDICTED: protein YLS3-like [Solanum lycopersicum]
Solyc09g092280.1	1.42152	1.37421e-05	K13457//disease resistance protein RPM1+ko04626//Plant-pathogen interaction	GO:0050789//regulation of biological process;GO:0006952//defense response;GO:0009987//cellular process;GO:0007154//cell communication;GO:0050896//response to stimulus;GO:0007165//signal transduction;GO:0023052//signaling;GO:0006950//response to stress;GO:0051716//cellular response to stimulus;GO:0050794//regulation of cellular process;GO:0065007//biological regulation;GO:0005886//plasma membrane;…	XP_004247879.1|0.0e+00|PREDICTED: disease resistance protein RPP13-like [Solanum lycopersicum]
Solyc11g005480.2	1.42135	2.72018e-06	K14948//polypyrimidine tract-binding protein 2		XP_004249877.1|2.8e-123|PREDICTED: citrate-binding protein-like [Solanum lycopersicum]
Solyc06g051620.3	1.42045	3.29111e-87	K05857//phosphatidylinositol phospholipase C, delta [EC:3.1.4.11]+ko01100//Metabolic pathways+ko04933//AGE-RAGE signaling pathway in diabetic complications+ko04070//Phosphatidylinositol signaling system+ko00562//Inositol phosphate metabolism	GO:1901575//organic substance catabolic process;GO:0016042//lipid catabolic process;GO:0050896//response to stimulus;GO:0007154//cell communication;GO:0050794//regulation of cellular process;GO:0009987//cellular process;GO:0009056//catabolic process;GO:0051716//cellular response to stimulus;GO:0050789//regulation of biological process;GO:0008152//metabolic process;GO:0044238//primary metabolic pr…	XP_015078474.1|0.0e+00|PREDICTED: uncharacterized protein LOC107022350 [Solanum pennellii]
Solyc04g016420.3	1.41699	2.08682e-07	K00279//cytokinin dehydrogenase [EC:1.5.99.12]+ko00908//Zeatin biosynthesis	GO:0071704//organic substance metabolic process;GO:0065008//regulation of biological quality;GO:1901564//organonitrogen compound metabolic process;GO:0009987//cellular process;GO:0006725//cellular aromatic compound metabolic process;GO:0042445//hormone metabolic process;GO:0006807//nitrogen compound metabolic process;GO:0046483//heterocycle metabolic process;GO:0010817//regulation of hormone leve…	NP_001244907.1|9.4e-122|cytokinin oxidase/dehydrogenase-like 5 precursor [Solanum lycopersicum]
Solyc01g105410.3	1.41639	1.35353e-222	K00020//3-hydroxyisobutyrate dehydrogenase [EC:1.1.1.31]+ko00280//Valine, leucine and isoleucine degradation+ko01100//Metabolic pathways;K14299//nucleoporin SEH1+ko03013//RNA transport		XP_015074412.1|1.3e-160|PREDICTED: protein EXORDIUM-like 2 [Solanum pennellii]
Solyc02g091700.3	1.41466	2.10817e-44		GO:0044425//membrane part;GO:0016020//membrane;GO:0016021//integral component of membrane;GO:0031224//intrinsic component of membrane;	XP_004231969.1|9.5e-87|PREDICTED: uncharacterized protein At5g65660 [Solanum lycopersicum]
Solyc02g070020.1	1.41116	3.55212e-10	K18823//soyasaponin III rhamnosyltransferase [EC:2.4.1.273]	GO:0008152//metabolic process;GO:0043231//intracellular membrane-bounded organelle;GO:0031224//intrinsic component of membrane;GO:0043229//intracellular organelle;GO:0044425//membrane part;GO:0044444//cytoplasmic part;GO:0044424//intracellular part;GO:0005829//cytosol;GO:0043227//membrane-bounded organelle;GO:0005623//cell;GO:0005737//cytoplasm;GO:0016021//integral component of membrane;GO:004322…	XP_004233155.1|7.3e-284|PREDICTED: UDP-glycosyltransferase 91C1-like [Solanum lycopersicum]
Solyc05g009010.1	1.41027	4.80226e-52	K04733//interleukin-1 receptor-associated kinase 4 [EC:2.7.11.1]	GO:0031224//intrinsic component of membrane;GO:0016020//membrane;GO:0044425//membrane part;GO:0016021//integral component of membrane;GO:0030554//adenyl nucleotide binding;GO:0016301//kinase activity;GO:0004672//protein kinase activity;GO:0000166//nucleotide binding;GO:0032553//ribonucleotide binding;GO:0003824//catalytic activity;GO:0032559//adenyl ribonucleotide binding;GO:0008144//drug binding…	XP_004238904.1|1.6e-172|PREDICTED: LEAF RUST 10 DISEASE-RESISTANCE LOCUS RECEPTOR-LIKE PROTEIN KINASE-like 1.1 [Solanum lycopersicum]
Solyc03g115930.2	1.4072	9.03292e-10	K02183//calmodulin+ko04016//MAPK signaling pathway - plant+ko04626//Plant-pathogen interaction+ko04070//Phosphatidylinositol signaling system;K16465//centrin-1	GO:0043169//cation binding;GO:0005488//binding;GO:0005509//calcium ion binding;GO:0046872//metal ion binding;GO:0043167//ion binding;	XP_004236035.1|7.7e-93|PREDICTED: probable calcium-binding protein CML30 [Solanum lycopersicum]
Solyc06g036420.2	1.4072	0.000126151	K12795//suppressor of G2 allele of SKP1+ko04626//Plant-pathogen interaction		XP_019069759.1|9.2e-210|PREDICTED: protein SGT1 homolog A-like [Solanum lycopersicum]
Solyc08g068710.1	1.40674	1.51557e-26	K22246//tyramine N-feruloyltransferase [EC:2.3.1.110]	GO:0044238//primary metabolic process;GO:0043436//oxoacid metabolic process;GO:0006520//cellular amino acid metabolic process;GO:0044281//small molecule metabolic process;GO:0019752//carboxylic acid metabolic process;GO:0044237//cellular metabolic process;GO:0006591//ornithine metabolic process;GO:0071704//organic substance metabolic process;GO:0009987//cellular process;GO:1901605//alpha-amino ac…	XP_004245284.1|4.0e-134|PREDICTED: tyramine N-feruloyltransferase 4/11-like [Solanum lycopersicum]
Solyc01g080800.3	1.40674	1.24509e-13			XP_004229501.1|3.2e-101|PREDICTED: uncharacterized protein LOC101249488 [Solanum lycopersicum]
Solyc12g006860.2	1.4067	3.22387e-36	K15639//PHYB activation tagged suppressor 1 [EC:1.14.-.-]+ko00905//Brassinosteroid biosynthesis	GO:0065007//biological regulation;GO:0016131//brassinosteroid metabolic process;GO:0048878//chemical homeostasis;GO:0016128//phytosteroid metabolic process;GO:0055088//lipid homeostasis;GO:0008202//steroid metabolic process;GO:0008152//metabolic process;GO:0065008//regulation of biological quality;GO:0009741//response to brassinosteroid;GO:0033993//response to lipid;GO:0042445//hormone metabolic …	NP_001234737.2|0.0e+00|putative brassinosteroid hydroxylase [Solanum lycopersicum]
Solyc02g063020.2	1.40646	2.55624e-16		GO:0051234//establishment of localization;GO:0051179//localization;GO:0055085//transmembrane transport;GO:0006810//transport;GO:0016020//membrane;GO:0044425//membrane part;GO:0031224//intrinsic component of membrane;GO:0016021//integral component of membrane;	XP_004233504.1|7.9e-269|PREDICTED: protein spinster-like [Solanum lycopersicum]
Solyc11g072570.2	1.40095	8.58239e-07	K14638//solute carrier family 15 (peptide/histidine transporter), member 3/4	GO:0015833//peptide transport;GO:0006857//oligopeptide transport;GO:0042886//amide transport;GO:0071705//nitrogen compound transport;GO:0071702//organic substance transport;GO:0051179//localization;GO:0006810//transport;GO:0051234//establishment of localization;GO:0016021//integral component of membrane;GO:0044425//membrane part;GO:0016020//membrane;GO:0031224//intrinsic component of membrane;GO:…	XP_004251278.1|0.0e+00|PREDICTED: protein NRT1/ PTR FAMILY 2.7-like [Solanum lycopersicum]
Solyc09g075910.1	1.39906	4.9152e-42	K04733//interleukin-1 receptor-associated kinase 4 [EC:2.7.11.1]	GO:0006793//phosphorus metabolic process;GO:0006796//phosphate-containing compound metabolic process;GO:0044237//cellular metabolic process;GO:0048544//recognition of pollen;GO:0043170//macromolecule metabolic process;GO:0007154//cell communication;GO:0044260//cellular macromolecule metabolic process;GO:0036211//protein modification process;GO:0019538//protein metabolic process;GO:0044238//primar…	XP_004247525.1|0.0e+00|PREDICTED: G-type lectin S-receptor-like serine/threonine-protein kinase LECRK4 [Solanum lycopersicum]
Solyc07g040710.3	1.39571	0.000320433	K04733//interleukin-1 receptor-associated kinase 4 [EC:2.7.11.1];K01214//isoamylase [EC:3.2.1.68]+ko01100//Metabolic pathways+ko00500//Starch and sucrose metabolism+ko01110//Biosynthesis of secondary metabolites;K06892//feruloyl-CoA ortho-hydroxylase [EC:1.14.11.-]+ko01110//Biosynthesis of secondary metabolites+ko00940//Phenylpropanoid biosynthesis		XP_015081689.1|1.7e-281|PREDICTED: IQ domain-containing protein IQM1-like [Solanum pennellii]
Solyc01g091470.3	1.39308	7.12298e-05	K23047//E3 ubiquitin-protein ligase UNKL [EC:2.3.2.27]	GO:0044249//cellular biosynthetic process;GO:0032774//RNA biosynthetic process;GO:0034645//cellular macromolecule biosynthetic process;GO:0018130//heterocycle biosynthetic process;GO:0016070//RNA metabolic process;GO:0071704//organic substance metabolic process;GO:1901576//organic substance biosynthetic process;GO:0009059//macromolecule biosynthetic process;GO:0097659//nucleic acid-templated tran…	XP_004229823.1|9.1e-175|PREDICTED: AT-hook motif nuclear-localized protein 22 [Solanum lycopersicum]
Solyc01g006950.3	1.3921	3.27688e-09	K08486//syntaxin 1B/2/3+ko04130//SNARE interactions in vesicular transport	GO:0006996//organelle organization;GO:0022406//membrane docking;GO:0051649//establishment of localization in cell;GO:0033036//macromolecule localization;GO:0032940//secretion by cell;GO:0070727//cellular macromolecule localization;GO:0071705//nitrogen compound transport;GO:0006887//exocytosis;GO:0006906//vesicle fusion;GO:0042886//amide transport;GO:0051641//cellular localization;GO:0006810//tran…	XP_004228675.1|3.3e-165|PREDICTED: syntaxin-121-like [Solanum lycopersicum]
Solyc03g111793.1	1.39171	4.94707e-97	K04733//interleukin-1 receptor-associated kinase 4 [EC:2.7.11.1]	GO:0031224//intrinsic component of membrane;GO:0016021//integral component of membrane;GO:0044425//membrane part;GO:0016020//membrane;GO:0016301//kinase activity;GO:0016773//phosphotransferase activity, alcohol group as acceptor;GO:0008144//drug binding;GO:1901363//heterocyclic compound binding;GO:0016740//transferase activity;GO:0003824//catalytic activity;GO:0097367//carbohydrate derivative bin…	NP_001306257.1|0.0e+00|leucine-rich repeat receptor-like serine/threonine/tyrosine-protein kinase SOBIR1 precursor [Solanum lycopersicum]
Solyc01g106500.3	1.39126	1.53119e-18	K00924//kinase [EC:2.7.1.-]	GO:0031224//intrinsic component of membrane;GO:0016021//integral component of membrane;GO:0044425//membrane part;GO:0016020//membrane;GO:0000166//nucleotide binding;GO:0016740//transferase activity;GO:0030554//adenyl nucleotide binding;GO:0097367//carbohydrate derivative binding;GO:0097159//organic cyclic compound binding;GO:0004672//protein kinase activity;GO:0032553//ribonucleotide binding;GO:0…	XP_004230660.1|0.0e+00|PREDICTED: receptor-like protein kinase HAIKU2 [Solanum lycopersicum]
Solyc03g020060.3	1.38632	2.07325e-16		GO:0004867//serine-type endopeptidase inhibitor activity;GO:0004857//enzyme inhibitor activity;GO:0061134//peptidase regulator activity;GO:0061135//endopeptidase regulator activity;GO:0030234//enzyme regulator activity;GO:0030414//peptidase inhibitor activity;GO:0004866//endopeptidase inhibitor activity;GO:0098772//molecular function regulator;	NP_001311403.1|1.2e-126|proteinase inhibitor type-2 precursor [Solanum lycopersicum]
Solyc05g008820.3	1.38361	6.07554e-15	K18693//diacylglycerol diphosphate phosphatase / phosphatidate phosphatase [EC:3.1.3.81 3.1.3.4]+ko01110//Biosynthesis of secondary metabolites+ko00564//Glycerophospholipid metabolism+ko00561//Glycerolipid metabolism	GO:0031224//intrinsic component of membrane;GO:0016021//integral component of membrane;GO:0016020//membrane;GO:0044425//membrane part;GO:0003824//catalytic activity;GO:0016787//hydrolase activity;GO:0016791//phosphatase activity;GO:0016788//hydrolase activity, acting on ester bonds;GO:0008195//phosphatidate phosphatase activity;GO:0042578//phosphoric ester hydrolase activity;	XP_010320737.1|4.0e-184|PREDICTED: lipid phosphate phosphatase 2 isoform X1 [Solanum lycopersicum]
Solyc10g052650.2	1.38268	3.8062e-45			XP_004248707.1|9.6e-134|PREDICTED: F-box protein At2g16365 [Solanum lycopersicum]
Solyc01g105180.3	1.38204	3.67157e-13	K17964//leucine-rich PPR motif-containing protein, mitochondrial		XP_004230566.1|2.3e-231|PREDICTED: protein DA1 isoform X2 [Solanum lycopersicum]
Solyc09g075920.1	1.38198	6.13428e-29	K00276//primary-amine oxidase [EC:1.4.3.21]+ko00410//beta-Alanine metabolism+ko00960//Tropane, piperidine and pyridine alkaloid biosynthesis+ko00350//Tyrosine metabolism+ko01100//Metabolic pathways+ko00950//Isoquinoline alkaloid biosynthesis+ko01110//Biosynthesis of secondary metabolites+ko00260//Glycine, serine and threonine metabolism+ko00360//Phenylalanine metabolism;K04733//interleukin-1 rece…	GO:0009987//cellular process;GO:0051704//multi-organism process;GO:0009856//pollination;GO:0008037//cell recognition;GO:0006807//nitrogen compound metabolic process;GO:0022414//reproductive process;GO:0000003//reproduction;GO:0032501//multicellular organismal process;GO:0009875//pollen-pistil interaction;GO:1901564//organonitrogen compound metabolic process;GO:0007154//cell communication;GO:00093…	XP_019071128.1|0.0e+00|PREDICTED: uncharacterized protein LOC101254423 [Solanum lycopersicum]
Solyc07g063240.3	1.38002	1.66255e-271	K15377//solute carrier family 44 (choline transporter-like protein), member 2/4/5		XP_010324361.1|8.2e-229|PREDICTED: uncharacterized LOC101252606 isoform X2 [Solanum lycopersicum]
Solyc01g079260.3	1.37936	5.85447e-71	K12835//ATP-dependent RNA helicase DDX42 [EC:3.6.4.13]+ko03040//Spliceosome;K18835//WRKY transcription factor 2+ko04626//Plant-pathogen interaction	GO:0006139//nucleobase-containing compound metabolic process;GO:0046483//heterocycle metabolic process;GO:1901360//organic cyclic compound metabolic process;GO:0032774//RNA biosynthetic process;GO:0090304//nucleic acid metabolic process;GO:0044260//cellular macromolecule metabolic process;GO:0010467//gene expression;GO:0009987//cellular process;GO:0044249//cellular biosynthetic process;GO:0043170…	XP_004229377.1|5.1e-189|PREDICTED: probable WRKY transcription factor 23 [Solanum lycopersicum]
Solyc00g272810.1	1.3791	0	K22883//L-ornithine N5-acetyltransferase [EC:2.3.1.-]	GO:0016746//transferase activity, transferring acyl groups;GO:0003824//catalytic activity;GO:0016747//transferase activity, transferring acyl groups other than amino-acyl groups;GO:0008080//N-acetyltransferase activity;GO:0016410//N-acyltransferase activity;GO:0016740//transferase activity;GO:0016407//acetyltransferase activity;	XP_004253515.1|3.0e-137|PREDICTED: probable acetyltransferase NATA1-like [Solanum lycopersicum]
Solyc07g066560.1	1.37766	3.10983e-13	K14488//SAUR family protein+ko04075//Plant hormone signal transduction	GO:0010033//response to organic substance;GO:0050896//response to stimulus;GO:0009733//response to auxin;GO:0009719//response to endogenous stimulus;GO:0042221//response to chemical;GO:0009725//response to hormone;	XP_004243973.1|1.2e-63|PREDICTED: auxin-responsive protein SAUR71 [Solanum lycopersicum]
Solyc02g090740.3	1.37673	3.50828e-41	K03327//multidrug resistance protein, MATE family	GO:0016020//membrane;GO:0044425//membrane part;GO:0016021//integral component of membrane;GO:0031224//intrinsic component of membrane;GO:0022804//active transmembrane transporter activity;GO:0015291//secondary active transmembrane transporter activity;GO:0022857//transmembrane transporter activity;GO:0015238//drug transmembrane transporter activity;GO:0015297//antiporter activity;GO:0005215//tran…	XP_015067179.1|1.5e-285|PREDICTED: protein DETOXIFICATION 48-like [Solanum pennellii]
Solyc11g018805.1	1.37658	9.91476e-154	K00430//peroxidase [EC:1.11.1.7]+ko01100//Metabolic pathways+ko01110//Biosynthesis of secondary metabolites+ko00940//Phenylpropanoid biosynthesis		XP_015057952.1|5.4e-176|PREDICTED: lignin-forming anionic peroxidase [Solanum pennellii]
Solyc09g075330.3	1.37316	4.18853e-09	K01051//pectinesterase [EC:3.1.1.11]+ko00040//Pentose and glucuronate interconversions+ko01100//Metabolic pathways	GO:0043170//macromolecule metabolic process;GO:0042545//cell wall modification;GO:0016043//cellular component organization;GO:0044238//primary metabolic process;GO:0071554//cell wall organization or biogenesis;GO:0071840//cellular component organization or biogenesis;GO:0005975//carbohydrate metabolic process;GO:0000272//polysaccharide catabolic process;GO:0071555//cell wall organization;GO:00099…	XP_004247401.1|0.0e+00|PREDICTED: probable pectinesterase/pectinesterase inhibitor 7 [Solanum lycopersicum]
Solyc08g016440.3	1.37158	1.29201e-27
Solyc08g068730.1	1.37068	2.91405e-31	K22246//tyramine N-feruloyltransferase [EC:2.3.1.110]	GO:0044237//cellular metabolic process;GO:1901605//alpha-amino acid metabolic process;GO:0043436//oxoacid metabolic process;GO:0044238//primary metabolic process;GO:0006082//organic acid metabolic process;GO:0006807//nitrogen compound metabolic process;GO:0009987//cellular process;GO:0071704//organic substance metabolic process;GO:0044281//small molecule metabolic process;GO:1901564//organonitrog…	NP_001234877.1|8.2e-132|N-hydroxycinnamoyl-CoA:tyramine N-hydroxycinnamoyl transferase THT1-3 [Solanum lycopersicum]
Solyc11g018777.1	1.36769	0	K00430//peroxidase [EC:1.11.1.7]+ko01100//Metabolic pathways+ko01110//Biosynthesis of secondary metabolites+ko00940//Phenylpropanoid biosynthesis		XP_015057952.1|1.1e-172|PREDICTED: lignin-forming anionic peroxidase [Solanum pennellii]
Solyc04g015460.3	1.36734	2.48619e-13	K04733//interleukin-1 receptor-associated kinase 4 [EC:2.7.11.1]	GO:0016020//membrane;GO:0016021//integral component of membrane;GO:0044425//membrane part;GO:0031224//intrinsic component of membrane;GO:0016773//phosphotransferase activity, alcohol group as acceptor;GO:0032555//purine ribonucleotide binding;GO:0016740//transferase activity;GO:0036094//small molecule binding;GO:0008144//drug binding;GO:0030554//adenyl nucleotide binding;GO:0005524//ATP binding;G…	XP_004237111.1|0.0e+00|PREDICTED: G-type lectin S-receptor-like serine/threonine-protein kinase At5g35370 [Solanum lycopersicum]
Solyc12g096710.2	1.36719	1.99958e-61	K04733//interleukin-1 receptor-associated kinase 4 [EC:2.7.11.1]	GO:0016021//integral component of membrane;GO:0044425//membrane part;GO:0016020//membrane;GO:0031224//intrinsic component of membrane;GO:0032555//purine ribonucleotide binding;GO:0043168//anion binding;GO:0032559//adenyl ribonucleotide binding;GO:0016740//transferase activity;GO:0035639//purine ribonucleoside triphosphate binding;GO:0097159//organic cyclic compound binding;GO:0016772//transferase…	XP_019067246.1|0.0e+00|PREDICTED: probably inactive leucine-rich repeat receptor-like protein kinase At5g48380 [Solanum lycopersicum]
Solyc09g008010.3	1.36712	1.25897e-77	K04733//interleukin-1 receptor-associated kinase 4 [EC:2.7.11.1]	GO:0043412//macromolecule modification;GO:0071704//organic substance metabolic process;GO:0007154//cell communication;GO:0006468//protein phosphorylation;GO:0006796//phosphate-containing compound metabolic process;GO:0007166//cell surface receptor signaling pathway;GO:0009987//cellular process;GO:0050789//regulation of biological process;GO:0006464//cellular protein modification process;GO:004426…	XP_004246645.1|4.4e-249|PREDICTED: probable receptor-like protein kinase At5g47070 isoform X1 [Solanum lycopersicum]
Solyc08g062490.3	1.36651	3.25794e-16	K13424//WRKY transcription factor 33+ko04016//MAPK signaling pathway - plant+ko04626//Plant-pathogen interaction	GO:0009059//macromolecule biosynthetic process;GO:0071704//organic substance metabolic process;GO:0044260//cellular macromolecule metabolic process;GO:1901576//organic substance biosynthetic process;GO:0010033//response to organic substance;GO:0051704//multi-organism process;GO:0071495//cellular response to endogenous stimulus;GO:0009605//response to external stimulus;GO:0050794//regulation of ce…	XP_004245065.1|2.7e-102|PREDICTED: probable WRKY transcription factor 75 [Solanum lycopersicum]
Solyc07g053120.3	1.36597	1.1607e-148	K04733//interleukin-1 receptor-associated kinase 4 [EC:2.7.11.1]	GO:0009875//pollen-pistil interaction;GO:0032501//multicellular organismal process;GO:0000003//reproduction;GO:0044706//multi-multicellular organism process;GO:0022414//reproductive process;GO:0048544//recognition of pollen;GO:0009856//pollination;GO:0009987//cellular process;GO:0008037//cell recognition;GO:0007154//cell communication;GO:0051704//multi-organism process;GO:0016020//membrane;GO:001…	XP_010323783.1|2.7e-301|PREDICTED: G-type lectin S-receptor-like serine/threonine-protein kinase At4g03230 isoform X1 [Solanum lycopersicum]
Solyc01g005865.1	1.36574	1.84189e-06	K13023//carboxypeptidase N regulatory subunit;K20718//LRR receptor-like serine/threonine-protein kinase ERECTA [EC:2.7.11.1]+ko04016//MAPK signaling pathway - plant;K19613//leucine-rich repeat protein SHOC2		AMN14932.1|2.6e-58|Cf-like protein [Solanum lycopersicum]
Solyc07g043250.1	1.36513	2.61929e-27			XP_010323951.1|6.6e-88|PREDICTED: VQ motif-containing protein 22 [Solanum lycopersicum]
Solyc11g030730.2	1.36267	0.000339844	K20623//typhasterol/6-deoxotyphasterol 2alpha-hydroxylase+ko00905//Brassinosteroid biosynthesis+ko01100//Metabolic pathways+ko01110//Biosynthesis of secondary metabolites	GO:0019748//secondary metabolic process;GO:0044550//secondary metabolite biosynthetic process;GO:0008152//metabolic process;GO:0009058//biosynthetic process;GO:0016020//membrane;GO:0005488//binding;GO:0097159//organic cyclic compound binding;GO:0046872//metal ion binding;GO:0016705//oxidoreductase activity, acting on paired donors, with incorporation or reduction of molecular oxygen;GO:1901363//h…	XP_004250647.1|2.0e-298|PREDICTED: flavonoid 3'-monooxygenase-like [Solanum lycopersicum]
Solyc02g093250.3	1.36151	2.1951e-32	K00588//caffeoyl-CoA O-methyltransferase [EC:2.1.1.104]+ko01100//Metabolic pathways+ko01110//Biosynthesis of secondary metabolites+ko00940//Phenylpropanoid biosynthesis+ko00941//Flavonoid biosynthesis+ko00945//Stilbenoid, diarylheptanoid and gingerol biosynthesis+ko00360//Phenylalanine metabolism	GO:0071704//organic substance metabolic process;GO:0019748//secondary metabolic process;GO:0009808//lignin metabolic process;GO:0009987//cellular process;GO:0006725//cellular aromatic compound metabolic process;GO:0009699//phenylpropanoid biosynthetic process;GO:0009698//phenylpropanoid metabolic process;GO:0044237//cellular metabolic process;GO:0019438//aromatic compound biosynthetic process;GO:…	XP_004231856.1|8.6e-137|PREDICTED: caffeoyl-CoA O-methyltransferase [Solanum lycopersicum]
Solyc05g054750.3	1.35938	1.78438e-37	K01513//ectonucleotide pyrophosphatase/phosphodiesterase family member 1/3 [EC:3.1.4.1 3.6.1.9]+ko00740//Riboflavin metabolism+ko00230//Purine metabolism+ko00770//Pantothenate and CoA biosynthesis+ko01100//Metabolic pathways+ko00760//Nicotinate and nicotinamide metabolism+ko00500//Starch and sucrose metabolism+ko00240//Pyrimidine metabolism		XP_015075204.1|1.7e-46|PREDICTED: uncharacterized protein LOC107019144 isoform X1 [Solanum pennellii]
Solyc09g083360.3	1.35925	3.91078e-65	K02958//small subunit ribosomal protein S15e+ko03010//Ribosome	GO:0046983//protein dimerization activity;GO:0005515//protein binding;GO:0005488//binding;	XP_004247648.1|1.1e-128|PREDICTED: transcription factor bHLH92 [Solanum lycopersicum]
Solyc03g005670.3	1.35918	9.48168e-09	K19613//leucine-rich repeat protein SHOC2;K13457//disease resistance protein RPM1+ko04626//Plant-pathogen interaction	GO:0050896//response to stimulus;GO:0006952//defense response;GO:0006950//response to stress;GO:0032555//purine ribonucleotide binding;GO:0005488//binding;GO:0097367//carbohydrate derivative binding;GO:0017076//purine nucleotide binding;GO:0032559//adenyl ribonucleotide binding;GO:0032553//ribonucleotide binding;GO:0036094//small molecule binding;GO:0030554//adenyl nucleotide binding;GO:0043168//…	XP_004234047.1|0.0e+00|PREDICTED: probable disease resistance protein At1g58602 [Solanum lycopersicum]
Solyc03g078630.3	1.35913	2.70609e-68	K08770//ubiquitin C		XP_004235058.1|3.7e-114|PREDICTED: polyubiquitin-like [Solanum lycopersicum]
Solyc05g013750.3	1.35767	1.18116e-121	K10999//cellulose synthase A [EC:2.4.1.12];K04459//dual specificity MAP kinase phosphatase [EC:3.1.3.16 3.1.3.48]	GO:0004725//protein tyrosine phosphatase activity;GO:0004721//phosphoprotein phosphatase activity;GO:0008092//cytoskeletal protein binding;GO:0140096//catalytic activity, acting on a protein;GO:0016772//transferase activity, transferring phosphorus-containing groups;GO:0051015//actin filament binding;GO:0044877//protein-containing complex binding;GO:0042578//phosphoric ester hydrolase activity;GO…	XP_004239146.1|0.0e+00|PREDICTED: protein-tyrosine-phosphatase MKP1-like [Solanum lycopersicum]
Solyc05g018230.3	1.35615	1.87649e-96	K08150//MFS transporter, SP family, solute carrier family 2 (myo-inositol transporter), member 13	GO:0008643//carbohydrate transport;GO:0051179//localization;GO:0051234//establishment of localization;GO:0071702//organic substance transport;GO:0006810//transport;GO:0016020//membrane;GO:0016021//integral component of membrane;GO:0044425//membrane part;GO:0031224//intrinsic component of membrane;	XP_009610479.1|8.0e-286|PREDICTED: sugar transport protein 14-like isoform X1 [Nicotiana tomentosiformis]
Solyc06g060760.3	1.35511	9.58193e-69	K09873//aquaporin TIP	GO:0055085//transmembrane transport;GO:0051179//localization;GO:0051234//establishment of localization;GO:0034220//ion transmembrane transport;GO:0006810//transport;GO:0006811//ion transport;GO:0044425//membrane part;GO:0042807//central vacuole;GO:0009705//plant-type vacuole membrane;GO:0005773//vacuole;GO:0044424//intracellular part;GO:0031090//organelle membrane;GO:0005737//cytoplasm;GO:0044444…	NP_001274703.1|5.3e-137|TIP protein [Solanum lycopersicum]
Solyc05g009340.1	1.35474	7.10736e-06			XP_010320766.1|1.4e-66|PREDICTED: uncharacterized protein LOC104647284 [Solanum lycopersicum]
Solyc03g007960.3	1.35274	4.57633e-17	K15746//beta-carotene 3-hydroxylase [EC:1.14.15.24]+ko00906//Carotenoid biosynthesis+ko01100//Metabolic pathways+ko01110//Biosynthesis of secondary metabolites	GO:0044238//primary metabolic process;GO:0008152//metabolic process;GO:0009058//biosynthetic process;GO:0008610//lipid biosynthetic process;GO:0006629//lipid metabolic process;GO:1901576//organic substance biosynthetic process;GO:0071704//organic substance metabolic process;GO:0031224//intrinsic component of membrane;GO:0016020//membrane;GO:0044425//membrane part;GO:0016021//integral component of…	NP_001265981.1|4.5e-179|beta-carotene hydroxylase [Solanum lycopersicum]
Solyc04g007070.3	1.35221	0	K13457//disease resistance protein RPM1+ko04626//Plant-pathogen interaction	GO:0023052//signaling;GO:0065007//biological regulation;GO:0006952//defense response;GO:0007165//signal transduction;GO:0009987//cellular process;GO:0050789//regulation of biological process;GO:0006950//response to stress;GO:0050794//regulation of cellular process;GO:0007154//cell communication;GO:0050896//response to stimulus;GO:0051716//cellular response to stimulus;GO:0005886//plasma membrane;…	XP_004236958.1|0.0e+00|PREDICTED: putative late blight resistance protein homolog R1B-23 [Solanum lycopersicum]
Solyc05g052210.3	1.34987	3.19376e-18		GO:0016021//integral component of membrane;GO:0044425//membrane part;GO:0016020//membrane;GO:0031224//intrinsic component of membrane;	XP_004239972.1|1.1e-154|PREDICTED: uncharacterized protein LOC101266516 isoform X1 [Solanum lycopersicum]
Solyc02g077000.3	1.34765	0.000121158	K00145//N-acetyl-gamma-glutamyl-phosphate reductase [EC:1.2.1.38]+ko00220//Arginine biosynthesis+ko01230//Biosynthesis of amino acids+ko01100//Metabolic pathways+ko01110//Biosynthesis of secondary metabolites+ko01210//2-Oxocarboxylic acid metabolism	GO:0044238//primary metabolic process;GO:0006629//lipid metabolic process;GO:0008152//metabolic process;GO:0071704//organic substance metabolic process;GO:0052689//carboxylic ester hydrolase activity;GO:0016787//hydrolase activity;GO:0003824//catalytic activity;GO:0004620//phospholipase activity;GO:0008970//phospholipase A1 activity;GO:0016788//hydrolase activity, acting on ester bonds;GO:0016298…	XP_004232965.1|2.9e-231|PREDICTED: phospholipase A1-IIgamma-like [Solanum lycopersicum]
Solyc01g079940.3	1.34634	0	K22683//aspartyl protease family protein [EC:3.4.23.-]	GO:1901564//organonitrogen compound metabolic process;GO:1901575//organic substance catabolic process;GO:0019538//protein metabolic process;GO:0009056//catabolic process;GO:0008152//metabolic process;GO:0009057//macromolecule catabolic process;GO:0006508//proteolysis;GO:0044238//primary metabolic process;GO:0030163//protein catabolic process;GO:0043170//macromolecule metabolic process;GO:0006807/…	XP_004229430.1|2.1e-251|PREDICTED: basic 7S globulin-like [Solanum lycopersicum]
Solyc01g006680.3	1.34463	5.76481e-33	K10277//lysine-specific demethylase 8 [EC:1.14.11.27]	GO:0051276//chromosome organization;GO:0050789//regulation of biological process;GO:0065007//biological regulation;GO:0016043//cellular component organization;GO:1901564//organonitrogen compound metabolic process;GO:0048511//rhythmic process;GO:0036211//protein modification process;GO:0044267//cellular protein metabolic process;GO:0016570//histone modification;GO:0009987//cellular process;GO:0071…	NP_001306150.1|1.2e-227|JmjC-domain protein JMJ524 [Solanum lycopersicum]
Solyc01g090430.3	1.33991	9.17898e-215	K13457//disease resistance protein RPM1+ko04626//Plant-pathogen interaction;K13453//disease resistance protein+ko04626//Plant-pathogen interaction	GO:0050789//regulation of biological process;GO:0023052//signaling;GO:0050896//response to stimulus;GO:0007165//signal transduction;GO:0050794//regulation of cellular process;GO:0009987//cellular process;GO:0051716//cellular response to stimulus;GO:0065007//biological regulation;GO:0006952//defense response;GO:0006950//response to stress;GO:0007154//cell communication;GO:0016020//membrane;GO:0005…	NP_001234202.1|0.0e+00|NRC1 [Solanum lycopersicum]
Solyc02g079330.3	1.33939	1.73567e-11	K15014//solute carrier family 29 (equilibrative nucleoside transporter), member 1/2/3	GO:0044425//membrane part;GO:0016020//membrane;GO:0016021//integral component of membrane;GO:0031224//intrinsic component of membrane;GO:0005337//nucleoside transmembrane transporter activity;GO:0022857//transmembrane transporter activity;GO:0005215//transporter activity;GO:1901505//carbohydrate derivative transmembrane transporter activity;GO:0015932//nucleobase-containing compound transmembrane…	XP_015064155.1|2.4e-240|PREDICTED: equilibrative nucleotide transporter 3-like [Solanum pennellii]
Solyc07g064720.3	1.33681	2.48694e-19	K00679//phospholipid:diacylglycerol acyltransferase [EC:2.3.1.158]+ko01100//Metabolic pathways+ko00561//Glycerolipid metabolism;K14209//solute carrier family 36 (proton-coupled amino acid transporter);K10691//E3 ubiquitin-protein ligase UBR4 [EC:2.3.2.27];K01188//beta-glucosidase [EC:3.2.1.21]+ko01100//Metabolic pathways+ko00500//Starch and sucrose metabolism+ko01110//Biosynthesis of secondary me…	GO:0003824//catalytic activity;GO:0016788//hydrolase activity, acting on ester bonds;GO:0016787//hydrolase activity;	XP_004244106.2|6.6e-204|PREDICTED: GDSL esterase/lipase At5g55050-like [Solanum lycopersicum]
Solyc09g014480.2	1.33517	1.79507e-284	K20718//LRR receptor-like serine/threonine-protein kinase ERECTA [EC:2.7.11.1]+ko04016//MAPK signaling pathway - plant		XP_004246328.1|1.5e-176|PREDICTED: polygalacturonase inhibitor [Solanum lycopersicum]
Solyc12g017460.1	1.33249	0	K01206//alpha-L-fucosidase [EC:3.2.1.51]+ko00511//Other glycan degradation	GO:0003824//catalytic activity;GO:0016788//hydrolase activity, acting on ester bonds;GO:0016787//hydrolase activity;	XP_004251965.1|2.3e-216|PREDICTED: GDSL esterase/lipase At5g03980-like [Solanum lycopersicum]
Solyc02g077040.4	1.33236	2.89502e-74	K01365//cathepsin L [EC:3.4.22.15]+ko04145//Phagosome;K13441//cysteine protease+ko04626//Plant-pathogen interaction;K16292//KDEL-tailed cysteine endopeptidase [EC:3.4.22.-]	GO:0006508//proteolysis;GO:0044267//cellular protein metabolic process;GO:1901564//organonitrogen compound metabolic process;GO:0043170//macromolecule metabolic process;GO:0044257//cellular protein catabolic process;GO:0044260//cellular macromolecule metabolic process;GO:0006807//nitrogen compound metabolic process;GO:0051603//proteolysis involved in cellular protein catabolic process;GO:0008152/…	NP_001233949.2|3.6e-201|phytophthora-inhibited protease 1 [Solanum lycopersicum]
Solyc06g034370.1	1.32986	1.35898e-20	K01051//pectinesterase [EC:3.1.1.11]+ko00040//Pentose and glucuronate interconversions+ko01100//Metabolic pathways	GO:0030234//enzyme regulator activity;GO:0004857//enzyme inhibitor activity;GO:0098772//molecular function regulator;	XP_004240754.1|3.3e-102|PREDICTED: 21 kDa protein-like [Solanum lycopersicum]
Solyc01g086660.2	1.32895	0.000127973			KZM96950.1|1.4e-07|hypothetical protein DCAR_015688 [Daucus carota subsp. sativus]
Solyc10g083890.2	1.32852	1.0789e-10	K01674//carbonic anhydrase [EC:4.2.1.1]+ko00910//Nitrogen metabolism	GO:0009987//cellular process;GO:0006730//one-carbon metabolic process;GO:0044281//small molecule metabolic process;GO:0044237//cellular metabolic process;GO:0008152//metabolic process;GO:0043167//ion binding;GO:0005488//binding;GO:0008270//zinc ion binding;GO:0046872//metal ion binding;GO:0046914//transition metal ion binding;GO:0004089//carbonate dehydratase activity;GO:0016835//carbon-oxygen ly…	XP_004249474.1|2.7e-156|PREDICTED: alpha carbonic anhydrase 7-like [Solanum lycopersicum]
Solyc07g040890.1	1.3282	1.46177e-10	K14493//gibberellin receptor GID1 [EC:3.-.-.-]+ko04075//Plant hormone signal transduction;K07874//Ras-related protein Rab-1A	GO:0008152//metabolic process;GO:0009056//catabolic process;GO:0003824//catalytic activity;GO:0016787//hydrolase activity;	XP_010324041.1|4.1e-193|PREDICTED: probable carboxylesterase 120 [Solanum lycopersicum]
Solyc06g062430.3	1.32777	0.000362521	K00469//inositol oxygenase [EC:1.13.99.1]+ko00053//Ascorbate and aldarate metabolism+ko00562//Inositol phosphate metabolism	GO:1901616//organic hydroxy compound catabolic process;GO:0009987//cellular process;GO:0016052//carbohydrate catabolic process;GO:0044248//cellular catabolic process;GO:1901575//organic substance catabolic process;GO:0019751//polyol metabolic process;GO:1901615//organic hydroxy compound metabolic process;GO:0006020//inositol metabolic process;GO:0044238//primary metabolic process;GO:0044237//cell…	XP_015078660.1|1.0e-180|PREDICTED: inositol oxygenase 1-like [Solanum pennellii]
Solyc06g082170.2	1.32777	0.000362521	K17479//glutaredoxin domain-containing cysteine-rich protein 1	GO:0065007//biological regulation;GO:0050789//regulation of biological process;GO:0042592//homeostatic process;GO:0065008//regulation of biological quality;GO:0045454//cell redox homeostasis;GO:0009987//cellular process;GO:0050794//regulation of cellular process;GO:0019725//cellular homeostasis;GO:0005623//cell;GO:0015035//protein disulfide oxidoreductase activity;GO:0003824//catalytic activity;G…	XP_015078668.1|1.6e-145|PREDICTED: uncharacterized protein At5g39865-like [Solanum pennellii]
Solyc03g026230.1	1.32694	1.08736e-25	K03327//multidrug resistance protein, MATE family	GO:0044425//membrane part;GO:0016020//membrane;GO:0031224//intrinsic component of membrane;GO:0016021//integral component of membrane;GO:0022804//active transmembrane transporter activity;GO:0015297//antiporter activity;GO:0005215//transporter activity;GO:0015238//drug transmembrane transporter activity;GO:0015291//secondary active transmembrane transporter activity;GO:0022857//transmembrane tran…	XP_016564706.1|7.1e-264|PREDICTED: protein DETOXIFICATION 49 [Capsicum annuum]
Solyc01g005470.3	1.3249	3.18931e-159		GO:0031224//intrinsic component of membrane;GO:0044425//membrane part;GO:0016021//integral component of membrane;GO:0016020//membrane;	XP_004228721.1|2.7e-100|PREDICTED: protein PLANT CADMIUM RESISTANCE 2 [Solanum lycopersicum]
Solyc03g046380.1	1.31771	9.79711e-07			XP_004234699.1|2.2e-39|PREDICTED: uncharacterized protein LOC101259411 [Solanum lycopersicum]
Solyc09g082220.1	1.31771	0.000575679		GO:0016407//acetyltransferase activity;GO:0016747//transferase activity, transferring acyl groups other than amino-acyl groups;GO:0016746//transferase activity, transferring acyl groups;GO:0016410//N-acyltransferase activity;GO:0008080//N-acetyltransferase activity;GO:0016740//transferase activity;GO:0003824//catalytic activity;	XP_015170461.1|1.5e-40|PREDICTED: uncharacterized N-acetyltransferase p20-like [Solanum tuberosum]
Solyc02g072393.1	1.31771	0.000575679	K13420//LRR receptor-like serine/threonine-protein kinase FLS2 [EC:2.7.11.1]+ko04016//MAPK signaling pathway - plant+ko04626//Plant-pathogen interaction	GO:0016021//integral component of membrane;GO:0016020//membrane;GO:0031224//intrinsic component of membrane;GO:0044425//membrane part;GO:0000166//nucleotide binding;GO:0140096//catalytic activity, acting on a protein;GO:0030554//adenyl nucleotide binding;GO:0097159//organic cyclic compound binding;GO:0016772//transferase activity, transferring phosphorus-containing groups;GO:0008144//drug binding…	XP_010316836.1|0.0e+00|PREDICTED: probable LRR receptor-like serine/threonine-protein kinase At3g47570 [Solanum lycopersicum]
Solyc03g078360.1	1.31736	1.96362e-13	K04733//interleukin-1 receptor-associated kinase 4 [EC:2.7.11.1]	GO:0009987//cellular process;GO:0032501//multicellular organismal process;GO:0022414//reproductive process;GO:0000003//reproduction;GO:0044706//multi-multicellular organism process;GO:0048544//recognition of pollen;GO:0007154//cell communication;GO:0051704//multi-organism process;GO:0009856//pollination;GO:0008037//cell recognition;GO:0009875//pollen-pistil interaction;GO:0031224//intrinsic compo…	XP_004235072.1|0.0e+00|PREDICTED: G-type lectin S-receptor-like serine/threonine-protein kinase LECRK1 [Solanum lycopersicum]
Solyc03g121240.1	1.31526	2.49247e-61	K10863//aprataxin [EC:3.1.11.7 3.1.11.8 3.1.12.2];K16189//phytochrome-interacting factor 4+ko04075//Plant hormone signal transduction;K12126//phytochrome-interacting factor 3+ko04712//Circadian rhythm - plant+ko04075//Plant hormone signal transduction	GO:0005515//protein binding;GO:0046983//protein dimerization activity;GO:0005488//binding;	XP_004235627.1|8.8e-216|PREDICTED: transcription factor bHLH87 [Solanum lycopersicum]
Solyc02g091620.2	1.31471	1.95433e-17	K08739//DNA mismatch repair protein MLH3+ko03430//Mismatch repair	GO:0034641//cellular nitrogen compound metabolic process;GO:0008152//metabolic process;GO:0033554//cellular response to stress;GO:0035825//homologous recombination;GO:1903046//meiotic cell cycle process;GO:0006310//DNA recombination;GO:0044237//cellular metabolic process;GO:0071840//cellular component organization or biogenesis;GO:0140013//meiotic nuclear division;GO:0051321//meiotic cell cycle;G…	XP_019266929.1|4.0e-30|PREDICTED: DNA mismatch repair protein MLH3 isoform X1 [Nicotiana attenuata]
Solyc02g067700.1	1.31315	2.57205e-22	K19041//E3 ubiquitin-protein ligase RNF38/44 [EC:2.3.2.27];K15692//E3 ubiquitin-protein ligase RNF13 [EC:2.3.2.27]	GO:0044425//membrane part;GO:0016020//membrane;GO:0016021//integral component of membrane;GO:0031224//intrinsic component of membrane;	XP_015064010.1|1.7e-89|PREDICTED: E3 ubiquitin-protein ligase ATL23-like [Solanum pennellii]
Solyc05g008960.3	1.31268	5.99628e-32	K04733//interleukin-1 receptor-associated kinase 4 [EC:2.7.11.1]	GO:0007154//cell communication;GO:0007165//signal transduction;GO:0009987//cellular process;GO:0007166//cell surface receptor signaling pathway;GO:0023052//signaling;GO:0051716//cellular response to stimulus;GO:0050896//response to stimulus;GO:0065007//biological regulation;GO:0050794//regulation of cellular process;GO:0050789//regulation of biological process;GO:0005623//cell;GO:0044425//membran…	XP_004238902.1|0.0e+00|PREDICTED: LEAF RUST 10 DISEASE-RESISTANCE LOCUS RECEPTOR-LIKE PROTEIN KINASE-like 1.1 [Solanum lycopersicum]
Solyc04g051470.1	1.31005	4.42936e-06			OIT37082.1|1.1e-30|hypothetical protein A4A49_11417 [Nicotiana attenuata]
Solyc04g057830.1	1.30767	6.29438e-12			XP_010319727.1|1.3e-117|PREDICTED: uncharacterized protein LOC104646915 [Solanum lycopersicum]
Solyc03g083770.1	1.30752	0	K01051//pectinesterase [EC:3.1.1.11]+ko00040//Pentose and glucuronate interconversions+ko01100//Metabolic pathways	GO:0098772//molecular function regulator;GO:0030234//enzyme regulator activity;GO:0004857//enzyme inhibitor activity;	XP_004234934.1|3.2e-108|PREDICTED: 21 kDa protein-like [Solanum lycopersicum]
Solyc01g104430.2	1.30648	2.28374e-21	K14297//nuclear pore complex protein Nup98-Nup96+ko03013//RNA transport		XP_015165057.1|2.9e-34|PREDICTED: nuclear pore complex protein NUP98B-like isoform X2 [Solanum tuberosum]
Solyc01g107790.2	1.30644	6.62945e-09	K13420//LRR receptor-like serine/threonine-protein kinase FLS2 [EC:2.7.11.1]+ko04016//MAPK signaling pathway - plant+ko04626//Plant-pathogen interaction		XP_004231393.1|1.8e-230|PREDICTED: uncharacterized protein At4g06744 [Solanum lycopersicum]
Solyc10g005460.3	1.30644	0.000915383	K09422//transcription factor MYB, plant	GO:0065007//biological regulation;GO:0031326//regulation of cellular biosynthetic process;GO:2001141//regulation of RNA biosynthetic process;GO:0010556//regulation of macromolecule biosynthetic process;GO:0006355//regulation of transcription, DNA-templated;GO:0051252//regulation of RNA metabolic process;GO:0019219//regulation of nucleobase-containing compound metabolic process;GO:2000112//regulat…	XP_004248359.1|2.7e-182|PREDICTED: transcription factor MYB3-like [Solanum lycopersicum]
Solyc06g060710.3	1.30429	3.50653e-87	K00750//glycogenin [EC:2.4.1.186]+ko01100//Metabolic pathways+ko00500//Starch and sucrose metabolism;K13337//peroxin-19+ko04146//Peroxisome	GO:0044425//membrane part;GO:0016020//membrane;GO:0016021//integral component of membrane;GO:0031224//intrinsic component of membrane;GO:0016740//transferase activity;GO:0003824//catalytic activity;	XP_015079470.1|4.9e-238|PREDICTED: putative glucuronosyltransferase PGSIP8 [Solanum pennellii]
Solyc07g064650.2	1.30029	7.69417e-07	K20855//beta-1,3-galactosyltransferase 1/2/3/4/5/7/8 [EC:2.4.1.-]		XP_015081728.1|3.3e-79|PREDICTED: transcription repressor OFP14-like [Solanum pennellii]
Solyc02g083460.3	1.2962	8.21808e-141	K01381//saccharopepsin [EC:3.4.23.25];K01379//cathepsin D [EC:3.4.23.5];K00924//kinase [EC:2.7.1.-]	GO:0006807//nitrogen compound metabolic process;GO:0009057//macromolecule catabolic process;GO:0030163//protein catabolic process;GO:0071704//organic substance metabolic process;GO:0044238//primary metabolic process;GO:0008152//metabolic process;GO:0019538//protein metabolic process;GO:1901565//organonitrogen compound catabolic process;GO:0043170//macromolecule metabolic process;GO:0009056//catab…	NP_001333366.1|0.0e+00|aspartyl protease family protein precursor [Solanum lycopersicum]
Solyc12g005910.2	1.29288	5.2042e-186	K14009//B-cell receptor-associated protein 31+ko04141//Protein processing in endoplasmic reticulum	GO:0034613//cellular protein localization;GO:0070727//cellular macromolecule localization;GO:0033365//protein localization to organelle;GO:0033036//macromolecule localization;GO:0042886//amide transport;GO:0051179//localization;GO:0070973//protein localization to endoplasmic reticulum exit site;GO:0016192//vesicle-mediated transport;GO:0051234//establishment of localization;GO:0051641//cellular l…	XP_004251523.1|1.1e-113|PREDICTED: uncharacterized protein LOC101250189 [Solanum lycopersicum]
Solyc03g083460.3	1.29016	1.98305e-16	K19041//E3 ubiquitin-protein ligase RNF38/44 [EC:2.3.2.27]	GO:0006807//nitrogen compound metabolic process;GO:0043170//macromolecule metabolic process;GO:1901575//organic substance catabolic process;GO:1901564//organonitrogen compound metabolic process;GO:0030163//protein catabolic process;GO:0009057//macromolecule catabolic process;GO:0044267//cellular protein metabolic process;GO:0006511//ubiquitin-dependent protein catabolic process;GO:0044237//cellul…	XP_004234950.1|1.3e-223|PREDICTED: RING-H2 finger protein ATL22-like [Solanum lycopersicum]
Solyc01g005870.2	1.2875	0	K13420//LRR receptor-like serine/threonine-protein kinase FLS2 [EC:2.7.11.1]+ko04016//MAPK signaling pathway - plant+ko04626//Plant-pathogen interaction	GO:0016020//membrane;GO:0016021//integral component of membrane;GO:0031224//intrinsic component of membrane;GO:0044425//membrane part;	XP_004228624.1|0.0e+00|PREDICTED: receptor-like protein 12 [Solanum lycopersicum]
Solyc04g078370.3	1.28743	8.9325e-05	K00512//steroid 17alpha-monooxygenase / 17alpha-hydroxyprogesterone deacetylase [EC:1.14.14.19 1.14.14.32]+ko01100//Metabolic pathways;K13260//isoflavone/4'-methoxyisoflavone 2'-hydroxylase [EC:1.14.14.90 1.14.14.89]+ko01110//Biosynthesis of secondary metabolites+ko00943//Isoflavonoid biosynthesis	GO:0009987//cellular process;GO:0006950//response to stress;GO:0051707//response to other organism;GO:0006790//sulfur compound metabolic process;GO:0008152//metabolic process;GO:0019760//glucosinolate metabolic process;GO:0006952//defense response;GO:0006725//cellular aromatic compound metabolic process;GO:0019748//secondary metabolic process;GO:0043207//response to external biotic stimulus;GO:19…	XP_004238119.1|8.3e-298|PREDICTED: cytochrome P450 81E8 [Solanum lycopersicum]
Solyc02g067610.1	1.28588	4.07962e-17			XP_015168763.1|7.4e-43|PREDICTED: neurofilament medium polypeptide [Solanum tuberosum]
Solyc06g071810.1	1.28498	1.30178e-299	K04733//interleukin-1 receptor-associated kinase 4 [EC:2.7.11.1]	GO:0016021//integral component of membrane;GO:0016020//membrane;GO:0044425//membrane part;GO:0031224//intrinsic component of membrane;GO:0032559//adenyl ribonucleotide binding;GO:0005488//binding;GO:1901363//heterocyclic compound binding;GO:0000166//nucleotide binding;GO:0003824//catalytic activity;GO:0035639//purine ribonucleoside triphosphate binding;GO:1901265//nucleoside phosphate binding;GO:…	NP_001302425.1|0.0e+00|leucine-rich repeat receptor-like serine/threonine/tyrosine-protein kinase SOBIR1 precursor [Solanum lycopersicum]
Solyc04g025650.3	1.28352	0	K09838//zeaxanthin epoxidase [EC:1.14.15.21]+ko00906//Carotenoid biosynthesis+ko01100//Metabolic pathways+ko01110//Biosynthesis of secondary metabolites	GO:0044550//secondary metabolite biosynthetic process;GO:0008152//metabolic process;GO:0019748//secondary metabolic process;GO:0009058//biosynthetic process;GO:0036094//small molecule binding;GO:0071949//FAD binding;GO:0043168//anion binding;GO:0005488//binding;GO:0048037//cofactor binding;GO:0043167//ion binding;GO:0050660//flavin adenine dinucleotide binding;GO:0004497//monooxygenase activity;G…	XP_004237255.1|5.4e-227|PREDICTED: uncharacterized protein LOC101260928 [Solanum lycopersicum]
Solyc03g097230.1	1.28266	3.67802e-14	K19761//gamma-glutamylaminecyclotransferase [EC:2.3.2.-]	GO:0009628//response to abiotic stimulus;GO:0050896//response to stimulus;GO:0080167//response to karrikin;GO:0016740//transferase activity;GO:0003824//catalytic activity;	XP_004235360.1|1.5e-110|PREDICTED: putative gamma-glutamylcyclotransferase At3g02910 [Solanum lycopersicum]
Solyc03g112680.2	1.28167	2.79271e-05	K13420//LRR receptor-like serine/threonine-protein kinase FLS2 [EC:2.7.11.1]+ko04016//MAPK signaling pathway - plant+ko04626//Plant-pathogen interaction	GO:0031224//intrinsic component of membrane;GO:0016021//integral component of membrane;GO:0016020//membrane;GO:0044425//membrane part;GO:0003824//catalytic activity;GO:0016772//transferase activity, transferring phosphorus-containing groups;GO:0016301//kinase activity;GO:0016740//transferase activity;	XP_004236228.1|0.0e+00|PREDICTED: LRR receptor-like serine/threonine-protein kinase GSO1 [Solanum lycopersicum]
Solyc05g050380.3	1.28162	9.26271e-249	K05391//cyclic nucleotide gated channel, plant+ko04626//Plant-pathogen interaction	GO:0044425//membrane part;GO:0031224//intrinsic component of membrane;GO:0016021//integral component of membrane;GO:0016020//membrane;GO:0022803//passive transmembrane transporter activity;GO:0022838//substrate-specific channel activity;GO:0005215//transporter activity;GO:0005216//ion channel activity;GO:0022857//transmembrane transporter activity;GO:0015075//ion transmembrane transporter activit…	XP_010321516.1|0.0e+00|PREDICTED: cyclic nucleotide-gated ion channel 1 isoform X2 [Solanum lycopersicum]
Solyc06g054090.1	1.28114	5.30804e-09		GO:0016740//transferase activity;GO:0016407//acetyltransferase activity;GO:0016747//transferase activity, transferring acyl groups other than amino-acyl groups;GO:0003824//catalytic activity;GO:0016410//N-acyltransferase activity;GO:0008080//N-acetyltransferase activity;GO:0016746//transferase activity, transferring acyl groups;	XP_004241046.1|2.4e-108|PREDICTED: uncharacterized protein LOC101259756 [Solanum lycopersicum]
Solyc07g006480.3	1.27911	6.63613e-112	K22683//aspartyl protease family protein [EC:3.4.23.-]		XP_015081747.1|0.0e+00|PREDICTED: probably inactive leucine-rich repeat receptor-like protein kinase At5g48380 [Solanum pennellii]
Solyc05g009760.2	1.27755	8.98164e-79	K13453//disease resistance protein+ko04626//Plant-pathogen interaction;K14497//protein phosphatase 2C [EC:3.1.3.16]+ko04016//MAPK signaling pathway - plant+ko04075//Plant hormone signal transduction;K13457//disease resistance protein RPM1+ko04626//Plant-pathogen interaction	GO:0006952//defense response;GO:0006950//response to stress;GO:0050896//response to stimulus;GO:0043167//ion binding;GO:0043168//anion binding;GO:1901265//nucleoside phosphate binding;GO:0032553//ribonucleotide binding;GO:0036094//small molecule binding;GO:0000166//nucleotide binding;GO:0005488//binding;GO:1901363//heterocyclic compound binding;GO:0032555//purine ribonucleotide binding;GO:0097159…	XP_010320780.1|0.0e+00|PREDICTED: putative late blight resistance protein homolog R1B-17 isoform X1 [Solanum lycopersicum]
Solyc01g098527.1	1.27554	1.33299e-06	K01937//CTP synthase [EC:6.3.4.2]+ko01100//Metabolic pathways+ko00240//Pyrimidine metabolism	GO:0044281//small molecule metabolic process;GO:1901137//carbohydrate derivative biosynthetic process;GO:0055086//nucleobase-containing small molecule metabolic process;GO:0006082//organic acid metabolic process;GO:0009165//nucleotide biosynthetic process;GO:0044238//primary metabolic process;GO:0009147//pyrimidine nucleoside triphosphate metabolic process;GO:1901360//organic cyclic compound meta…	XP_010316211.1|4.6e-23|PREDICTED: CTP synthase 2 isoform X1 [Solanum lycopersicum]
Solyc07g062490.1	1.2748	0	K04733//interleukin-1 receptor-associated kinase 4 [EC:2.7.11.1]		XP_004244275.2|4.7e-172|PREDICTED: epidermis-specific secreted glycoprotein EP1-like [Solanum lycopersicum]
Solyc01g111440.3	1.27383	1.34782e-292	K19366//spartin+ko04144//Endocytosis		XP_004231032.1|8.5e-250|PREDICTED: protein EARLY-RESPONSIVE TO DEHYDRATION 7, chloroplastic-like [Solanum lycopersicum]
Solyc07g063940.2	1.27371	1.89792e-210	K14494//DELLA protein+ko04075//Plant hormone signal transduction;K14777//ATP-dependent RNA helicase DDX47/RRP3 [EC:3.6.4.13]	GO:0080090//regulation of primary metabolic process;GO:0010467//gene expression;GO:0044237//cellular metabolic process;GO:0051252//regulation of RNA metabolic process;GO:0010556//regulation of macromolecule biosynthetic process;GO:0044249//cellular biosynthetic process;GO:0046483//heterocycle metabolic process;GO:1903506//regulation of nucleic acid-templated transcription;GO:0044260//cellular mac…	NP_001293105.1|0.0e+00|GRAS2 protein [Solanum lycopersicum]
Solyc07g063620.3	1.27044	5.77702e-57			XP_004244184.1|2.9e-157|PREDICTED: uncharacterized protein LOC101267253 [Solanum lycopersicum]
Solyc07g045530.2	1.2697	4.10105e-26		GO:0044425//membrane part;GO:0016021//integral component of membrane;GO:0031224//intrinsic component of membrane;GO:0016020//membrane;	XP_015081650.1|3.8e-104|PREDICTED: uncharacterized protein LOC107025373 [Solanum pennellii]
Solyc04g078340.3	1.2697	1.62002e-08	K00512//steroid 17alpha-monooxygenase / 17alpha-hydroxyprogesterone deacetylase [EC:1.14.14.19 1.14.14.32]+ko01100//Metabolic pathways;K13260//isoflavone/4'-methoxyisoflavone 2'-hydroxylase [EC:1.14.14.90 1.14.14.89]+ko01110//Biosynthesis of secondary metabolites+ko00943//Isoflavonoid biosynthesis	GO:0019760//glucosinolate metabolic process;GO:0044237//cellular metabolic process;GO:0006790//sulfur compound metabolic process;GO:0009987//cellular process;GO:0019748//secondary metabolic process;GO:0009607//response to biotic stimulus;GO:0006807//nitrogen compound metabolic process;GO:0008152//metabolic process;GO:0071704//organic substance metabolic process;GO:1901564//organonitrogen compound…	XP_019069222.1|7.2e-306|PREDICTED: isoflavone 3'-hydroxylase-like [Solanum lycopersicum]
Solyc04g079730.1	1.26902	1.30133e-82	K01723//hydroperoxide dehydratase [EC:4.2.1.92]+ko00592//alpha-Linolenic acid metabolism+ko01100//Metabolic pathways+ko01110//Biosynthesis of secondary metabolites	GO:0005488//binding;GO:0003824//catalytic activity;GO:0046906//tetrapyrrole binding;GO:0097159//organic cyclic compound binding;GO:0046914//transition metal ion binding;GO:0016705//oxidoreductase activity, acting on paired donors, with incorporation or reduction of molecular oxygen;GO:0016491//oxidoreductase activity;GO:0020037//heme binding;GO:0043167//ion binding;GO:0005506//iron ion binding;GO…	XP_016568681.1|1.1e-272|PREDICTED: allene oxide synthase, chloroplastic [Capsicum annuum]
Solyc10g076410.1	1.26755	2.67781e-20	K14496//abscisic acid receptor PYR/PYL family+ko04016//MAPK signaling pathway - plant+ko04075//Plant hormone signal transduction		XP_004249065.1|2.1e-115|PREDICTED: abscisic acid receptor PYL4-like [Solanum lycopersicum]
Solyc03g111290.1	1.26603	1.1045e-24	K20665//jasmonoyl-L-amino acid 12-hydroxylase [EC:1.14.14.48]	GO:0016491//oxidoreductase activity;GO:0020037//heme binding;GO:0005506//iron ion binding;GO:0097159//organic cyclic compound binding;GO:0046872//metal ion binding;GO:0016705//oxidoreductase activity, acting on paired donors, with incorporation or reduction of molecular oxygen;GO:0046914//transition metal ion binding;GO:0043167//ion binding;GO:1901363//heterocyclic compound binding;GO:0046906//te…	XP_004236333.1|2.9e-291|PREDICTED: cytochrome P450 94B3-like [Solanum lycopersicum]
Solyc01g014620.1	1.26573	0.000124946
Solyc03g007930.3	1.26527	0.00047031		GO:0005975//carbohydrate metabolic process;GO:0071704//organic substance metabolic process;GO:0044238//primary metabolic process;GO:0008152//metabolic process;GO:0004553//hydrolase activity, hydrolyzing O-glycosyl compounds;GO:0016798//hydrolase activity, acting on glycosyl bonds;GO:0003824//catalytic activity;GO:0004650//polygalacturonase activity;GO:0016787//hydrolase activity;	XP_004234221.1|3.2e-36|PREDICTED: probable polygalacturonase [Solanum lycopersicum]
Solyc10g085335.1	1.26498	2.32998e-10	K20456//oxysterol-binding protein 1;K03327//multidrug resistance protein, MATE family	GO:0016020//membrane;GO:0031224//intrinsic component of membrane;GO:0016021//integral component of membrane;GO:0044425//membrane part;GO:0015238//drug transmembrane transporter activity;GO:0005215//transporter activity;GO:0015291//secondary active transmembrane transporter activity;GO:0015297//antiporter activity;GO:0022804//active transmembrane transporter activity;GO:0022857//transmembrane tran…	XP_010312309.1|1.6e-146|PREDICTED: protein DETOXIFICATION 44, chloroplastic [Solanum lycopersicum]
Solyc06g008265.1	1.26479	6.12531e-18	K13420//LRR receptor-like serine/threonine-protein kinase FLS2 [EC:2.7.11.1]+ko04016//MAPK signaling pathway - plant+ko04626//Plant-pathogen interaction		XP_004240486.2|0.0e+00|PREDICTED: probable leucine-rich repeat receptor-like protein kinase At1g35710 [Solanum lycopersicum]
Solyc08g014023.1	1.26402	7.77654e-06			XP_006355775.1|2.3e-28|PREDICTED: uncharacterized protein LOC102603203 [Solanum tuberosum]
Solyc02g079170.3	1.26306	1.00122e-61	K17871//NADH:ubiquinone reductase (non-electrogenic) [EC:1.6.5.9]	GO:0046872//metal ion binding;GO:0043167//ion binding;GO:0005488//binding;GO:0003824//catalytic activity;GO:0016491//oxidoreductase activity;GO:0043169//cation binding;GO:0005509//calcium ion binding;	XP_015067245.1|0.0e+00|PREDICTED: external alternative NAD(P)H-ubiquinone oxidoreductase B2, mitochondrial [Solanum pennellii]
Solyc09g082620.3	1.2622	1.78518e-17		GO:0010052//guard cell differentiation;GO:0010374//stomatal complex development;GO:0030154//cell differentiation;GO:0048367//shoot system development;GO:0090558//plant epidermis development;GO:0009987//cellular process;GO:0090626//plant epidermis morphogenesis;GO:0048869//cellular developmental process;GO:0010016//shoot system morphogenesis;GO:0009653//anatomical structure morphogenesis;GO:000988…	XP_010326691.1|1.1e-57|PREDICTED: EPIDERMAL PATTERNING FACTOR-like protein 4 [Solanum lycopersicum]
Solyc12g042930.2	1.26163	2.17636e-05	K03097//casein kinase II subunit alpha [EC:2.7.11.1]+ko04712//Circadian rhythm - plant+ko03008//Ribosome biogenesis in eukaryotes		XP_004252488.1|1.9e-221|PREDICTED: uncharacterized protein LOC101250580 [Solanum lycopersicum]
Solyc07g049180.3	1.26052	6.13112e-156	K13429//chitin elicitor receptor kinase 1+ko04626//Plant-pathogen interaction	GO:0036211//protein modification process;GO:0065007//biological regulation;GO:0008152//metabolic process;GO:0071704//organic substance metabolic process;GO:1901564//organonitrogen compound metabolic process;GO:0006796//phosphate-containing compound metabolic process;GO:0050794//regulation of cellular process;GO:0006793//phosphorus metabolic process;GO:0051716//cellular response to stimulus;GO:005…	NP_001233773.1|0.0e+00|LysM receptor-like kinase isoform 1 precursor [Solanum lycopersicum]
Solyc02g067440.3	1.25859	8.53023e-19	K10712//cysteamine dioxygenase [EC:1.13.11.19]+ko00430//Taurine and hypotaurine metabolism+ko01100//Metabolic pathways	GO:0003824//catalytic activity;GO:0051213//dioxygenase activity;GO:0016491//oxidoreductase activity;GO:0016701//oxidoreductase activity, acting on single donors with incorporation of molecular oxygen;GO:0016702//oxidoreductase activity, acting on single donors with incorporation of molecular oxygen, incorporation of two atoms of oxygen;	XP_004233351.1|8.4e-156|PREDICTED: plant cysteine oxidase 2 [Solanum lycopersicum]
Solyc05g012770.3	1.25847	8.00156e-70	K08819//cyclin-dependent kinase 12/13 [EC:2.7.11.22 2.7.11.23];K13424//WRKY transcription factor 33+ko04016//MAPK signaling pathway - plant+ko04626//Plant-pathogen interaction	GO:0009058//biosynthetic process;GO:0044271//cellular nitrogen compound biosynthetic process;GO:1901362//organic cyclic compound biosynthetic process;GO:0071704//organic substance metabolic process;GO:0043170//macromolecule metabolic process;GO:0008152//metabolic process;GO:1901360//organic cyclic compound metabolic process;GO:0046483//heterocycle metabolic process;GO:0006139//nucleobase-containi…	XP_004239088.1|1.3e-298|PREDICTED: probable WRKY transcription factor 4 [Solanum lycopersicum]
Solyc04g011520.3	1.25808	1.42361e-92	K04733//interleukin-1 receptor-associated kinase 4 [EC:2.7.11.1]	GO:0006793//phosphorus metabolic process;GO:0043412//macromolecule modification;GO:0006796//phosphate-containing compound metabolic process;GO:0006807//nitrogen compound metabolic process;GO:0043170//macromolecule metabolic process;GO:0023052//signaling;GO:0065007//biological regulation;GO:0019538//protein metabolic process;GO:0007165//signal transduction;GO:0044260//cellular macromolecule metabo…	XP_004236745.1|1.6e-227|PREDICTED: protein kinase APK1A, chloroplastic [Solanum lycopersicum]
Solyc11g011500.2	1.2562	3.82161e-10	K21867//potassium channel	GO:0016021//integral component of membrane;GO:0016020//membrane;GO:0031224//intrinsic component of membrane;GO:0044425//membrane part;GO:0015318//inorganic molecular entity transmembrane transporter activity;GO:0098782//mechanosensitived potassium channel activity;GO:0008324//cation transmembrane transporter activity;GO:0005267//potassium channel activity;GO:0005249//voltage-gated potassium chann…	AQL90330.1|0.0e+00|SKOR [Lycium ruthenicum]
Solyc00g145170.2	1.25535	0.00018604		GO:0004866//endopeptidase inhibitor activity;GO:0061135//endopeptidase regulator activity;GO:0061134//peptidase regulator activity;GO:0004857//enzyme inhibitor activity;GO:0030234//enzyme regulator activity;GO:0004867//serine-type endopeptidase inhibitor activity;GO:0098772//molecular function regulator;GO:0030414//peptidase inhibitor activity;	XP_019067315.1|1.2e-83|PREDICTED: proteinase inhibitor type-2 P303.51-like isoform X2 [Solanum lycopersicum]
Solyc04g011440.4	1.2552	4.11295e-27	K03283//heat shock 70kDa protein 1/2/6/8+ko03040//Spliceosome+ko04144//Endocytosis+ko04141//Protein processing in endoplasmic reticulum	GO:0036094//small molecule binding;GO:0035639//purine ribonucleoside triphosphate binding;GO:0030554//adenyl nucleotide binding;GO:0032559//adenyl ribonucleotide binding;GO:0008144//drug binding;GO:0000166//nucleotide binding;GO:1901363//heterocyclic compound binding;GO:1901265//nucleoside phosphate binding;GO:0032555//purine ribonucleotide binding;GO:0005488//binding;GO:0032553//ribonucleotide b…	AAB42159.1|0.0e+00|Hsc70 [Solanum lycopersicum]
Solyc07g017880.3	1.2552	0.000196874	K00430//peroxidase [EC:1.11.1.7]+ko01100//Metabolic pathways+ko01110//Biosynthesis of secondary metabolites+ko00940//Phenylpropanoid biosynthesis	GO:0042743//hydrogen peroxide metabolic process;GO:0042737//drug catabolic process;GO:0017144//drug metabolic process;GO:0044248//cellular catabolic process;GO:0050896//response to stimulus;GO:0042744//hydrogen peroxide catabolic process;GO:0006950//response to stress;GO:0051187//cofactor catabolic process;GO:0072593//reactive oxygen species metabolic process;GO:0044237//cellular metabolic proces…	XP_004242911.1|4.2e-187|PREDICTED: peroxidase 16 [Solanum lycopersicum]
Solyc11g006910.2	1.25269	1.9269e-09	K02639//ferredoxin+ko00195//Photosynthesis	GO:0055114//oxidation-reduction process;GO:0022900//electron transport chain;GO:0006091//generation of precursor metabolites and energy;GO:0008152//metabolic process;GO:0009987//cellular process;GO:0044237//cellular metabolic process;GO:0005737//cytoplasm;GO:0005622//intracellular;GO:0043229//intracellular organelle;GO:0009536//plastid;GO:0044424//intracellular part;GO:0044464//cell part;GO:00444…	XP_004249961.1|1.0e-75|PREDICTED: ferredoxin, root R-B2-like [Solanum lycopersicum]
Solyc01g112220.3	1.25133	2.32924e-64	K04733//interleukin-1 receptor-associated kinase 4 [EC:2.7.11.1]	GO:0065007//biological regulation;GO:0006468//protein phosphorylation;GO:0050794//regulation of cellular process;GO:0006796//phosphate-containing compound metabolic process;GO:0008152//metabolic process;GO:0050789//regulation of biological process;GO:0019538//protein metabolic process;GO:0009987//cellular process;GO:0043170//macromolecule metabolic process;GO:0044238//primary metabolic process;GO…	XP_004231098.1|8.4e-234|PREDICTED: probable serine/threonine-protein kinase Cx32, chloroplastic [Solanum lycopersicum]
Solyc08g068410.2	1.25073	1.8687e-06		GO:0050793//regulation of developmental process;GO:0048519//negative regulation of biological process;GO:0010556//regulation of macromolecule biosynthetic process;GO:0048731//system development;GO:0009892//negative regulation of metabolic process;GO:0048523//negative regulation of cellular process;GO:0031324//negative regulation of cellular metabolic process;GO:0048856//anatomical structure devel…	XP_010325171.1|2.5e-281|PREDICTED: uncharacterized protein LOC104648859 [Solanum lycopersicum]
Solyc06g005300.3	1.24821	1.50054e-17			XP_004240350.1|3.4e-137|PREDICTED: uncharacterized protein LOC101250122 [Solanum lycopersicum]
Solyc09g014590.3	1.24505	0.000656444	K13420//LRR receptor-like serine/threonine-protein kinase FLS2 [EC:2.7.11.1]+ko04016//MAPK signaling pathway - plant+ko04626//Plant-pathogen interaction		XP_010325793.1|4.7e-178|PREDICTED: LOW QUALITY PROTEIN: polygalacturonase inhibitor 2-like [Solanum lycopersicum]
Solyc03g043700.3	1.24371	1.64327e-06	K08332//vacuolar protein 8	GO:0043227//membrane-bounded organelle;GO:0044424//intracellular part;GO:0005623//cell;GO:0043229//intracellular organelle;GO:0043226//organelle;GO:0043231//intracellular membrane-bounded organelle;GO:0044464//cell part;GO:0005737//cytoplasm;GO:0005634//nucleus;GO:0005622//intracellular;	XP_004234710.1|2.3e-195|PREDICTED: U-box domain-containing protein 4-like isoform X1 [Solanum lycopersicum]
Solyc03g026360.1	1.24371	0.000998199	K03363//cell division cycle 20, cofactor of APC complex+ko04120//Ubiquitin mediated proteolysis	GO:0016020//membrane;GO:0031224//intrinsic component of membrane;GO:0044425//membrane part;GO:0016021//integral component of membrane;	XP_009626309.1|2.9e-48|PREDICTED: uncharacterized protein LOC104117035 [Nicotiana tomentosiformis]
Solyc06g083390.3	1.24241	0	K13456//RPM1-interacting protein 4+ko04626//Plant-pathogen interaction		XP_004242410.1|4.2e-143|PREDICTED: RPM1-interacting protein 4 [Solanum lycopersicum]
Solyc07g063520.3	1.24089	3.50826e-235		GO:0006810//transport;GO:0051234//establishment of localization;GO:0051179//localization;GO:0031224//intrinsic component of membrane;GO:0016020//membrane;GO:0044425//membrane part;GO:0016021//integral component of membrane;GO:0005215//transporter activity;	XP_004244193.1|2.9e-169|PREDICTED: transmembrane protein 184C [Solanum lycopersicum]
Solyc01g005040.3	1.23964	4.11766e-10		GO:0005886//plasma membrane;GO:0016021//integral component of membrane;GO:0071944//cell periphery;GO:0031224//intrinsic component of membrane;GO:0016020//membrane;GO:0044425//membrane part;GO:0005623//cell;GO:0044464//cell part;	XP_004228943.1|9.9e-94|PREDICTED: CASP-like protein PIMP1 [Solanum lycopersicum]
Solyc05g024010.3	1.23832	1.7072e-75	K12135//zinc finger protein CONSTANS+ko04712//Circadian rhythm - plant	GO:0043226//organelle;GO:0005634//nucleus;GO:0005623//cell;GO:0043231//intracellular membrane-bounded organelle;GO:0044464//cell part;GO:0043227//membrane-bounded organelle;GO:0005622//intracellular;GO:0044424//intracellular part;GO:0043229//intracellular organelle;GO:0043169//cation binding;GO:0046872//metal ion binding;GO:0046914//transition metal ion binding;GO:0008270//zinc ion binding;GO:000…	XP_004239301.1|1.9e-267|PREDICTED: zinc finger protein CONSTANS-LIKE 14-like [Solanum lycopersicum]
Solyc05g015840.3	1.23431	8.60677e-86	K13415//protein brassinosteroid insensitive 1 [EC:2.7.10.1 2.7.11.1]+ko04075//Plant hormone signal transduction;K20641//Rho GTPase-activating protein 20	GO:0005622//intracellular;GO:0044464//cell part;GO:0043231//intracellular membrane-bounded organelle;GO:0005634//nucleus;GO:0043226//organelle;GO:0043227//membrane-bounded organelle;GO:0043229//intracellular organelle;GO:0044424//intracellular part;GO:0005623//cell;GO:1901363//heterocyclic compound binding;GO:0043167//ion binding;GO:0003677//DNA binding;GO:0043169//cation binding;GO:0003676//nucl…	XP_004239238.1|3.0e-179|PREDICTED: teosinte glume architecture 1 [Solanum lycopersicum]
Solyc06g060830.3	1.23288	0	K09338//homeobox-leucine zipper protein	GO:0043227//membrane-bounded organelle;GO:0005622//intracellular;GO:0043229//intracellular organelle;GO:0044464//cell part;GO:0005623//cell;GO:0043226//organelle;GO:0044424//intracellular part;GO:0043231//intracellular membrane-bounded organelle;GO:0005634//nucleus;GO:0043565//sequence-specific DNA binding;GO:1901363//heterocyclic compound binding;GO:0005488//binding;GO:0003677//DNA binding;GO:01…	XP_004241991.1|2.1e-173|PREDICTED: homeobox-leucine zipper protein HAT4 [Solanum lycopersicum]
Solyc09g091090.2	1.23163	3.95726e-07	K11816//indole-3-pyruvate monooxygenase [EC:1.14.13.168]+ko00380//Tryptophan metabolism+ko01100//Metabolic pathways	GO:1901265//nucleoside phosphate binding;GO:0004499//N,N-dimethylaniline monooxygenase activity;GO:0016705//oxidoreductase activity, acting on paired donors, with incorporation or reduction of molecular oxygen;GO:0016491//oxidoreductase activity;GO:0004497//monooxygenase activity;GO:0050662//coenzyme binding;GO:0005488//binding;GO:0048037//cofactor binding;GO:0000166//nucleotide binding;GO:005066…	NP_001318111.1|1.9e-254|flavin monooxygenase-like protein [Solanum lycopersicum]
Solyc02g032950.3	1.23111	6.8614e-64	K13424//WRKY transcription factor 33+ko04016//MAPK signaling pathway - plant+ko04626//Plant-pathogen interaction	GO:0009058//biosynthetic process;GO:0006351//transcription, DNA-templated;GO:0044238//primary metabolic process;GO:0044260//cellular macromolecule metabolic process;GO:1901360//organic cyclic compound metabolic process;GO:0009987//cellular process;GO:0008152//metabolic process;GO:0009059//macromolecule biosynthetic process;GO:0034645//cellular macromolecule biosynthetic process;GO:0019438//aromat…	XP_004231617.1|3.4e-294|PREDICTED: WRKY transcription factor 6 [Solanum lycopersicum]
Solyc01g096820.3	1.22637	0.000609418	K13412//calcium-dependent protein kinase [EC:2.7.11.1]+ko04626//Plant-pathogen interaction	GO:0006468//protein phosphorylation;GO:0016310//phosphorylation;GO:0036211//protein modification process;GO:0018193//peptidyl-amino acid modification;GO:0044260//cellular macromolecule metabolic process;GO:0006796//phosphate-containing compound metabolic process;GO:0046777//protein autophosphorylation;GO:0035556//intracellular signal transduction;GO:0008152//metabolic process;GO:0051716//cellular…	XP_004230058.1|6.3e-294|PREDICTED: calcium and calcium/calmodulin-dependent serine/threonine-protein kinase-like [Solanum lycopersicum]
Solyc05g016060.3	1.22365	1.67932e-146		GO:0032502//developmental process;GO:0003006//developmental process involved in reproduction;GO:0000003//reproduction;GO:0022414//reproductive process;GO:0044425//membrane part;GO:0005623//cell;GO:0044464//cell part;GO:0016020//membrane;GO:0005886//plasma membrane;GO:0016021//integral component of membrane;GO:0071944//cell periphery;GO:0031224//intrinsic component of membrane;	XP_004239248.1|7.6e-37|PREDICTED: cysteine-rich and transmembrane domain-containing protein A-like [Solanum lycopersicum]
Solyc10g055230.1	1.22317	1.14998e-06	K01870//isoleucyl-tRNA synthetase [EC:6.1.1.5]+ko00970//Aminoacyl-tRNA biosynthesis;K19027//zinc finger FYVE domain-containing protein 26	GO:0005576//extracellular region;GO:0048046//apoplast;GO:0003824//catalytic activity;GO:0016853//isomerase activity;	XP_004248662.1|1.2e-101|PREDICTED: dirigent protein 22-like [Solanum lycopersicum]
Solyc02g078150.3	1.22297	1.87809e-72			XP_015064173.1|4.0e-182|PREDICTED: uncharacterized protein LOC107009366 [Solanum pennellii]
Solyc11g005350.2	1.22227	1.95968e-42	K17500//integrin-linked kinase-associated serine/threonine phosphatase 2C [EC:3.1.3.16]	GO:0051179//localization;GO:0051234//establishment of localization;GO:0006810//transport;GO:0016020//membrane;GO:0005623//cell;GO:0005886//plasma membrane;GO:0044464//cell part;GO:0071944//cell periphery;GO:0031224//intrinsic component of membrane;GO:0044425//membrane part;GO:0016021//integral component of membrane;GO:0022857//transmembrane transporter activity;GO:0005215//transporter activity;	XP_010312462.1|8.9e-211|PREDICTED: WAT1-related protein At1g68170 [Solanum lycopersicum]
Solyc06g069693.1	1.22069	3.07112e-14	K12127//pseudo-response regulator 1+ko04712//Circadian rhythm - plant	GO:0035556//intracellular signal transduction;GO:0050896//response to stimulus;GO:0051716//cellular response to stimulus;GO:0050789//regulation of biological process;GO:0023052//signaling;GO:0065007//biological regulation;GO:0009987//cellular process;GO:0000160//phosphorelay signal transduction system;GO:0007154//cell communication;GO:0007165//signal transduction;GO:0050794//regulation of cellula…	XP_004242175.1|1.5e-79|PREDICTED: two-component response regulator-like APRR1 [Solanum lycopersicum]
Solyc02g079860.1	1.21723	0.000771239			XP_010316628.1|4.5e-259|PREDICTED: BTB/POZ domain-containing protein At3g22104-like [Solanum lycopersicum]
Solyc11g007510.2	1.21544	2.22456e-141			XP_004249997.1|0.0e+00|PREDICTED: uncharacterized protein LOC101251943 [Solanum lycopersicum]
Solyc03g078120.3	1.21544	1.86046e-162	K00521//ferric-chelate reductase [EC:1.16.1.7];K12349//neutral ceramidase [EC:3.5.1.23]+ko00600//Sphingolipid metabolism+ko01100//Metabolic pathways		XP_004235079.1|1.3e-256|PREDICTED: NAC domain-containing protein 82-like [Solanum lycopersicum]
Solyc02g036440.3	1.21425	6.45871e-07		GO:0016020//membrane;GO:0016021//integral component of membrane;GO:0031224//intrinsic component of membrane;GO:0044425//membrane part;	XP_004231627.1|3.5e-202|PREDICTED: ALA-interacting subunit 5 [Solanum lycopersicum]
Solyc04g014830.2	1.21245	7.34912e-08	K14494//DELLA protein+ko04075//Plant hormone signal transduction	GO:0008152//metabolic process;GO:0010468//regulation of gene expression;GO:0034645//cellular macromolecule biosynthetic process;GO:1901362//organic cyclic compound biosynthetic process;GO:0050789//regulation of biological process;GO:0034641//cellular nitrogen compound metabolic process;GO:2000112//regulation of cellular macromolecule biosynthetic process;GO:0051171//regulation of nitrogen compoun…	XP_015072173.1|0.0e+00|PREDICTED: scarecrow-like protein 21 [Solanum pennellii]
Solyc09g098160.3	1.21208	7.05722e-20	K06911//uncharacterized protein	GO:0043229//intracellular organelle;GO:0005622//intracellular;GO:0043226//organelle;GO:0043231//intracellular membrane-bounded organelle;GO:0043227//membrane-bounded organelle;GO:0044464//cell part;GO:0005634//nucleus;GO:0044424//intracellular part;GO:0005623//cell;	NP_001234292.1|1.4e-169|pirin-like protein [Solanum lycopersicum]
Solyc01g107820.2	1.2118	0	K13496//UDP-glucosyl transferase 73C [EC:2.4.1.-]	GO:0008152//metabolic process;GO:0005622//intracellular;GO:0043227//membrane-bounded organelle;GO:0044464//cell part;GO:0043229//intracellular organelle;GO:0043231//intracellular membrane-bounded organelle;GO:0005623//cell;GO:0044424//intracellular part;GO:0043226//organelle;GO:0080044//quercetin 7-O-glucosyltransferase activity;GO:0035251//UDP-glucosyltransferase activity;GO:0080043//quercetin 3…	NP_001315561.1|1.2e-275|scopoletin glucosyltransferase [Solanum lycopersicum]
Solyc07g049550.3	1.21106	1.1709e-74	K05933//aminocyclopropanecarboxylate oxidase [EC:1.14.17.4]+ko01100//Metabolic pathways+ko01110//Biosynthesis of secondary metabolites+ko00270//Cysteine and methionine metabolism	GO:0007568//aging;GO:0043449//cellular alkene metabolic process;GO:0003006//developmental process involved in reproduction;GO:0061458//reproductive system development;GO:0065008//regulation of biological quality;GO:0009692//ethylene metabolic process;GO:0044249//cellular biosynthetic process;GO:0009835//fruit ripening;GO:0000003//reproduction;GO:0008152//metabolic process;GO:0010817//regulation o…	NP_001233928.1|2.0e-182|1-aminocyclopropane-1-carboxylate oxidase 4 [Solanum lycopersicum]
Solyc10g078510.2	1.20917	8.50357e-73	K15429//tRNA (guanine37-N1)-methyltransferase [EC:2.1.1.228];K19893//glucan endo-1,3-beta-glucosidase 5/6 [EC:3.2.1.39]+ko00500//Starch and sucrose metabolism	GO:0071704//organic substance metabolic process;GO:0044238//primary metabolic process;GO:0008152//metabolic process;GO:0005975//carbohydrate metabolic process;GO:0031224//intrinsic component of membrane;GO:0044464//cell part;GO:0044459//plasma membrane part;GO:0046658//anchored component of plasma membrane;GO:0031225//anchored component of membrane;GO:0005623//cell;GO:0031226//intrinsic component…	NP_001332903.1|1.4e-271|glycosyl hydrolase family protein [Solanum lycopersicum]
Solyc03g118200.3	1.20725	2.03121e-209	K16280//E3 ubiquitin-protein ligase RGLG [EC:2.3.2.27]	GO:0048523//negative regulation of cellular process;GO:0050794//regulation of cellular process;GO:0065007//biological regulation;GO:0050789//regulation of biological process;GO:0010941//regulation of cell death;GO:0060548//negative regulation of cell death;GO:0048519//negative regulation of biological process;GO:0005488//binding;GO:0005543//phospholipid binding;GO:0008289//lipid binding;GO:004316…	XP_004235846.1|4.9e-287|PREDICTED: protein BONZAI 1-like [Solanum lycopersicum]
Solyc03g081240.3	1.20547	8.26752e-173	K12130//pseudo-response regulator 5+ko04712//Circadian rhythm - plant	GO:0050794//regulation of cellular process;GO:0023052//signaling;GO:0050789//regulation of biological process;GO:0065007//biological regulation;GO:0000160//phosphorelay signal transduction system;GO:0051716//cellular response to stimulus;GO:0050896//response to stimulus;GO:0007154//cell communication;GO:0035556//intracellular signal transduction;GO:0007165//signal transduction;GO:0009987//cellula…	XP_004235024.1|0.0e+00|PREDICTED: two-component response regulator-like APRR5 [Solanum lycopersicum]
Solyc01g059965.1	1.20546	8.14747e-28	K19891//glucan endo-1,3-beta-glucosidase 1/2/3 [EC:3.2.1.39]+ko00500//Starch and sucrose metabolism	GO:0071704//organic substance metabolic process;GO:0005975//carbohydrate metabolic process;GO:0006952//defense response;GO:0050896//response to stimulus;GO:0008152//metabolic process;GO:0044238//primary metabolic process;GO:0006950//response to stress;GO:0046658//anchored component of plasma membrane;GO:0031226//intrinsic component of plasma membrane;GO:0005773//vacuole;GO:0043226//organelle;GO:0…	NP_001234805.1|4.4e-209|glucan endo-1,3-beta-glucosidase B precursor [Solanum lycopersicum]
Solyc05g009610.1	1.20471	2.9221e-15	K14493//gibberellin receptor GID1 [EC:3.-.-.-]+ko04075//Plant hormone signal transduction	GO:0008152//metabolic process;GO:0003824//catalytic activity;GO:0016787//hydrolase activity;	XP_004238946.1|6.2e-200|PREDICTED: probable carboxylesterase 6 [Solanum lycopersicum]
Solyc02g077240.3	1.19825	7.68377e-23	K01568//pyruvate decarboxylase [EC:4.1.1.1]+ko00010//Glycolysis / Gluconeogenesis+ko01100//Metabolic pathways+ko01110//Biosynthesis of secondary metabolites	GO:0048037//cofactor binding;GO:0043168//anion binding;GO:0016831//carboxy-lyase activity;GO:1901681//sulfur compound binding;GO:0016830//carbon-carbon lyase activity;GO:0043169//cation binding;GO:0003824//catalytic activity;GO:0030976//thiamine pyrophosphate binding;GO:0016829//lyase activity;GO:0043167//ion binding;GO:0019842//vitamin binding;GO:0005488//binding;GO:0050662//coenzyme binding;GO:…	XP_009801931.1|0.0e+00|PREDICTED: pyruvate decarboxylase 1 isoform X1 [Nicotiana sylvestris]
Solyc08g006750.3	1.19821	3.84641e-16	K22427//phenylalanine decarboxylase [EC:4.1.1.53]+ko00360//Phenylalanine metabolism	GO:0009987//cellular process;GO:0019752//carboxylic acid metabolic process;GO:0044281//small molecule metabolic process;GO:0008152//metabolic process;GO:0006082//organic acid metabolic process;GO:0043436//oxoacid metabolic process;GO:0044237//cellular metabolic process;GO:0071704//organic substance metabolic process;GO:0005488//binding;GO:0003824//catalytic activity;GO:0008144//drug binding;GO:00…	XP_004244519.1|1.1e-273|PREDICTED: histidine decarboxylase [Solanum lycopersicum]
Solyc06g076080.2	1.19764	2.71944e-20			XP_015158308.1|1.3e-06|PREDICTED: sericin-1-like [Solanum tuberosum]
Solyc03g111170.3	1.19746	2.67033e-81	K10526//OPC-8:0 CoA ligase 1 [EC:6.2.1.-]+ko00592//alpha-Linolenic acid metabolism+ko01100//Metabolic pathways+ko01110//Biosynthesis of secondary metabolites	GO:0044237//cellular metabolic process;GO:0019752//carboxylic acid metabolic process;GO:0032787//monocarboxylic acid metabolic process;GO:0042445//hormone metabolic process;GO:0072330//monocarboxylic acid biosynthetic process;GO:0008152//metabolic process;GO:0016053//organic acid biosynthetic process;GO:0042446//hormone biosynthetic process;GO:0044283//small molecule biosynthetic process;GO:00096…	XP_004236342.1|0.0e+00|PREDICTED: 4-coumarate--CoA ligase-like 9 [Solanum lycopersicum]
Solyc02g077110.3	1.19562	1.28301e-136	K00145//N-acetyl-gamma-glutamyl-phosphate reductase [EC:1.2.1.38]+ko00220//Arginine biosynthesis+ko01230//Biosynthesis of amino acids+ko01100//Metabolic pathways+ko01110//Biosynthesis of secondary metabolites+ko01210//2-Oxocarboxylic acid metabolism	GO:0006629//lipid metabolic process;GO:0008152//metabolic process;GO:0071704//organic substance metabolic process;GO:0044238//primary metabolic process;GO:0003824//catalytic activity;GO:0004620//phospholipase activity;GO:0052689//carboxylic ester hydrolase activity;GO:0016788//hydrolase activity, acting on ester bonds;GO:0008970//phospholipase A1 activity;GO:0016787//hydrolase activity;GO:0016298…	XP_004232957.2|6.4e-251|PREDICTED: phospholipase A1-II 1-like [Solanum lycopersicum]
Solyc02g090810.3	1.1928	8.93161e-10	K13448//calcium-binding protein CML+ko04626//Plant-pathogen interaction	GO:0043167//ion binding;GO:0005509//calcium ion binding;GO:0005488//binding;GO:0043169//cation binding;GO:0046872//metal ion binding;	XP_004232035.1|5.2e-85|PREDICTED: caltractin [Solanum lycopersicum]
Solyc12g049350.2	1.19187	4.47948e-05	K09422//transcription factor MYB, plant	GO:0080090//regulation of primary metabolic process;GO:0006357//regulation of transcription by RNA polymerase II;GO:0050794//regulation of cellular process;GO:0019222//regulation of metabolic process;GO:0010628//positive regulation of gene expression;GO:0019219//regulation of nucleobase-containing compound metabolic process;GO:0048522//positive regulation of cellular process;GO:0032502//developme…	XP_004252405.1|2.3e-173|PREDICTED: transcription factor MYB12-like isoform X2 [Solanum lycopersicum]
Solyc01g091910.4	1.19008	9.59902e-150	K01115//phospholipase D1/2 [EC:3.1.4.4]+ko04144//Endocytosis+ko01100//Metabolic pathways+ko01110//Biosynthesis of secondary metabolites+ko00564//Glycerophospholipid metabolism+ko00565//Ether lipid metabolism	GO:0006796//phosphate-containing compound metabolic process;GO:0046470//phosphatidylcholine metabolic process;GO:0006644//phospholipid metabolic process;GO:0044238//primary metabolic process;GO:1901575//organic substance catabolic process;GO:0008152//metabolic process;GO:0071704//organic substance metabolic process;GO:0006807//nitrogen compound metabolic process;GO:0044255//cellular lipid metabol…	XP_015062293.1|0.0e+00|PREDICTED: phospholipase D gamma 1-like [Solanum pennellii]
Solyc04g011790.1	1.18765	3.30069e-10	K03676//glutaredoxin 3	GO:0065008//regulation of biological quality;GO:0009987//cellular process;GO:0065007//biological regulation;GO:0050794//regulation of cellular process;GO:0019725//cellular homeostasis;GO:0050789//regulation of biological process;GO:0045454//cell redox homeostasis;GO:0042592//homeostatic process;GO:0005623//cell;GO:0015036//disulfide oxidoreductase activity;GO:0015035//protein disulfide oxidoreduc…	XP_004236721.1|4.1e-51|PREDICTED: monothiol glutaredoxin-S1-like [Solanum lycopersicum]
Solyc07g055720.3	1.18299	7.0077e-143	K13993//HSP20 family protein+ko04141//Protein processing in endoplasmic reticulum	GO:0043226//organelle;GO:0043231//intracellular membrane-bounded organelle;GO:0042579//microbody;GO:0043227//membrane-bounded organelle;GO:0005623//cell;GO:0044444//cytoplasmic part;GO:0044424//intracellular part;GO:0043229//intracellular organelle;GO:0044464//cell part;GO:0005622//intracellular;GO:0005777//peroxisome;GO:0005737//cytoplasm;	XP_004243244.1|2.2e-132|PREDICTED: uncharacterized protein LOC101259555 isoform X2 [Solanum lycopersicum]
Solyc10g055760.2	1.18181	2.81381e-64	K00521//ferric-chelate reductase [EC:1.16.1.7];K13126//polyadenylate-binding protein+ko03015//mRNA surveillance pathway+ko03018//RNA degradation+ko03013//RNA transport	GO:0032774//RNA biosynthetic process;GO:1901360//organic cyclic compound metabolic process;GO:0019222//regulation of metabolic process;GO:0010467//gene expression;GO:0034645//cellular macromolecule biosynthetic process;GO:0016070//RNA metabolic process;GO:0019219//regulation of nucleobase-containing compound metabolic process;GO:0044271//cellular nitrogen compound biosynthetic process;GO:0065007/…	XP_004248638.1|5.6e-166|PREDICTED: NAC domain-containing protein 35 [Solanum lycopersicum]
Solyc06g035530.3	1.18075	3.93866e-11	K05282//gibberellin-44 dioxygenase [EC:1.14.11.12]+ko00904//Diterpenoid biosynthesis+ko01100//Metabolic pathways+ko01110//Biosynthesis of secondary metabolites	GO:0043167//ion binding;GO:0005488//binding;GO:0003824//catalytic activity;GO:0016491//oxidoreductase activity;GO:0046872//metal ion binding;GO:0043169//cation binding;	XP_006357900.1|2.2e-208|PREDICTED: gibberellin 20 oxidase 1 [Solanum tuberosum]
Solyc05g005200.3	1.17911	6.95852e-39	K01304//pyroglutamyl-peptidase [EC:3.4.19.3]	GO:0008152//metabolic process;GO:1901564//organonitrogen compound metabolic process;GO:0071704//organic substance metabolic process;GO:0006508//proteolysis;GO:0043170//macromolecule metabolic process;GO:0044238//primary metabolic process;GO:0019538//protein metabolic process;GO:0006807//nitrogen compound metabolic process;GO:0005829//cytosol;GO:0005622//intracellular;GO:0005623//cell;GO:0044464//…	XP_004238653.1|6.9e-122|PREDICTED: uncharacterized protein LOC101247819 isoform X1 [Solanum lycopersicum]
Solyc04g076990.3	1.17882	5.78042e-253	K04733//interleukin-1 receptor-associated kinase 4 [EC:2.7.11.1];K00924//kinase [EC:2.7.1.-]	GO:0006796//phosphate-containing compound metabolic process;GO:0006793//phosphorus metabolic process;GO:0043412//macromolecule modification;GO:0009791//post-embryonic development;GO:0016310//phosphorylation;GO:0009987//cellular process;GO:0043170//macromolecule metabolic process;GO:0006950//response to stress;GO:0044260//cellular macromolecule metabolic process;GO:0006468//protein phosphorylation…	XP_004238042.1|1.9e-300|PREDICTED: receptor-like protein kinase HAIKU2 [Solanum lycopersicum]
Solyc06g075310.3	1.17827	7.36773e-13	K18532//adenylate kinase [EC:2.7.4.3]+ko00230//Purine metabolism+ko01100//Metabolic pathways+ko03008//Ribosome biogenesis in eukaryotes+ko01110//Biosynthesis of secondary metabolites	GO:0045735//nutrient reservoir activity;	XP_004241269.1|2.5e-99|PREDICTED: adenylate kinase isoenzyme 6 homolog isoform X2 [Solanum lycopersicum]
Solyc09g007520.3	1.17812	3.43304e-05	K00430//peroxidase [EC:1.11.1.7]+ko01100//Metabolic pathways+ko01110//Biosynthesis of secondary metabolites+ko00940//Phenylpropanoid biosynthesis	GO:0009664//plant-type cell wall organization;GO:0045229//external encapsulating structure organization;GO:0071840//cellular component organization or biogenesis;GO:0009056//catabolic process;GO:0006979//response to oxidative stress;GO:0071554//cell wall organization or biogenesis;GO:0044237//cellular metabolic process;GO:0051186//cofactor metabolic process;GO:0072593//reactive oxygen species met…	XP_004246673.1|3.5e-188|PREDICTED: peroxidase 21 [Solanum lycopersicum]
Solyc02g077470.3	1.17778	5.47825e-89		GO:0019222//regulation of metabolic process;GO:0019216//regulation of lipid metabolic process;GO:0080090//regulation of primary metabolic process;GO:0050789//regulation of biological process;GO:0065007//biological regulation;GO:0043231//intracellular membrane-bounded organelle;GO:0005737//cytoplasm;GO:0005622//intracellular;GO:0044444//cytoplasmic part;GO:0044424//intracellular part;GO:0005739//m…	OMP10221.1|6.6e-58|Optic atrophy 3-like protein [Corchorus olitorius]
Solyc08g077110.3	1.17659	4.59898e-06	K00521//ferric-chelate reductase [EC:1.16.1.7];K13126//polyadenylate-binding protein+ko03015//mRNA surveillance pathway+ko03018//RNA degradation+ko03013//RNA transport;K12862//pleiotropic regulator 1+ko03040//Spliceosome;K03094//S-phase kinase-associated protein 1+ko04141//Protein processing in endoplasmic reticulum+ko04120//Ubiquitin mediated proteolysis	GO:0034654//nucleobase-containing compound biosynthetic process;GO:0009058//biosynthetic process;GO:1903506//regulation of nucleic acid-templated transcription;GO:0010556//regulation of macromolecule biosynthetic process;GO:2001141//regulation of RNA biosynthetic process;GO:0051171//regulation of nitrogen compound metabolic process;GO:0044260//cellular macromolecule metabolic process;GO:0034641//…	XP_004245880.1|4.7e-195|PREDICTED: NAC domain-containing protein 86-like [Solanum lycopersicum]
Solyc02g090540.3	1.17553	6.14178e-07	K04708//3-dehydrosphinganine reductase [EC:1.1.1.102]+ko00600//Sphingolipid metabolism+ko01100//Metabolic pathways		XP_010316151.1|1.3e-133|PREDICTED: 3-ketodihydrosphingosine reductase isoform X2 [Solanum lycopersicum]
Solyc02g080290.3	1.1729	1.9466e-52	K05350//beta-glucosidase [EC:3.2.1.21]+ko01100//Metabolic pathways+ko00500//Starch and sucrose metabolism+ko01110//Biosynthesis of secondary metabolites+ko00460//Cyanoamino acid metabolism+ko00940//Phenylpropanoid biosynthesis	GO:0071704//organic substance metabolic process;GO:0008152//metabolic process;GO:0044238//primary metabolic process;GO:1901657//glycosyl compound metabolic process;GO:0005975//carbohydrate metabolic process;GO:1901135//carbohydrate derivative metabolic process;GO:0004553//hydrolase activity, hydrolyzing O-glycosyl compounds;GO:0016787//hydrolase activity;GO:0015926//glucosidase activity;GO:000842…	XP_010316602.1|0.0e+00|PREDICTED: beta-glucosidase 18-like [Solanum lycopersicum]
Solyc08g082210.3	1.17021	1.8674e-148	K09286//EREBP-like factor	GO:0009059//macromolecule biosynthetic process;GO:0044271//cellular nitrogen compound biosynthetic process;GO:0046483//heterocycle metabolic process;GO:0043170//macromolecule metabolic process;GO:0044237//cellular metabolic process;GO:0006139//nucleobase-containing compound metabolic process;GO:0006807//nitrogen compound metabolic process;GO:0044260//cellular macromolecule metabolic process;GO:19…	XP_004245520.1|1.7e-118|PREDICTED: ethylene-responsive transcription factor ERF061 [Solanum lycopersicum]
Solyc03g044160.2	1.16904	1.77198e-51	K04733//interleukin-1 receptor-associated kinase 4 [EC:2.7.11.1]	GO:0016020//membrane;GO:0044425//membrane part;GO:0016021//integral component of membrane;GO:0031224//intrinsic component of membrane;GO:0016773//phosphotransferase activity, alcohol group as acceptor;GO:0097367//carbohydrate derivative binding;GO:0140096//catalytic activity, acting on a protein;GO:0016301//kinase activity;GO:0005488//binding;GO:0097159//organic cyclic compound binding;GO:1901363…	XP_004234657.2|1.6e-202|PREDICTED: probable receptor-like protein kinase At5g24010 [Solanum lycopersicum]
Solyc02g068680.1	1.16869	2.29661e-09		GO:0050789//regulation of biological process;GO:0007165//signal transduction;GO:0023052//signaling;GO:0007154//cell communication;GO:0050794//regulation of cellular process;GO:0050896//response to stimulus;GO:0051716//cellular response to stimulus;GO:0035556//intracellular signal transduction;GO:0065007//biological regulation;GO:0009987//cellular process;GO:0044464//cell part;GO:0005622//intracel…	XP_019067587.1|4.7e-288|PREDICTED: uncharacterized protein LOC104646058, partial [Solanum lycopersicum]
Solyc04g079300.3	1.16867	1.29805e-25		GO:0031224//intrinsic component of membrane;GO:0044425//membrane part;GO:0016021//integral component of membrane;GO:0016020//membrane;GO:0016787//hydrolase activity;GO:0003824//catalytic activity;	XP_019245071.1|0.0e+00|PREDICTED: uncharacterized protein LOC109224951 [Nicotiana attenuata]
Solyc06g008620.1	1.16567	2.65416e-124			XP_004240512.1|0.0e+00|PREDICTED: uncharacterized protein LOC101247825 [Solanum lycopersicum]
Solyc10g005630.3	1.16555	1.22967e-30	K04733//interleukin-1 receptor-associated kinase 4 [EC:2.7.11.1]	GO:0019538//protein metabolic process;GO:0032388//positive regulation of intracellular transport;GO:0090316//positive regulation of intracellular protein transport;GO:1903829//positive regulation of cellular protein localization;GO:0006468//protein phosphorylation;GO:0006464//cellular protein modification process;GO:0043170//macromolecule metabolic process;GO:0051050//positive regulation of trans…	XP_004248347.1|2.0e-219|PREDICTED: putative serine/threonine-protein kinase [Solanum lycopersicum]
Solyc04g074080.3	1.16459	1.98158e-146			XP_004237904.1|9.4e-123|PREDICTED: uncharacterized protein LOC101252482 [Solanum lycopersicum]
Solyc02g076930.2	1.16414	1.28851e-05	K08332//vacuolar protein 8	GO:0043226//organelle;GO:0044464//cell part;GO:0043231//intracellular membrane-bounded organelle;GO:0005622//intracellular;GO:0005737//cytoplasm;GO:0044424//intracellular part;GO:0043227//membrane-bounded organelle;GO:0005634//nucleus;GO:0005623//cell;GO:0043229//intracellular organelle;	XP_004233851.1|5.3e-235|PREDICTED: U-box domain-containing protein 7 [Solanum lycopersicum]
Solyc09g089680.3	1.16414	1.28851e-05	K13229//2,4-dihydroxy-1,4-benzoxazin-3-one-glucoside dioxygenase [EC:1.14.11.59]+ko00402//Benzoxazinoid biosynthesis;K06892//feruloyl-CoA ortho-hydroxylase [EC:1.14.11.-]+ko01110//Biosynthesis of secondary metabolites+ko00940//Phenylpropanoid biosynthesis	GO:0016491//oxidoreductase activity;GO:0046872//metal ion binding;GO:0003824//catalytic activity;GO:0043167//ion binding;GO:0043169//cation binding;GO:0005488//binding;	XP_004247710.1|9.9e-215|PREDICTED: 1-aminocyclopropane-1-carboxylate oxidase homolog [Solanum lycopersicum]
Solyc03g121060.3	1.16246	1.22186e-151	K14484//auxin-responsive protein IAA+ko04075//Plant hormone signal transduction	GO:2001141//regulation of RNA biosynthetic process;GO:0042221//response to chemical;GO:0006351//transcription, DNA-templated;GO:0008152//metabolic process;GO:0010033//response to organic substance;GO:0032870//cellular response to hormone stimulus;GO:0051716//cellular response to stimulus;GO:0044271//cellular nitrogen compound biosynthetic process;GO:0043170//macromolecule metabolic process;GO:000…	NP_001266088.1|7.8e-146|IAA26 [Solanum lycopersicum]
Solyc01g006670.2	1.16183	2.00337e-07	K13496//UDP-glucosyl transferase 73C [EC:2.4.1.-]	GO:0008152//metabolic process;GO:0016021//integral component of membrane;GO:0016020//membrane;GO:0031224//intrinsic component of membrane;GO:0044425//membrane part;GO:0016740//transferase activity;GO:0016757//transferase activity, transferring glycosyl groups;GO:0016758//transferase activity, transferring hexosyl groups;GO:0003824//catalytic activity;	XP_015056834.1|1.6e-279|PREDICTED: UDP-glycosyltransferase 92A1-like [Solanum pennellii]
Solyc06g069190.3	1.15891	2.7732e-210	K00924//kinase [EC:2.7.1.-]	GO:0050896//response to stimulus;GO:0009056//catabolic process;GO:1901564//organonitrogen compound metabolic process;GO:0009605//response to external stimulus;GO:0019538//protein metabolic process;GO:0008152//metabolic process;GO:1901565//organonitrogen compound catabolic process;GO:0043207//response to external biotic stimulus;GO:0030163//protein catabolic process;GO:0009607//response to biotic …	NP_001333817.1|3.2e-292|aspartyl protease APCB1-like [Solanum lycopersicum]
Solyc07g061950.3	1.15695	2.78055e-169	K01652//acetolactate synthase I/II/III large subunit [EC:2.2.1.6]+ko00290//Valine, leucine and isoleucine biosynthesis+ko00770//Pantothenate and CoA biosynthesis+ko01230//Biosynthesis of amino acids+ko01100//Metabolic pathways+ko00650//Butanoate metabolism+ko01110//Biosynthesis of secondary metabolites+ko01210//2-Oxocarboxylic acid metabolism+ko00660//C5-Branched dibasic acid metabolism	GO:0044425//membrane part;GO:0031224//intrinsic component of membrane;GO:0016020//membrane;GO:0016021//integral component of membrane;	XP_019070302.1|0.0e+00|PREDICTED: uncharacterized protein LOC101253806 [Solanum lycopersicum]
Solyc00g028960.1	1.15573	1.00476e-08	K03676//glutaredoxin 3	GO:0065007//biological regulation;GO:0050794//regulation of cellular process;GO:0045454//cell redox homeostasis;GO:0019725//cellular homeostasis;GO:0065008//regulation of biological quality;GO:0009987//cellular process;GO:0050789//regulation of biological process;GO:0042592//homeostatic process;GO:0005623//cell;GO:0015036//disulfide oxidoreductase activity;GO:0015035//protein disulfide oxidoreduc…	XP_004253341.1|4.2e-51|PREDICTED: monothiol glutaredoxin-S1-like [Solanum lycopersicum]
Solyc02g062800.2	1.15484	1.36411e-41	K08770//ubiquitin C		XP_004233516.1|7.9e-240|PREDICTED: F-box protein At3g26010 [Solanum lycopersicum]
Solyc01g109720.3	1.15427	1.49422e-20	K22369//epoxide hydrolase 4 [EC:3.3.-.-]	GO:0003824//catalytic activity;	XP_004230956.1|8.7e-168|PREDICTED: monoacylglycerol lipase abhd6-A [Solanum lycopersicum]
Solyc03g095377.1	1.15404	0.000132486
Solyc12g045020.2	1.15207	0.000623326	K20562//biphenyl-4-hydroxylase	GO:0044550//secondary metabolite biosynthetic process;GO:0009058//biosynthetic process;GO:0019748//secondary metabolic process;GO:0008152//metabolic process;GO:0016020//membrane;GO:0046906//tetrapyrrole binding;GO:0016491//oxidoreductase activity;GO:0046872//metal ion binding;GO:0048037//cofactor binding;GO:0020037//heme binding;GO:0003824//catalytic activity;GO:0005488//binding;GO:0016705//oxido…	XP_004252382.1|6.9e-289|PREDICTED: cytochrome P450 CYP736A12 [Solanum lycopersicum]
Solyc11g073080.2	1.15173	1.69057e-15		GO:0043227//membrane-bounded organelle;GO:0044424//intracellular part;GO:0043231//intracellular membrane-bounded organelle;GO:0043229//intracellular organelle;GO:0044464//cell part;GO:0005622//intracellular;GO:0005634//nucleus;GO:0043226//organelle;GO:0005623//cell;GO:0003676//nucleic acid binding;GO:0005488//binding;GO:0003677//DNA binding;GO:0097159//organic cyclic compound binding;GO:1901363//…	XP_004251455.1|3.6e-158|PREDICTED: methyl-CpG-binding domain-containing protein 7 isoform X1 [Solanum lycopersicum]
Solyc01g102880.2	1.1516	2.13251e-27	K22038//volume-regulated anion channel	GO:0050794//regulation of cellular process;GO:0009987//cellular process;GO:0023052//signaling;GO:0007165//signal transduction;GO:0051716//cellular response to stimulus;GO:0050789//regulation of biological process;GO:0007154//cell communication;GO:0050896//response to stimulus;GO:0065007//biological regulation;GO:0043168//anion binding;GO:0043531//ADP binding;GO:0032553//ribonucleotide binding;GO:…	XP_015082006.1|0.0e+00|PREDICTED: uncharacterized protein LOC107025773 [Solanum pennellii]
Solyc04g079230.3	1.15125	2.22885e-280		GO:0016042//lipid catabolic process;GO:0006629//lipid metabolic process;GO:0009056//catabolic process;GO:0044238//primary metabolic process;GO:0071704//organic substance metabolic process;GO:1901575//organic substance catabolic process;GO:0008152//metabolic process;GO:0003824//catalytic activity;GO:0016787//hydrolase activity;	XP_015072153.1|4.1e-69|PREDICTED: patatin-like protein 2 [Solanum pennellii]
Solyc11g011085.1	1.15091	1.33967e-07
Solyc02g080995.1	1.14987	3.59805e-18	K15601//lysine-specific demethylase 3 [EC:1.14.11.-]	GO:0008168//methyltransferase activity;GO:0016740//transferase activity;GO:0016741//transferase activity, transferring one-carbon groups;GO:0003824//catalytic activity;	XP_004233782.1|1.8e-36|PREDICTED: lysine-specific demethylase JMJ25 [Solanum lycopersicum]
Solyc11g005640.2	1.14958	5.25521e-59	K04733//interleukin-1 receptor-associated kinase 4 [EC:2.7.11.1]	GO:0048544//recognition of pollen;GO:0009987//cellular process;GO:0009856//pollination;GO:0006796//phosphate-containing compound metabolic process;GO:0006807//nitrogen compound metabolic process;GO:0044238//primary metabolic process;GO:0043170//macromolecule metabolic process;GO:0007154//cell communication;GO:0022414//reproductive process;GO:0016310//phosphorylation;GO:0006464//cellular protein m…	XP_004249884.1|0.0e+00|PREDICTED: G-type lectin S-receptor-like serine/threonine-protein kinase LECRK3 [Solanum lycopersicum]
Solyc04g072375.1	1.14841	2.52512e-11	K16282//E3 ubiquitin-protein ligase RHA2 [EC:2.3.2.27]	GO:0044425//membrane part;GO:0031224//intrinsic component of membrane;GO:0016021//integral component of membrane;GO:0016020//membrane;GO:0003824//catalytic activity;GO:0016874//ligase activity;	XP_009598509.1|4.3e-66|PREDICTED: RING-H2 finger protein ATL56-like [Nicotiana tomentosiformis]
Solyc02g079440.2	1.14795	1.44081e-12	K22395//cinnamyl-alcohol dehydrogenase [EC:1.1.1.195]+ko01100//Metabolic pathways+ko01110//Biosynthesis of secondary metabolites+ko00940//Phenylpropanoid biosynthesis	GO:0000166//nucleotide binding;GO:0050660//flavin adenine dinucleotide binding;GO:0050662//coenzyme binding;GO:1901265//nucleoside phosphate binding;GO:0043168//anion binding;GO:0016614//oxidoreductase activity, acting on CH-OH group of donors;GO:0048037//cofactor binding;GO:0036094//small molecule binding;GO:0005488//binding;GO:1901363//heterocyclic compound binding;GO:0003824//catalytic activit…	XP_004232774.1|0.0e+00|PREDICTED: cannabidiolic acid synthase-like 2 [Solanum lycopersicum]
Solyc10g079320.2	1.14662	1.93715e-27	K13495//cis-zeatin O-glucosyltransferase [EC:2.4.1.215]+ko00908//Zeatin biosynthesis	GO:0008152//metabolic process;GO:0016758//transferase activity, transferring hexosyl groups;GO:0003824//catalytic activity;GO:0016740//transferase activity;GO:0016757//transferase activity, transferring glycosyl groups;	XP_004249738.1|2.0e-281|PREDICTED: zeatin O-glucosyltransferase-like [Solanum lycopersicum]
Solyc01g006320.3	1.14646	7.78978e-67		GO:0050896//response to stimulus;GO:0006950//response to stress;GO:0006952//defense response;GO:0005911//cell-cell junction;GO:0016021//integral component of membrane;GO:0031226//intrinsic component of plasma membrane;GO:0009506//plasmodesma;GO:0005886//plasma membrane;GO:0055044//symplast;GO:0044459//plasma membrane part;GO:0016020//membrane;GO:0044464//cell part;GO:0044425//membrane part;GO:003…	XP_004228724.1|7.0e-80|PREDICTED: protein NDR1-like [Solanum lycopersicum]
Solyc03g115163.1	1.14573	0.000441864
Solyc01g106630.2	1.14559	1.83933e-36	K13449//pathogenesis-related protein 1+ko04016//MAPK signaling pathway - plant+ko04626//Plant-pathogen interaction+ko04075//Plant hormone signal transduction	GO:0005576//extracellular region;	NP_001234358.1|1.2e-106|PR1 protein precursor [Solanum lycopersicum]
Solyc08g078300.3	1.14395	8.51819e-196	K09338//homeobox-leucine zipper protein	GO:0051716//cellular response to stimulus;GO:0048856//anatomical structure development;GO:0051253//negative regulation of RNA metabolic process;GO:0010556//regulation of macromolecule biosynthetic process;GO:2001141//regulation of RNA biosynthetic process;GO:2000112//regulation of cellular macromolecule biosynthetic process;GO:0019222//regulation of metabolic process;GO:0050896//response to stimu…	NP_001335344.1|6.6e-157|homeobox-leucine zipper protein HB2-like [Solanum lycopersicum]
Solyc09g059430.3	1.14164	3.3373e-43	K13456//RPM1-interacting protein 4+ko04626//Plant-pathogen interaction		XP_010326285.1|1.1e-153|PREDICTED: RPM1-interacting protein 4 isoform X2 [Solanum lycopersicum]
Solyc03g094160.3	1.14154	3.13533e-53	K22684//metacaspase-1 [EC:3.4.22.-]		XP_004235205.1|3.6e-213|PREDICTED: metacaspase-1-like [Solanum lycopersicum]
Solyc01g098530.3	1.14063	1.50153e-07	K01937//CTP synthase [EC:6.3.4.2]+ko01100//Metabolic pathways+ko00240//Pyrimidine metabolism	GO:0034641//cellular nitrogen compound metabolic process;GO:0055086//nucleobase-containing small molecule metabolic process;GO:0044237//cellular metabolic process;GO:0009209//pyrimidine ribonucleoside triphosphate biosynthetic process;GO:0019637//organophosphate metabolic process;GO:0009987//cellular process;GO:0044238//primary metabolic process;GO:0019438//aromatic compound biosynthetic process;…	XP_010316211.1|8.9e-23|PREDICTED: CTP synthase 2 isoform X1 [Solanum lycopersicum]
Solyc00g080750.3	1.13975	9.11972e-29	K15255//ATP-dependent DNA helicase PIF1 [EC:3.6.4.12]		XP_004253408.1|1.6e-128|PREDICTED: uncharacterized protein At1g66480-like isoform X1 [Solanum lycopersicum]
Solyc06g008790.3	1.13152	2.98673e-05	K13453//disease resistance protein+ko04626//Plant-pathogen interaction;K14497//protein phosphatase 2C [EC:3.1.3.16]+ko04016//MAPK signaling pathway - plant+ko04075//Plant hormone signal transduction	GO:0051716//cellular response to stimulus;GO:0006950//response to stress;GO:0009987//cellular process;GO:0050896//response to stimulus;GO:0065007//biological regulation;GO:0023052//signaling;GO:0006952//defense response;GO:0050789//regulation of biological process;GO:0007154//cell communication;GO:0050794//regulation of cellular process;GO:0007165//signal transduction;GO:0016020//membrane;GO:0071…	NP_001318035.1|0.0e+00|NBS-LRR resistance protein-like protein [Solanum lycopersicum]
Solyc06g076570.3	1.13078	1.11295e-99	K13993//HSP20 family protein+ko04141//Protein processing in endoplasmic reticulum		NP_001307191.1|4.9e-82|class I small heat shock protein [Solanum lycopersicum]
Solyc11g007030.2	1.12706	8.92243e-05	K20363//protein YIPF5/7;K02952//small subunit ribosomal protein S13+ko03010//Ribosome		XP_015170771.1|4.0e-231|PREDICTED: uncharacterized protein LOC102603800 isoform X2 [Solanum tuberosum]
Solyc06g009890.2	1.1266	5.77207e-13			OWM67772.1|1.2e-12|hypothetical protein CDL15_Pgr017469 [Punica granatum]
Solyc01g106620.2	1.12424	1.00702e-62	K13449//pathogenesis-related protein 1+ko04016//MAPK signaling pathway - plant+ko04626//Plant-pathogen interaction+ko04075//Plant hormone signal transduction	GO:0005576//extracellular region;	NP_001234358.1|1.2e-106|PR1 protein precursor [Solanum lycopersicum]
Solyc09g056395.1	1.12341	0.000361711	K05665//ATP-binding cassette, subfamily C (CFTR/MRP), member 1 [EC:7.6.2.3]+ko02010//ABC transporters;K13420//LRR receptor-like serine/threonine-protein kinase FLS2 [EC:2.7.11.1]+ko04016//MAPK signaling pathway - plant+ko04626//Plant-pathogen interaction		XP_016473711.1|9.6e-36|PREDICTED: uncharacterized protein LOC107795559 [Nicotiana tabacum]
Solyc12g096350.2	1.1228	2.16169e-21	K13425//WRKY transcription factor 22+ko04016//MAPK signaling pathway - plant+ko04626//Plant-pathogen interaction	GO:0034645//cellular macromolecule biosynthetic process;GO:0009059//macromolecule biosynthetic process;GO:0034641//cellular nitrogen compound metabolic process;GO:0006139//nucleobase-containing compound metabolic process;GO:0016070//RNA metabolic process;GO:0090304//nucleic acid metabolic process;GO:0044260//cellular macromolecule metabolic process;GO:0044249//cellular biosynthetic process;GO:001…	NP_001308135.1|5.2e-191|probable WRKY transcription factor 17 [Solanum lycopersicum]
Solyc02g076850.2	1.12171	7.57859e-05	K16222//Dof zinc finger protein DOF5.5+ko04712//Circadian rhythm - plant	GO:0031326//regulation of cellular biosynthetic process;GO:0010468//regulation of gene expression;GO:1903506//regulation of nucleic acid-templated transcription;GO:0051252//regulation of RNA metabolic process;GO:2000112//regulation of cellular macromolecule biosynthetic process;GO:0051171//regulation of nitrogen compound metabolic process;GO:0031323//regulation of cellular metabolic process;GO:00…	XP_010316809.1|5.7e-95|PREDICTED: dof zinc finger protein DOF1.5 [Solanum lycopersicum]
Solyc06g007120.3	1.12138	2.12836e-283	K05857//phosphatidylinositol phospholipase C, delta [EC:3.1.4.11]+ko01100//Metabolic pathways+ko04933//AGE-RAGE signaling pathway in diabetic complications+ko04070//Phosphatidylinositol signaling system+ko00562//Inositol phosphate metabolism	GO:0050896//response to stimulus;GO:0051716//cellular response to stimulus;GO:0050794//regulation of cellular process;GO:0035556//intracellular signal transduction;GO:0050789//regulation of biological process;GO:0007154//cell communication;GO:0016042//lipid catabolic process;GO:0009056//catabolic process;GO:0071704//organic substance metabolic process;GO:0007165//signal transduction;GO:0006629//l…	NP_001234181.1|0.0e+00|PI-phospholipase C PLC4 [Solanum lycopersicum]
Solyc01g005720.3	1.121	3.6295e-41	K13420//LRR receptor-like serine/threonine-protein kinase FLS2 [EC:2.7.11.1]+ko04016//MAPK signaling pathway - plant+ko04626//Plant-pathogen interaction	GO:0016020//membrane;GO:0016021//integral component of membrane;GO:0031224//intrinsic component of membrane;GO:0044425//membrane part;	AAV41395.1|4.8e-234|peru 1 [Solanum peruvianum]
Solyc06g071930.1	1.12021	5.65908e-13			XP_006347400.1|1.7e-29|PREDICTED: uncharacterized protein LOC102605400 [Solanum tuberosum]
Solyc07g053130.3	1.12007	1.92954e-57	K04733//interleukin-1 receptor-associated kinase 4 [EC:2.7.11.1]	GO:0022414//reproductive process;GO:0007154//cell communication;GO:0000003//reproduction;GO:0048544//recognition of pollen;GO:0032501//multicellular organismal process;GO:0009875//pollen-pistil interaction;GO:0009856//pollination;GO:0051704//multi-organism process;GO:0044706//multi-multicellular organism process;GO:0009987//cellular process;GO:0008037//cell recognition;GO:0044425//membrane part;G…	XP_010323780.1|0.0e+00|PREDICTED: G-type lectin S-receptor-like serine/threonine-protein kinase At4g03230 [Solanum lycopersicum]
Solyc08g066020.2	1.11881	2.71672e-17	K00654//serine palmitoyltransferase [EC:2.3.1.50]+ko00600//Sphingolipid metabolism+ko01100//Metabolic pathways	GO:0009058//biosynthetic process;GO:0008152//metabolic process;GO:0043168//anion binding;GO:0043167//ion binding;GO:0036094//small molecule binding;GO:0019842//vitamin binding;GO:1901363//heterocyclic compound binding;GO:0048037//cofactor binding;GO:0008144//drug binding;GO:0003824//catalytic activity;GO:0005488//binding;GO:0030170//pyridoxal phosphate binding;GO:0050662//coenzyme binding;GO:0070…	XP_004245133.1|2.8e-155|PREDICTED: long chain base biosynthesis protein 1-like [Solanum lycopersicum]
Solyc11g011650.1	1.1179	5.84396e-06	K14488//SAUR family protein+ko04075//Plant hormone signal transduction	GO:0009733//response to auxin;GO:0010033//response to organic substance;GO:0042221//response to chemical;GO:0009725//response to hormone;GO:0050896//response to stimulus;GO:0009719//response to endogenous stimulus;	XP_004250217.2|1.4e-45|PREDICTED: auxin-responsive protein SAUR21-like [Solanum lycopersicum]
Solyc07g021630.3	1.11747	1.12116e-15	K00826//branched-chain amino acid aminotransferase [EC:2.6.1.42]+ko00290//Valine, leucine and isoleucine biosynthesis+ko00280//Valine, leucine and isoleucine degradation+ko00770//Pantothenate and CoA biosynthesis+ko01230//Biosynthesis of amino acids+ko01100//Metabolic pathways+ko01110//Biosynthesis of secondary metabolites+ko01210//2-Oxocarboxylic acid metabolism+ko00270//Cysteine and methionine …	GO:0016053//organic acid biosynthetic process;GO:0009081//branched-chain amino acid metabolic process;GO:0008652//cellular amino acid biosynthetic process;GO:0006082//organic acid metabolic process;GO:0043436//oxoacid metabolic process;GO:0071704//organic substance metabolic process;GO:0009987//cellular process;GO:0044281//small molecule metabolic process;GO:0044283//small molecule biosynthetic p…	XP_019070194.1|4.2e-219|PREDICTED: branched-chain-amino-acid aminotransferase 2, chloroplastic-like isoform X1 [Solanum lycopersicum]
Solyc04g079210.3	1.11521	0		GO:0044238//primary metabolic process;GO:0006629//lipid metabolic process;GO:0016042//lipid catabolic process;GO:1901575//organic substance catabolic process;GO:0009056//catabolic process;GO:0071704//organic substance metabolic process;GO:0008152//metabolic process;GO:0016787//hydrolase activity;GO:0003824//catalytic activity;	XP_015072153.1|1.2e-127|PREDICTED: patatin-like protein 2 [Solanum pennellii]
Solyc08g066400.2	1.11467	2.87918e-36	K02218//casein kinase 1 [EC:2.7.11.1];K08960//casein kinase 1, epsilon [EC:2.7.11.1];K20476//RAB6A-GEF complex partner protein 1		ONM28581.1|2.1e-77|Protein kinase family protein [Zea mays]
Solyc09g010780.3	1.11414	3.14385e-32	K01102//pyruvate dehydrogenase phosphatase [EC:3.1.3.43]	GO:0016788//hydrolase activity, acting on ester bonds;GO:0003824//catalytic activity;GO:0042578//phosphoric ester hydrolase activity;GO:0004722//protein serine/threonine phosphatase activity;GO:0140096//catalytic activity, acting on a protein;GO:0016787//hydrolase activity;GO:0004721//phosphoprotein phosphatase activity;GO:0016791//phosphatase activity;	XP_004246408.1|0.0e+00|PREDICTED: probable protein phosphatase 2C 23 [Solanum lycopersicum]
Solyc12g008500.2	1.11115	1.54095e-22	K00924//kinase [EC:2.7.1.-]	GO:0044425//membrane part;GO:0016021//integral component of membrane;GO:0016020//membrane;GO:0031224//intrinsic component of membrane;GO:0097159//organic cyclic compound binding;GO:0016772//transferase activity, transferring phosphorus-containing groups;GO:0005488//binding;GO:0016773//phosphotransferase activity, alcohol group as acceptor;GO:0016301//kinase activity;GO:0017076//purine nucleotide …	XP_004251639.1|0.0e+00|PREDICTED: receptor-like protein kinase 5 [Solanum lycopersicum]
Solyc12g096880.2	1.11101	0.000277494	K13414//mitogen-activated protein kinase kinase kinase 1 [EC:2.7.11.25]+ko04016//MAPK signaling pathway - plant+ko04626//Plant-pathogen interaction;K08852//serine/threonine-protein kinase/endoribonuclease IRE1 [EC:2.7.11.1 3.1.26.-]+ko04141//Protein processing in endoplasmic reticulum;K13459//disease resistance protein RPS2+ko04626//Plant-pathogen interaction	GO:0050896//response to stimulus;GO:0009987//cellular process;GO:0051716//cellular response to stimulus;GO:0050789//regulation of biological process;GO:0065007//biological regulation;GO:0023052//signaling;GO:0050794//regulation of cellular process;GO:0007154//cell communication;GO:0007165//signal transduction;	XP_004253177.1|7.7e-114|PREDICTED: protein PHLOEM PROTEIN 2-LIKE A5 [Solanum lycopersicum]
Solyc09g082890.2	1.10819	0.000561682	K01537//Ca2+-transporting ATPase [EC:3.6.3.8]	GO:0044425//membrane part;GO:0016020//membrane;GO:0016021//integral component of membrane;GO:0031224//intrinsic component of membrane;GO:0032559//adenyl ribonucleotide binding;GO:0042626//ATPase activity, coupled to transmembrane movement of substances;GO:0016787//hydrolase activity;GO:0015405//P-P-bond-hydrolysis-driven transmembrane transporter activity;GO:0022890//inorganic cation transmembran…	XP_015086720.1|6.6e-211|PREDICTED: putative calcium-transporting ATPase 13, plasma membrane-type [Solanum pennellii]
Solyc12g009520.2	1.10767	2.82253e-21	K13420//LRR receptor-like serine/threonine-protein kinase FLS2 [EC:2.7.11.1]+ko04016//MAPK signaling pathway - plant+ko04626//Plant-pathogen interaction		XP_010313777.2|0.0e+00|PREDICTED: receptor like protein 30-like [Solanum lycopersicum]
Solyc08g066790.3	1.10708	2.28492e-40	K01115//phospholipase D1/2 [EC:3.1.4.4]+ko04144//Endocytosis+ko01100//Metabolic pathways+ko01110//Biosynthesis of secondary metabolites+ko00564//Glycerophospholipid metabolism+ko00565//Ether lipid metabolism	GO:0008152//metabolic process;GO:0016042//lipid catabolic process;GO:0046486//glycerolipid metabolic process;GO:0044255//cellular lipid metabolic process;GO:0006650//glycerophospholipid metabolic process;GO:0009987//cellular process;GO:0006807//nitrogen compound metabolic process;GO:0006644//phospholipid metabolic process;GO:0006629//lipid metabolic process;GO:0006793//phosphorus metabolic proces…	XP_015084945.1|0.0e+00|PREDICTED: phospholipase D alpha 1-like [Solanum pennellii]
Solyc03g115370.3	1.10676	3.38179e-62	K00901//diacylglycerol kinase (ATP) [EC:2.7.1.107]+ko01100//Metabolic pathways+ko01110//Biosynthesis of secondary metabolites+ko04070//Phosphatidylinositol signaling system+ko00564//Glycerophospholipid metabolism+ko00561//Glycerolipid metabolism	GO:0050789//regulation of biological process;GO:0050896//response to stimulus;GO:0035556//intracellular signal transduction;GO:0023052//signaling;GO:0009987//cellular process;GO:0051716//cellular response to stimulus;GO:0007154//cell communication;GO:0007205//protein kinase C-activating G protein-coupled receptor signaling pathway;GO:0065007//biological regulation;GO:0050794//regulation of cellul…	XP_004235974.1|0.0e+00|PREDICTED: diacylglycerol kinase 1-like isoform X1 [Solanum lycopersicum]
Solyc04g076695.1	1.1062	7.08071e-06	K09264//MADS-box transcription factor, plant	GO:0031323//regulation of cellular metabolic process;GO:0034645//cellular macromolecule biosynthetic process;GO:1901362//organic cyclic compound biosynthetic process;GO:0006807//nitrogen compound metabolic process;GO:0071704//organic substance metabolic process;GO:0008152//metabolic process;GO:0090304//nucleic acid metabolic process;GO:0006357//regulation of transcription by RNA polymerase II;GO:…	XP_015073942.1|5.7e-44|PREDICTED: MADS-box transcription factor 23-like isoform X1 [Solanum pennellii]
Solyc11g056620.2	1.10458	2.4152e-28	K03495//tRNA uridine 5-carboxymethylaminomethyl modification enzyme		XP_004250856.1|3.5e-281|PREDICTED: uncharacterized protein LOC101262986 [Solanum lycopersicum]
Solyc06g008050.3	1.1035	1.29221e-25	K11816//indole-3-pyruvate monooxygenase [EC:1.14.13.168]+ko00380//Tryptophan metabolism+ko01100//Metabolic pathways	GO:0044425//membrane part;GO:0016021//integral component of membrane;GO:0031224//intrinsic component of membrane;GO:0016020//membrane;GO:0000166//nucleotide binding;GO:0050660//flavin adenine dinucleotide binding;GO:0048037//cofactor binding;GO:0005488//binding;GO:1901363//heterocyclic compound binding;GO:1901265//nucleoside phosphate binding;GO:0043167//ion binding;GO:0050662//coenzyme binding;G…	XP_004247118.1|6.6e-175|PREDICTED: probable indole-3-pyruvate monooxygenase YUCCA5 [Solanum lycopersicum]
Solyc02g079590.3	1.10276	2.61125e-137	K04733//interleukin-1 receptor-associated kinase 4 [EC:2.7.11.1]	GO:0032501//multicellular organismal process;GO:0009987//cellular process;GO:0022414//reproductive process;GO:0044706//multi-multicellular organism process;GO:0008037//cell recognition;GO:0009875//pollen-pistil interaction;GO:0051704//multi-organism process;GO:0000003//reproduction;GO:0048544//recognition of pollen;GO:0007154//cell communication;GO:0009856//pollination;GO:0044425//membrane part;G…	XP_015064841.1|0.0e+00|PREDICTED: uncharacterized protein LOC107010091 [Solanum pennellii]
Solyc10g076250.2	1.10156	7.13424e-32	K00827//alanine-glyoxylate transaminase / (R)-3-amino-2-methylpropionate-pyruvate transaminase [EC:2.6.1.44 2.6.1.40]+ko00250//Alanine, aspartate and glutamate metabolism+ko00280//Valine, leucine and isoleucine degradation+ko01100//Metabolic pathways+ko01110//Biosynthesis of secondary metabolites+ko00260//Glycine, serine and threonine metabolism+ko00270//Cysteine and methionine metabolism	GO:0070279//vitamin B6 binding;GO:0050662//coenzyme binding;GO:0008483//transaminase activity;GO:1901363//heterocyclic compound binding;GO:0016769//transferase activity, transferring nitrogenous groups;GO:0003824//catalytic activity;GO:0005488//binding;GO:0008144//drug binding;GO:0019842//vitamin binding;GO:0048037//cofactor binding;GO:0036094//small molecule binding;GO:0030170//pyridoxal phospha…	XP_015897669.1|1.3e-221|PREDICTED: alanine--glyoxylate aminotransferase 2 homolog 3, mitochondrial [Ziziphus jujuba]
Solyc10g081170.2	1.10003	0	K02183//calmodulin+ko04016//MAPK signaling pathway - plant+ko04626//Plant-pathogen interaction+ko04070//Phosphatidylinositol signaling system		OIT21873.1|2.2e-79|calmodulin-7, partial [Nicotiana attenuata]
Solyc02g085310.3	1.0998	5.37044e-31
Solyc08g067310.1	1.09722	4.64466e-12	K07198//5'-AMP-activated protein kinase, catalytic alpha subunit [EC:2.7.11.11]	GO:0065007//biological regulation;GO:0006807//nitrogen compound metabolic process;GO:0071704//organic substance metabolic process;GO:0006464//cellular protein modification process;GO:0044238//primary metabolic process;GO:0035556//intracellular signal transduction;GO:0050896//response to stimulus;GO:0044267//cellular protein metabolic process;GO:0018107//peptidyl-threonine phosphorylation;GO:00507…	XP_004245209.1|4.8e-261|PREDICTED: CBL-interacting serine/threonine-protein kinase 5-like [Solanum lycopersicum]
Solyc10g047643.1	1.09699	1.20853e-22	K22759//coiled-coil-helix-coiled-coil-helix domain-containing protein 10	GO:0007005//mitochondrion organization;GO:0071840//cellular component organization or biogenesis;GO:0016043//cellular component organization;GO:0009987//cellular process;GO:0006996//organelle organization;GO:0044444//cytoplasmic part;GO:0005622//intracellular;GO:0044424//intracellular part;GO:0005737//cytoplasm;GO:0043229//intracellular organelle;GO:0005739//mitochondrion;GO:0043226//organelle;GO…	XP_004248791.1|1.2e-59|PREDICTED: uncharacterized protein C6C3.02c [Solanum lycopersicum]
Solyc06g051970.3	1.09596	1.62265e-05	K06268//serine/threonine-protein phosphatase 2B regulatory subunit	GO:0031224//intrinsic component of membrane;GO:0044425//membrane part;GO:0016021//integral component of membrane;GO:0016020//membrane;GO:0043167//ion binding;GO:0005488//binding;GO:0005509//calcium ion binding;GO:0043169//cation binding;GO:0046872//metal ion binding;	XP_004240957.1|1.2e-117|PREDICTED: calcineurin B-like protein 4 [Solanum lycopersicum]
Solyc01g108910.3	1.09527	0		GO:0048731//system development;GO:0009607//response to biotic stimulus;GO:0098542//defense response to other organism;GO:0043207//response to external biotic stimulus;GO:0003006//developmental process involved in reproduction;GO:0009793//embryo development ending in seed dormancy;GO:0009620//response to fungus;GO:0061458//reproductive system development;GO:0050918//positive chemotaxis;GO:0022414/…	XP_004230833.1|1.3e-108|PREDICTED: CCG-binding protein 1 [Solanum lycopersicum]
Solyc00g102400.3	1.09495	6.76428e-08	K13453//disease resistance protein+ko04626//Plant-pathogen interaction;K14497//protein phosphatase 2C [EC:3.1.3.16]+ko04016//MAPK signaling pathway - plant+ko04075//Plant hormone signal transduction	GO:0050794//regulation of cellular process;GO:0006952//defense response;GO:0007154//cell communication;GO:0007165//signal transduction;GO:0050789//regulation of biological process;GO:0023052//signaling;GO:0006950//response to stress;GO:0065007//biological regulation;GO:0051716//cellular response to stimulus;GO:0050896//response to stimulus;GO:0009987//cellular process;GO:0005623//cell;GO:0044464/…	ABI96211.1|0.0e+00|NBS-LRR resistance protein-like protein [Solanum sp. VFNT]
Solyc05g011970.3	1.09494	3.57331e-38	K15639//PHYB activation tagged suppressor 1 [EC:1.14.-.-]+ko00905//Brassinosteroid biosynthesis	GO:0044425//membrane part;GO:0016020//membrane;GO:0031224//intrinsic component of membrane;GO:0016021//integral component of membrane;GO:0005506//iron ion binding;GO:0043167//ion binding;GO:0020037//heme binding;GO:0005488//binding;GO:0004497//monooxygenase activity;GO:0016705//oxidoreductase activity, acting on paired donors, with incorporation or reduction of molecular oxygen;GO:0046906//tetrap…	XP_004239025.1|9.7e-305|PREDICTED: cytochrome P450 CYP749A22-like isoform X1 [Solanum lycopersicum]
Solyc01g110843.1	1.09395	2.70174e-06	K14488//SAUR family protein+ko04075//Plant hormone signal transduction	GO:0010033//response to organic substance;GO:0042221//response to chemical;GO:0009733//response to auxin;GO:0009719//response to endogenous stimulus;GO:0050896//response to stimulus;GO:0009725//response to hormone;	XP_015083273.1|2.5e-48|PREDICTED: auxin-responsive protein SAUR21-like [Solanum pennellii]
Solyc05g009000.3	1.09384	3.97943e-22	K04733//interleukin-1 receptor-associated kinase 4 [EC:2.7.11.1]	GO:0031224//intrinsic component of membrane;GO:0044425//membrane part;GO:0016021//integral component of membrane;GO:0016020//membrane;GO:0000166//nucleotide binding;GO:0032555//purine ribonucleotide binding;GO:0030554//adenyl nucleotide binding;GO:0003824//catalytic activity;GO:1901265//nucleoside phosphate binding;GO:0043168//anion binding;GO:1901363//heterocyclic compound binding;GO:0016740//tr…	XP_004238904.1|1.0e-200|PREDICTED: LEAF RUST 10 DISEASE-RESISTANCE LOCUS RECEPTOR-LIKE PROTEIN KINASE-like 1.1 [Solanum lycopersicum]
Solyc11g045520.2	1.0917	5.72406e-09	K23145//scopoletin 8-hydroxylase [EC:1.14.11.60]	GO:0034599//cellular response to oxidative stress;GO:0051716//cellular response to stimulus;GO:0000302//response to reactive oxygen species;GO:0009719//response to endogenous stimulus;GO:0071241//cellular response to inorganic substance;GO:0042493//response to drug;GO:0071495//cellular response to endogenous stimulus;GO:0010038//response to metal ion;GO:0033554//cellular response to stress;GO:190…	XP_004250780.1|2.7e-211|PREDICTED: feruloyl CoA ortho-hydroxylase 1 [Solanum lycopersicum]
Solyc06g069640.3	1.0917	7.38734e-08	K16904//dCTP diphosphatase [EC:3.6.1.12]+ko01100//Metabolic pathways+ko00240//Pyrimidine metabolism	GO:0006807//nitrogen compound metabolic process;GO:0009143//nucleoside triphosphate catabolic process;GO:0009056//catabolic process;GO:0006753//nucleoside phosphate metabolic process;GO:0009987//cellular process;GO:0009141//nucleoside triphosphate metabolic process;GO:1901292//nucleoside phosphate catabolic process;GO:0071704//organic substance metabolic process;GO:0006796//phosphate-containing c…	XP_004241589.1|1.5e-66|PREDICTED: dCTP pyrophosphatase 1-like [Solanum lycopersicum]
Solyc07g044980.3	1.09006	9.31158e-137	K14508//regulatory protein NPR1+ko04075//Plant hormone signal transduction	GO:0036211//protein modification process;GO:0044267//cellular protein metabolic process;GO:0044238//primary metabolic process;GO:0032446//protein modification by small protein conjugation;GO:0010498//proteasomal protein catabolic process;GO:1901565//organonitrogen compound catabolic process;GO:0016567//protein ubiquitination;GO:0030162//regulation of proteolysis;GO:0009056//catabolic process;GO:0…	NP_001233844.1|0.0e+00|NIM1-like protein 2 [Solanum lycopersicum]
Solyc01g009860.3	1.08922	5.72635e-295	K00521//ferric-chelate reductase [EC:1.16.1.7];K16296//serine carboxypeptidase-like clade I [EC:3.4.16.-]	GO:0050794//regulation of cellular process;GO:0006355//regulation of transcription, DNA-templated;GO:0097659//nucleic acid-templated transcription;GO:0044260//cellular macromolecule metabolic process;GO:1903506//regulation of nucleic acid-templated transcription;GO:0034645//cellular macromolecule biosynthetic process;GO:0065007//biological regulation;GO:1901362//organic cyclic compound biosynthet…	NP_001233811.1|4.6e-156|uncharacterized protein LOC100147720 [Solanum lycopersicum]
Solyc07g007125.1	1.08783	0.000153722	K04422//mitogen-activated protein kinase kinase kinase 13 [EC:2.7.11.25]	GO:0044238//primary metabolic process;GO:0071704//organic substance metabolic process;GO:0050896//response to stimulus;GO:0023052//signaling;GO:0044260//cellular macromolecule metabolic process;GO:0043412//macromolecule modification;GO:0008152//metabolic process;GO:0006796//phosphate-containing compound metabolic process;GO:0019538//protein metabolic process;GO:0006793//phosphorus metabolic proce…	XP_019170612.1|2.2e-29|PREDICTED: uncharacterized protein LOC109166170 [Ipomoea nil]
Solyc01g111430.2	1.08576	3.05558e-21	K01176//alpha-amylase [EC:3.2.1.1]+ko01100//Metabolic pathways+ko00500//Starch and sucrose metabolism		XP_019068507.1|0.0e+00|PREDICTED: pentatricopeptide repeat-containing protein At3g03580-like [Solanum lycopersicum]
Solyc01g105435.1	1.08542	1.36714e-12	K05681//ATP-binding cassette, subfamily G (WHITE), member 2+ko02010//ABC transporters	GO:0016020//membrane;GO:0016021//integral component of membrane;GO:0031224//intrinsic component of membrane;GO:0044425//membrane part;GO:0043167//ion binding;GO:0016818//hydrolase activity, acting on acid anhydrides, in phosphorus-containing anhydrides;GO:1901363//heterocyclic compound binding;GO:0097159//organic cyclic compound binding;GO:0017076//purine nucleotide binding;GO:0016887//ATPase act…	XP_015062890.1|0.0e+00|PREDICTED: ABC transporter G family member 11-like [Solanum pennellii]
Solyc05g053960.3	1.08472	2.18846e-05			XP_004239837.1|4.1e-116|PREDICTED: uncharacterized protein LOC101252396 [Solanum lycopersicum]
Solyc02g068820.2	1.08433	2.76596e-136	K13420//LRR receptor-like serine/threonine-protein kinase FLS2 [EC:2.7.11.1]+ko04016//MAPK signaling pathway - plant+ko04626//Plant-pathogen interaction	GO:0016020//membrane;GO:0031224//intrinsic component of membrane;GO:0044425//membrane part;GO:0016021//integral component of membrane;GO:0005488//binding;GO:0003824//catalytic activity;GO:0043167//ion binding;GO:0016740//transferase activity;GO:0005524//ATP binding;GO:0043168//anion binding;GO:0032553//ribonucleotide binding;GO:0030554//adenyl nucleotide binding;GO:1901265//nucleoside phosphate b…	XP_004233904.1|0.0e+00|PREDICTED: LRR receptor-like serine/threonine-protein kinase EFR [Solanum lycopersicum]
Solyc02g090940.3	1.08311	7.84013e-13	K12863//protein CWC15+ko03040//Spliceosome;K00145//N-acetyl-gamma-glutamyl-phosphate reductase [EC:1.2.1.38]+ko00220//Arginine biosynthesis+ko01230//Biosynthesis of amino acids+ko01100//Metabolic pathways+ko01110//Biosynthesis of secondary metabolites+ko01210//2-Oxocarboxylic acid metabolism;K16818//phospholipase A1 [EC:3.1.1.32]+ko00592//alpha-Linolenic acid metabolism+ko01100//Metabolic pathway…	GO:0044238//primary metabolic process;GO:0006629//lipid metabolic process;GO:0008152//metabolic process;GO:0071704//organic substance metabolic process;GO:0003824//catalytic activity;GO:0016787//hydrolase activity;	XP_004232025.1|1.7e-289|PREDICTED: uncharacterized protein LOC101267075 [Solanum lycopersicum]
Solyc09g010000.3	1.08233	5.13607e-156	K13229//2,4-dihydroxy-1,4-benzoxazin-3-one-glucoside dioxygenase [EC:1.14.11.59]+ko00402//Benzoxazinoid biosynthesis;K23145//scopoletin 8-hydroxylase [EC:1.14.11.60]	GO:0016491//oxidoreductase activity;GO:0043167//ion binding;GO:0046872//metal ion binding;GO:0003824//catalytic activity;GO:0043169//cation binding;GO:0005488//binding;	XP_004246496.1|4.5e-218|PREDICTED: 1-aminocyclopropane-1-carboxylate oxidase homolog 1-like [Solanum lycopersicum]
Solyc07g063740.2	1.08198	0.000139477	K04733//interleukin-1 receptor-associated kinase 4 [EC:2.7.11.1]	GO:0022414//reproductive process;GO:0051704//multi-organism process;GO:0009987//cellular process;GO:0007154//cell communication;GO:0009875//pollen-pistil interaction;GO:0009856//pollination;GO:0048544//recognition of pollen;GO:0044706//multi-multicellular organism process;GO:0032501//multicellular organismal process;GO:0008037//cell recognition;GO:0000003//reproduction;GO:0016020//membrane;GO:004…	XP_010324341.1|1.3e-153|PREDICTED: G-type lectin S-receptor-like serine/threonine-protein kinase At4g27290 [Solanum lycopersicum]
Solyc03g114600.3	1.08174	7.0215e-17	K04710//ceramide synthetase [EC:2.3.1.24]+ko00600//Sphingolipid metabolism+ko01100//Metabolic pathways	GO:0008152//metabolic process;GO:0006643//membrane lipid metabolic process;GO:0009987//cellular process;GO:1901566//organonitrogen compound biosynthetic process;GO:0071704//organic substance metabolic process;GO:0009058//biosynthetic process;GO:0006807//nitrogen compound metabolic process;GO:0046513//ceramide biosynthetic process;GO:0044237//cellular metabolic process;GO:0006665//sphingolipid met…	NP_001234320.1|4.0e-176|protein ASC1 [Solanum lycopersicum]
Solyc07g047800.3	1.08148	0	K13237//peroxisomal 2,4-dienoyl-CoA reductase [EC:1.3.1.34]+ko04146//Peroxisome	GO:0043231//intracellular membrane-bounded organelle;GO:0043227//membrane-bounded organelle;GO:0005623//cell;GO:0005737//cytoplasm;GO:0044444//cytoplasmic part;GO:0043229//intracellular organelle;GO:0005777//peroxisome;GO:0005622//intracellular;GO:0043226//organelle;GO:0044424//intracellular part;GO:0042579//microbody;GO:0044464//cell part;	XP_004243555.1|2.6e-148|PREDICTED: uncharacterized protein LOC101255117 [Solanum lycopersicum]
Solyc11g068700.1	1.07985	9.01594e-06			XP_015057795.1|2.0e-06|PREDICTED: F-box protein At2g27310 [Solanum pennellii]
Solyc02g036480.1	1.07932	1.46177e-10	K04077//chaperonin GroEL+ko03018//RNA degradation	GO:0016020//membrane;GO:0031224//intrinsic component of membrane;GO:0016021//integral component of membrane;GO:0044425//membrane part;	XP_010315726.1|5.3e-148|PREDICTED: NDR1/HIN1-Like protein 3 [Solanum lycopersicum]
Solyc11g011030.2	1.07926	0	K13464//jasmonate ZIM domain-containing protein+ko04075//Plant hormone signal transduction	GO:1903506//regulation of nucleic acid-templated transcription;GO:0045934//negative regulation of nucleobase-containing compound metabolic process;GO:0080090//regulation of primary metabolic process;GO:0010646//regulation of cell communication;GO:0031327//negative regulation of cellular biosynthetic process;GO:0019222//regulation of metabolic process;GO:0031324//negative regulation of cellular me…	NP_001234261.1|9.9e-128|Pto-responsive gene 1 protein [Solanum lycopersicum]
Solyc07g007270.3	1.07812	5.00453e-91			XP_004242715.1|6.4e-72|PREDICTED: uncharacterized protein LOC101253390 [Solanum lycopersicum]
Solyc06g071725.1	1.07756	0.0001775	K04733//interleukin-1 receptor-associated kinase 4 [EC:2.7.11.1];K03553//recombination protein RecA+ko03440//Homologous recombination	GO:0050896//response to stimulus;GO:0006950//response to stress;	XP_015078838.1|1.5e-107|PREDICTED: U-box domain-containing protein 35-like [Solanum pennellii]
Solyc07g054760.1	1.07622	4.92708e-17			XP_004243310.1|8.3e-42|PREDICTED: uncharacterized protein LOC101254813 [Solanum lycopersicum]
Solyc04g011860.1	1.07617	3.22811e-16	K03676//glutaredoxin 3	GO:0045454//cell redox homeostasis;GO:0050794//regulation of cellular process;GO:0019725//cellular homeostasis;GO:0065008//regulation of biological quality;GO:0042592//homeostatic process;GO:0050789//regulation of biological process;GO:0009987//cellular process;GO:0065007//biological regulation;GO:0005623//cell;GO:0015036//disulfide oxidoreductase activity;GO:0003824//catalytic activity;GO:001503…	XP_004236715.1|5.4e-51|PREDICTED: monothiol glutaredoxin-S1-like [Solanum lycopersicum]
Solyc03g026000.3	1.07513	7.11641e-30	K08360//cytochrome b-561 [EC:7.2.1.3]		XP_004234373.1|7.5e-69|PREDICTED: uncharacterized protein LOC101244747 [Solanum lycopersicum]
Solyc06g009270.3	1.0736	4.90298e-155	K00901//diacylglycerol kinase (ATP) [EC:2.7.1.107]+ko01100//Metabolic pathways+ko01110//Biosynthesis of secondary metabolites+ko04070//Phosphatidylinositol signaling system+ko00564//Glycerophospholipid metabolism+ko00561//Glycerolipid metabolism	GO:0007165//signal transduction;GO:0051716//cellular response to stimulus;GO:0065007//biological regulation;GO:0007154//cell communication;GO:0009987//cellular process;GO:0050789//regulation of biological process;GO:0023052//signaling;GO:0007205//protein kinase C-activating G protein-coupled receptor signaling pathway;GO:0050794//regulation of cellular process;GO:0050896//response to stimulus;GO:…	XP_004240557.1|1.7e-283|PREDICTED: diacylglycerol kinase 7 [Solanum lycopersicum]
Solyc01g111075.1	1.0723	5.8868e-129	K20887//xyloglucan glycosyltransferase 4 [EC:2.4.1.-];K03860//phosphatidylinositol glycan, class Q+ko01100//Metabolic pathways+ko00563//Glycosylphosphatidylinositol (GPI)-anchor biosynthesis	GO:0006952//defense response;GO:0050896//response to stimulus;GO:0006950//response to stress;GO:0005623//cell;GO:0005576//extracellular region;GO:0030312//external encapsulating structure;GO:0005618//cell wall;GO:0044464//cell part;GO:0071944//cell periphery;	NP_001307142.1|8.5e-56|snakin-2 precursor [Solanum lycopersicum]
Solyc07g041750.3	1.068	3.49601e-213	K02941//large subunit ribosomal protein LP0+ko03010//Ribosome;K22733//magnesium transporter	GO:0016021//integral component of membrane;GO:0016020//membrane;GO:0043229//intracellular organelle;GO:0005794//Golgi apparatus;GO:0009507//chloroplast;GO:0031224//intrinsic component of membrane;GO:0043231//intracellular membrane-bounded organelle;GO:0043226//organelle;GO:0044444//cytoplasmic part;GO:0044464//cell part;GO:0005622//intracellular;GO:0009536//plastid;GO:0005623//cell;GO:0005737//cy…	XP_004243713.1|0.0e+00|PREDICTED: uncharacterized protein At1g04910 [Solanum lycopersicum]
Solyc02g014030.2	1.06773	7.76836e-25	K04733//interleukin-1 receptor-associated kinase 4 [EC:2.7.11.1]	GO:0008144//drug binding;GO:0035639//purine ribonucleoside triphosphate binding;GO:0097367//carbohydrate derivative binding;GO:0030554//adenyl nucleotide binding;GO:0043167//ion binding;GO:0005488//binding;GO:0016740//transferase activity;GO:0016772//transferase activity, transferring phosphorus-containing groups;GO:1901363//heterocyclic compound binding;GO:0000166//nucleotide binding;GO:0032559/…	XP_019067666.1|0.0e+00|PREDICTED: receptor-like protein kinase FERONIA [Solanum lycopersicum]
Solyc01g103470.2	1.06763	1.43648e-13			OIT34048.1|7.1e-63|hypothetical protein A4A49_16324 [Nicotiana attenuata]
Solyc02g082950.3	1.06721	0.000433321	K22912//5-amino-6-(5-phospho-D-ribitylamino)uracil phosphatase [EC:3.1.3.104]+ko00740//Riboflavin metabolism+ko01100//Metabolic pathways+ko01110//Biosynthesis of secondary metabolites	GO:0071554//cell wall organization or biogenesis;GO:0009987//cellular process;GO:0016021//integral component of membrane;GO:0044464//cell part;GO:0043229//intracellular organelle;GO:0044444//cytoplasmic part;GO:0043231//intracellular membrane-bounded organelle;GO:0044424//intracellular part;GO:0044425//membrane part;GO:0005737//cytoplasm;GO:0016020//membrane;GO:0005623//cell;GO:0031224//intrinsic…	XP_004232548.1|3.5e-249|PREDICTED: protein trichome birefringence-like 34 [Solanum lycopersicum]
Solyc06g082570.2	1.06599	8.57587e-87	K10352//myosin heavy chain;K20478//golgin subfamily B member 1	GO:0005515//protein binding;GO:0003779//actin binding;GO:0008092//cytoskeletal protein binding;GO:0005488//binding;	XP_004242479.1|3.1e-180|PREDICTED: protein NETWORKED 4B-like [Solanum lycopersicum]
Solyc10g078360.2	1.06425	2.20395e-09	K00059//3-oxoacyl-[acyl-carrier protein] reductase [EC:1.1.1.100]+ko01100//Metabolic pathways+ko00061//Fatty acid biosynthesis+ko01212//Fatty acid metabolism+ko00780//Biotin metabolism	GO:0003824//catalytic activity;GO:0016491//oxidoreductase activity;	XP_004249129.1|3.4e-143|PREDICTED: uncharacterized protein LOC101265973 [Solanum lycopersicum]
Solyc07g045190.2	1.06371	2.26732e-162	K16285//RING/U-box domain-containing protein [EC:2.3.2.27]	GO:0016021//integral component of membrane;GO:0031224//intrinsic component of membrane;GO:0044425//membrane part;GO:0016020//membrane;GO:0003824//catalytic activity;GO:0016874//ligase activity;	XP_004243593.1|1.9e-100|PREDICTED: probable E3 ubiquitin-protein ligase XERICO isoform X1 [Solanum lycopersicum]
Solyc04g050620.3	1.06368	3.68223e-194	K20562//biphenyl-4-hydroxylase	GO:0009058//biosynthetic process;GO:0019748//secondary metabolic process;GO:0044550//secondary metabolite biosynthetic process;GO:0008152//metabolic process;GO:0016020//membrane;GO:1901363//heterocyclic compound binding;GO:0046906//tetrapyrrole binding;GO:0005506//iron ion binding;GO:0005488//binding;GO:0043169//cation binding;GO:0046872//metal ion binding;GO:0097159//organic cyclic compound bind…	XP_004237505.1|3.1e-290|PREDICTED: cytochrome P450 CYP736A12-like [Solanum lycopersicum]
Solyc12g009240.1	1.06313	0.000376859	K09286//EREBP-like factor	GO:0008152//metabolic process;GO:0090304//nucleic acid metabolic process;GO:0046483//heterocycle metabolic process;GO:0016070//RNA metabolic process;GO:1901576//organic substance biosynthetic process;GO:0071704//organic substance metabolic process;GO:0010467//gene expression;GO:0044260//cellular macromolecule metabolic process;GO:0044249//cellular biosynthetic process;GO:0043170//macromolecule me…	XP_004251702.1|4.0e-140|PREDICTED: ethylene-responsive transcription factor ERF017 [Solanum lycopersicum]
Solyc03g031440.3	1.06265	4.13447e-10	K03809//NAD(P)H dehydrogenase (quinone) [EC:1.6.5.2]+ko00130//Ubiquinone and other terpenoid-quinone biosynthesis+ko01100//Metabolic pathways+ko01110//Biosynthesis of secondary metabolites	GO:0000166//nucleotide binding;GO:1901265//nucleoside phosphate binding;GO:1901363//heterocyclic compound binding;GO:0036094//small molecule binding;GO:0097367//carbohydrate derivative binding;GO:0005488//binding;GO:0016655//oxidoreductase activity, acting on NAD(P)H, quinone or similar compound as acceptor;GO:0048037//cofactor binding;GO:0043167//ion binding;GO:0003824//catalytic activity;GO:000…	XP_019234773.1|3.1e-74|PREDICTED: probable NAD(P)H dehydrogenase (quinone) FQR1-like 1 [Nicotiana attenuata]
Solyc01g110910.3	1.06254	3.97146e-10	K14488//SAUR family protein+ko04075//Plant hormone signal transduction	GO:0009719//response to endogenous stimulus;GO:0050896//response to stimulus;GO:0009733//response to auxin;GO:0042221//response to chemical;GO:0010033//response to organic substance;GO:0009725//response to hormone;	XP_015169989.1|3.7e-38|PREDICTED: auxin-responsive protein SAUR21-like [Solanum tuberosum]
Solyc02g086210.3	1.06184	5.84675e-52	K04733//interleukin-1 receptor-associated kinase 4 [EC:2.7.11.1]	GO:0031224//intrinsic component of membrane;GO:0044425//membrane part;GO:0016020//membrane;GO:0016021//integral component of membrane;GO:0043167//ion binding;GO:0016301//kinase activity;GO:1901265//nucleoside phosphate binding;GO:0004672//protein kinase activity;GO:0001871//pattern binding;GO:0016740//transferase activity;GO:0036094//small molecule binding;GO:0003824//catalytic activity;GO:004316…	XP_004232341.1|0.0e+00|PREDICTED: LEAF RUST 10 DISEASE-RESISTANCE LOCUS RECEPTOR-LIKE PROTEIN KINASE-like 2.1 [Solanum lycopersicum]
Solyc07g032480.3	1.06061	1.21822e-86	K15188//cyclin T	GO:0050789//regulation of biological process;GO:0010604//positive regulation of macromolecule metabolic process;GO:0010562//positive regulation of phosphorus metabolic process;GO:0031328//positive regulation of cellular biosynthetic process;GO:0010557//positive regulation of macromolecule biosynthetic process;GO:0031325//positive regulation of cellular metabolic process;GO:0032268//regulation of …	XP_015080406.1|2.3e-241|PREDICTED: cyclin-T1-3-like [Solanum pennellii]
Solyc10g007890.3	1.05957	0.000618098	K07428//cytochrome P450 family 4 subfamily X [EC:1.14.14.1];K07426//cytochrome P450 family 4 subfamily B polypeptide 1 [EC:1.14.14.1];K07425//long-chain fatty acid omega-monooxygenase [EC:1.14.14.80]+ko00590//Arachidonic acid metabolism+ko01100//Metabolic pathways+ko00071//Fatty acid degradation	GO:0044425//membrane part;GO:0016021//integral component of membrane;GO:0031224//intrinsic component of membrane;GO:0016020//membrane;GO:0046914//transition metal ion binding;GO:0048037//cofactor binding;GO:0020037//heme binding;GO:0043167//ion binding;GO:0046906//tetrapyrrole binding;GO:0016491//oxidoreductase activity;GO:0043169//cation binding;GO:0004497//monooxygenase activity;GO:0005506//iro…	XP_004248200.1|8.3e-312|PREDICTED: cytochrome P450 CYP72A219-like [Solanum lycopersicum]
Solyc02g083120.2	1.05713	1.26628e-32	K04421//mitogen-activated protein kinase kinase kinase 3 [EC:2.7.11.25]		XP_004232543.1|9.8e-162|PREDICTED: uncharacterized protein LOC101250469 [Solanum lycopersicum]
Solyc08g078510.3	1.05705	5.28411e-148	K04733//interleukin-1 receptor-associated kinase 4 [EC:2.7.11.1]		XP_004245778.1|8.3e-165|PREDICTED: GEM-like protein 5 [Solanum lycopersicum]
Solyc02g062375.1	1.0569	3.90192e-157	K01062//platelet-activating factor acetylhydrolase [EC:3.1.1.47]+ko01100//Metabolic pathways+ko01110//Biosynthesis of secondary metabolites+ko00565//Ether lipid metabolism		XP_010317232.1|0.0e+00|PREDICTED: zinc finger CCCH domain-containing protein 44 isoform X1 [Solanum lycopersicum]
Solyc04g082200.2	1.0565	0	K18626//trichohyalin	GO:0009266//response to temperature stimulus;GO:0010035//response to inorganic substance;GO:1901700//response to oxygen-containing compound;GO:0050896//response to stimulus;GO:0001101//response to acid chemical;GO:0010033//response to organic substance;GO:0009719//response to endogenous stimulus;GO:0009409//response to cold;GO:0009631//cold acclimation;GO:0097305//response to alcohol;GO:0009414//…	NP_001316365.1|1.4e-112|dehydrin [Solanum lycopersicum]
Solyc12g010800.2	1.05647	2.58034e-61	K04374//cyclic AMP-dependent transcription factor ATF-4+ko04141//Protein processing in endoplasmic reticulum;K20557//transcription factor VIP1+ko04016//MAPK signaling pathway - plant	GO:0097159//organic cyclic compound binding;GO:0003677//DNA binding;GO:0140110//transcription regulator activity;GO:0005488//binding;GO:1901363//heterocyclic compound binding;GO:0003676//nucleic acid binding;GO:0003700//DNA-binding transcription factor activity;	XP_004251798.1|9.9e-173|PREDICTED: basic leucine zipper 34-like [Solanum lycopersicum]
Solyc04g079940.3	1.0563	3.82056e-111		GO:0008152//metabolic process;GO:0050789//regulation of biological process;GO:0019222//regulation of metabolic process;GO:0009058//biosynthetic process;GO:0044237//cellular metabolic process;GO:0009059//macromolecule biosynthetic process;GO:0034645//cellular macromolecule biosynthetic process;GO:0032774//RNA biosynthetic process;GO:0044238//primary metabolic process;GO:0043170//macromolecule meta…	XP_015071782.1|4.2e-227|PREDICTED: uncharacterized protein LOC107015875 isoform X1 [Solanum pennellii]
Solyc05g041910.3	1.05471	9.61587e-216		GO:0008152//metabolic process;GO:0055114//oxidation-reduction process;GO:0016021//integral component of membrane;GO:0016020//membrane;GO:0031224//intrinsic component of membrane;GO:0044425//membrane part;	XP_004240164.1|1.5e-235|PREDICTED: cytochrome b561 and DOMON domain-containing protein At5g47530 [Solanum lycopersicum]
Solyc01g104432.1	1.05385	4.24895e-32	K14297//nuclear pore complex protein Nup98-Nup96+ko03013//RNA transport		XP_015165055.1|3.0e-46|PREDICTED: nuclear pore complex protein NUP98B-like isoform X1 [Solanum tuberosum]
Solyc10g012080.3	1.05198	7.56268e-34	K02184//formin 2	GO:0016874//ligase activity;GO:0003824//catalytic activity;	XP_015089639.1|4.0e-101|PREDICTED: uncharacterized protein LOC107032545 [Solanum pennellii]
Solyc12g013960.2	1.05059	1.23048e-30			XP_004251869.1|0.0e+00|PREDICTED: uncharacterized protein LOC101253258 [Solanum lycopersicum]
Solyc12g096610.2	1.04911	7.91512e-21	K07759//poly(ADP-ribose) glycohydrolase [EC:3.2.1.143]	GO:0044238//primary metabolic process;GO:0071704//organic substance metabolic process;GO:0005975//carbohydrate metabolic process;GO:0008152//metabolic process;GO:0004649//poly(ADP-ribose) glycohydrolase activity;GO:0003824//catalytic activity;GO:0016798//hydrolase activity, acting on glycosyl bonds;GO:0004553//hydrolase activity, hydrolyzing O-glycosyl compounds;GO:0016787//hydrolase activity;	XP_004253043.1|2.8e-142|PREDICTED: poly(ADP-ribose) glycohydrolase 1-like isoform X1 [Solanum lycopersicum]
Solyc11g011670.1	1.04906	2.0801e-16	K14488//SAUR family protein+ko04075//Plant hormone signal transduction	GO:0065007//biological regulation;GO:0010817//regulation of hormone levels;GO:0010033//response to organic substance;GO:0065008//regulation of biological quality;GO:0051179//localization;GO:0009733//response to auxin;GO:0009914//hormone transport;GO:0006810//transport;GO:0050789//regulation of biological process;GO:0009926//auxin polar transport;GO:0051239//regulation of multicellular organismal …	XP_004250219.1|2.0e-75|PREDICTED: auxin-responsive protein SAUR68-like [Solanum lycopersicum]
Solyc11g012840.2	1.04699	3.58608e-13	K10523//speckle-type POZ protein	GO:0006511//ubiquitin-dependent protein catabolic process;GO:0051603//proteolysis involved in cellular protein catabolic process;GO:0044248//cellular catabolic process;GO:0065007//biological regulation;GO:0010498//proteasomal protein catabolic process;GO:0044265//cellular macromolecule catabolic process;GO:0009057//macromolecule catabolic process;GO:0043412//macromolecule modification;GO:0016567/…	NP_001305157.1|5.6e-190|BTB/POZ domain-containing protein [Solanum lycopersicum]
Solyc01g087490.3	1.04608	1.47588e-160	K09571//FK506-binding protein 4/5 [EC:5.2.1.8];K09574//FK506-binding protein 8 [EC:5.2.1.8]	GO:0048856//anatomical structure development;GO:0001708//cell fate specification;GO:0009790//embryo development;GO:0009653//anatomical structure morphogenesis;GO:0007275//multicellular organism development;GO:0007389//pattern specification process;GO:0045165//cell fate commitment;GO:0030154//cell differentiation;GO:0048507//meristem development;GO:0048869//cellular developmental process;GO:003250…	XP_004229643.1|0.0e+00|PREDICTED: protein OBERON 4 [Solanum lycopersicum]
Solyc07g008560.3	1.04574	3.2586e-70	K22390//acid phosphatase type 7	GO:0016788//hydrolase activity, acting on ester bonds;GO:0042578//phosphoric ester hydrolase activity;GO:0043167//ion binding;GO:0043169//cation binding;GO:0005488//binding;GO:0003993//acid phosphatase activity;GO:0003824//catalytic activity;GO:0046872//metal ion binding;GO:0016787//hydrolase activity;GO:0016791//phosphatase activity;	XP_015082561.1|0.0e+00|PREDICTED: probable inactive purple acid phosphatase 27 [Solanum pennellii]
Solyc07g008280.3	1.04516	7.02044e-13		GO:0044425//membrane part;GO:0016021//integral component of membrane;GO:0016020//membrane;GO:0031224//intrinsic component of membrane;	XP_004242784.1|2.6e-74|PREDICTED: uncharacterized protein LOC101249561 [Solanum lycopersicum]
Solyc12g098757.1	1.04445	1.5977e-10	K10955//mucin-2	GO:0071840//cellular component organization or biogenesis;GO:0071669//plant-type cell wall organization or biogenesis;GO:0045229//external encapsulating structure organization;GO:0016043//cellular component organization;GO:0071554//cell wall organization or biogenesis;GO:0009664//plant-type cell wall organization;GO:0071555//cell wall organization;GO:0009987//cellular process;GO:0005199//structur…	XP_015061537.1|0.0e+00|PREDICTED: extensin-2-like [Solanum pennellii]
Solyc08g062220.3	1.0425	2.64779e-111	K13691//pathogen-inducible salicylic acid glucosyltransferase [EC:2.4.1.-]	GO:0008152//metabolic process;GO:0016740//transferase activity;GO:0016758//transferase activity, transferring hexosyl groups;GO:0003824//catalytic activity;GO:0016757//transferase activity, transferring glycosyl groups;	XP_015085132.1|3.4e-265|PREDICTED: UDP-glycosyltransferase 74F2-like [Solanum pennellii]
[truncated: 7,142 more rows]

## Sheet: NP_Fe-_leaf
Gene ID	log2(NP_Fe-_leaf/control_leaf)	Qvalue(control_leaf-vs-NP_Fe-_leaf)	Kegg Orthology	GO	Nr
[truncated: 7,595 more rows]

## Sheet: Fe-_leaf
Gene ID	log2(Fe-_leaf/control_leaf)	Qvalue(control_leaf-vs-Fe-_leaf)	Kegg Orthology	GO	Nr
[truncated: 9,093 more rows]

[truncated: 3 more sheets: NP_root, NP_Fe-_root, Fe-_root]
